# Supplementary material for: Heterologous biosynthesis of prenylated resveratrol through multiplex metabolic engineering in Escherichia coli
Source: Royal Society of Chemistry journal article supplement (doi:10.1039/d4gc00053f), 2024-01-01
Supplement: d4gc00053f1.pdf [file d4gc00053f1.pdf]

## Supplementary materials

Heterologous biosynthesis of prenylated resveratrol through multiplex metabolic  
engineering in *Escherichia coli*

Haijiao Wang<sup>a,b,c,#</sup>, Ting Zhou<sup>a,b,c,#</sup>, Hui Liu<sup>a,b,c</sup>, Lingrong Wen<sup>a,b,c</sup>, Yueming Jiang<sup>a,b,c</sup>,

Bao Yang<sup>a,b,c,\*</sup>

<sup>a</sup> Guangdong Provincial Key Laboratory of Applied Botany, Key State Laboratory of  
Plant Diversity and Specialty Crops, Key Laboratory of National Forestry and  
Grassland Administration on Plant Conservation and Utilization in Southern China,  
South China Botanical Garden, Chinese Academy of Sciences, Guangzhou 510650,  
China

<sup>b</sup> South China National Botanical Garden, Guangzhou 510650, China

<sup>c</sup> University of Chinese Academy of Sciences, Beijing 100049, China

Table S1 Primers used in this study.

| Name         | Seuqence                                                  | Description                                                                                             |
|--------------|-----------------------------------------------------------|---------------------------------------------------------------------------------------------------------|
| pJ-F1        | ATGAGCGAATTACGTGCATTGAGC                                  | Primers used to amplify the fragments for pJBEI6410-1                                                   |
| pJ-R1        | GTATATCTCCTTCTTAAAAGATCCTTAA<br>TTCTGACGAAATG             |                                                                                                         |
| pJ-F2        | GACAGTAATTAAGCCGCCATTGAACG                                |                                                                                                         |
| pJ-R2        | ACGTAATTCGCTCATATGATCTCCCT                                |                                                                                                         |
| pJ-F3        | GCTTTAATTACTGTGCCCCCAGG                                   |                                                                                                         |
| pJ-R3        | AAGAAGGAGATATACGGATCCAAACT<br>CGAGTAAGGATCTCC             |                                                                                                         |
| pJ-F4        | CACAACGGCACGATCAACACG                                     | Primers used to amplify the fragments for pJBEI6410-2 and pJBEI6410-3                                   |
| pJ-R4        | CTCGAGTTTGGATCCGTATATCTCCTTC<br>TAAAAGATCCTGAAATTGT       |                                                                                                         |
| pJ-F5        | GTCCCGGTAAATGTTGTCACCTCG                                  |                                                                                                         |
| pJ-R5        | GATCGTGCCGTTGTGGCTGTCTTTC                                 |                                                                                                         |
| pJ-F6        | GGATCCAAACTCGAGTAAGGATCTCC                                |                                                                                                         |
| pJ-R6        | AACATTTACGGGACGATTTCCG                                    |                                                                                                         |
| pJ-R7        | GTATATCTCCTTCTTAAAAGATCCTGA<br>AATTGT                     |                                                                                                         |
| IacE-F2      | AAGAAGGAGATATACATGGCTATCTCA<br>ACCCCTTCCAAC               | Primers used to insert At4CL and VvSTS into pCDFDuet-1 for pCDFRESa.                                    |
| IacE-R2      | CTCGAGTTTGGATCCTTAGTAGTAGAA<br>CTCG                       |                                                                                                         |
| 4CL-BamHI-F  | ACCATCATCACCACAGCCAGGATCCGA<br>TGCGCCGCAGGAACAG           |                                                                                                         |
| 4CL-NotI-R   | GTTGACTTAAGCATTATGCGGCCGCC<br>AGACCGTTCGCCAGTTTCG         | Primers used for the fusion of At4CL-VvSTS, used with 4CL-BamHI-F and STS-XhoI-R to construct pCDFRESf. |
| STS-NdeI-F   | GTATAAGAAGGAGATATACATATGGCG<br>TCTGTTGAAGAA               |                                                                                                         |
| STS-XhoI-R   | GCAGCGGTTTCTTTACCAGATTAGTTG<br>GTAACGGTCGGA               |                                                                                                         |
| 4CL-fusion-R | TTTCGCCGCCGCTTCCAGACCGTTCGCC<br>AGTTTCG                   | Primers for anti-sense RNA expressing plasmids                                                          |
| STS-fusion-F | GAAGCGGCGGCGAAAATGGCGTCTGTT<br>GAAGAA                     |                                                                                                         |
| Plac-pET28-F | TGCGTCCGGCGTAGAGGATCGTCTAGA<br>GACTGGAAAGCGGGCAGTG        | Primers for anti-sense RNA expressing plasmids                                                          |
| Plac-R       | CCTCCATGGTGAAATTGTTATCCGCTC<br>ACAATTCC                   |                                                                                                         |
| asgltA-lac-F | CGGATAACAATTTACCATGGAGGAGG<br>AATTAACCATGCAGTGGTGGTGGTGGT |                                                                                                         |

|               |                                                                                        |                                                                                                      |
|---------------|----------------------------------------------------------------------------------------|------------------------------------------------------------------------------------------------------|
|               | GGTGCACATCCAGTTCAACAGCTG                                                               |                                                                                                      |
| asgltA-R      | GCTGTCCACCAGTCATAGGAGGAATTA<br>ACCATGCAGTGGTGGTGGTGGTGGTGG<br>GTTTTCCCCTCTTTCACAG      |                                                                                                      |
| lac-asacpS-F  | GATAACAATTTACCATGGAGGAGGAA<br>TTAACCATGCAGTGGTGGTGGTGGTGG<br>TGCATTTCGTTATCGCTTAATACGC |                                                                                                      |
| asacpS-R      | GCTGTCCACCAGTCATAGGAGGAATTA<br>ACCATGCAGTGGTGGTGGTGGTGGTGG<br>CATCCCTGAGATGCATG        |                                                                                                      |
| lac-asacpT-F  | GGATAACAATTTACCATGGAGGAGGA<br>ATTAACCATGCAGTGGTGGTGGTGGTGG<br>GTGATAGATGATCTCCGGTAGCG  |                                                                                                      |
| ascapT-R      | GCTGTCCACCAGTCATAGGAGGAATTA<br>ACCATGCAGTGGTGGTGGTGGTGGTGG<br>AAGGCGGTAGCAAAGT         |                                                                                                      |
| Target-accA-F | GTAAGTGGAGTTTACTAATACGTTTT<br>AGAGCTAGAAATAGCAAGTT                                     |                                                                                                      |
| Target-accA-R | GTATTAGTCAAACCTCCAGTTACTAGTA<br>TTATACCTAGGACTGAGC                                     |                                                                                                      |
| Target-accB-F | ATCACACTAAACAAAGAGTAGTTTTAG<br>AGCTAGAAATAGCAAGTT                                      | Primers used for sgRNA<br>expressing plasmids<br>pTargetF-accA, pTargetF-<br>accB, and pTargetF-ACS. |
| Target-accB-R | TACTCTTTGTTTAGTGTGATACTAGTAT<br>TATACCTAGGACTGAGC                                      |                                                                                                      |
| Target-acs-F  | CATATTATTAACATCCTACAGTTTTAGA<br>GCTAGAAATAGCAAGTT                                      |                                                                                                      |
| Target-acs-R  | CTGTAGGATGTTAATAATATGACTAGT<br>ATTATACCTAGGACTGAGC                                     |                                                                                                      |
| 119-C-F       | TTGACAGCTAGCTCAGTCCTAGGTATA<br>ATGCTAGCTAATAGAAATAATTTTGTT<br>TAACT                    | For amplification of J23119<br>promoter with an artificial<br>RBS and a 6His tag.                    |
| 119-C-R       | TGATGCATTCTTGCCTCTTAACTTTAAA<br>GTTAAACAAAATTATTCTATTAGCTA<br>GCAT                     |                                                                                                      |
| accA-119-Dn-F | TAAGAGGCAAGAATGCATCATCACCAT<br>CACCACATGAGTCTGAATTTCTTGATT<br>TTGA                     | For amplification of <i>accA</i><br>homologous arms                                                  |
| accA-119-Dn-R | GACGATAGCTTTATCGTCTGC                                                                  |                                                                                                      |
| accA-119-UP-F | GCTTGCTATCTCGCTGAC                                                                     |                                                                                                      |
| accA-119-UP-R | GGACTGAGCTAGCTGTCAACACCGCCA<br>GAGATAATTAGTC                                           |                                                                                                      |
| 119-accB-Dn-F | TAAGAGGCAAGAATGCATCATCACCAT<br>CACCACATGAGTCTGAATTTCTTGATT<br>TTGA                     | For amplification of <i>accB</i><br>homologous arms                                                  |

|               |                                                                 |                                                    |
|---------------|-----------------------------------------------------------------|----------------------------------------------------|
| 119-accB-Dn-R | GACGATAGCTTTATCGTCTGC                                           |                                                    |
| 119-accB-UP-F | GCTTGCTATCTCGCTGAC                                              |                                                    |
| 119-accB-UP-R | GGACTGAGCTAGCTGTCAACACCGCCA<br>GAGATAATTAGTC                    |                                                    |
| 119-acs-Dn-F  | TAAGAGGCAAGAATGCATCATCACCAT<br>CACCACATGAGCCAAATTCACAAACAC<br>A | For amplification of <i>ACS</i><br>homologous arms |
| 119-acs-Dn-R  | GCTGATATGTTTGCTCTGGC                                            |                                                    |
| 119-acs-UP-F  | CACGACAGTAACCGCACC                                              |                                                    |
| 119-acs-UP-R  | GGACTGAGCTAGCTGTCAATGGCATAA<br>GCGTTAAATGTAGG                   |                                                    |

Table S2 DNA sequences

| Name                   | Seuquence                                                                                                                                                                                                                                                                                                                                                                                                                                                                                                         | Description                                                                                                                                                         |
|------------------------|-------------------------------------------------------------------------------------------------------------------------------------------------------------------------------------------------------------------------------------------------------------------------------------------------------------------------------------------------------------------------------------------------------------------------------------------------------------------------------------------------------------------|---------------------------------------------------------------------------------------------------------------------------------------------------------------------|
| <i>lac</i> promoter    | <u>TCTAG</u> Agactggaaagcgggcagtgagcgcaacgcaattaat<br>gtgagttagctcactcattagccacccaggctttacactttatgcttcc<br>ggctcgtatgttgtgtggaattgtgagcggataacaattca <b>CCAT</b><br><b>GG</b>                                                                                                                                                                                                                                                                                                                                     | Amplified from pUC19 with XbaI/NcoI added to either ends.                                                                                                           |
| asgltA                 | <u>aggaggaattaac</u> catgcagtggtggtggtggtg <b>CACATC</b><br><b>CAGTTCAACAGCTGTGTCCCCGTTGAG</b><br><b>GGTGAGTTTGTCTTTGTATCAGCCATT</b><br><b>TAAGGTCTCCTTAGCGCCTTATTGCGTA</b><br><b>AGACTGCCGGA</b> ACTTAAATTTGCCTTCG<br><b>CACATCAACCTGGCTTTACCCGTTTGT</b><br><b>ATTTGGCTCGCCGCTCTGTGAAAGAGG</b><br><b>GGAAAACC</b> <u>caccaccaccaccactgcatggttaattcct</u><br><u>cct</u>                                                                                                                                           | Anti-sense RNA for <i>gltA</i> . Underlined letters are post trascription reverse complementary structures, bolded letters are target mRNA complementary sequences. |
| asacpS                 | <u>aggaggaattaac</u> catgcagtggtggtggtggtg <b>CATT</b> CG<br><b>TTATCGCTTAATACGCGGCGTGCCAGG</b><br><b>CGATCACCGGATCGGGCGATCACCGCT</b><br><b>TCGATGCGAGCGATCTCCACAATATCC</b><br><b>GTGCCTAAACCTAATATTGCCATTAGCC</b><br><b>ACGCGCTTCCAGCATCAGACGCTTCATT</b><br><b>TCTGCCACCGCATCTTTCAGTCCGGTCA</b><br><b>TCACTGCACGACCAATAATGGCATGAC</b><br><b>CGATATTCAGTTCATGCATCTCAGGGAT</b><br><b>GG</b> <u>caccaccaccaccactgcatggttaattcctcct</u>                                                                              | Anti-sense RNA for <i>acpS</i> . Underlined letters are post trascription reverse complementary structures, bolded letters are target mRNA complementary sequences. |
| asacpT                 | <u>aggaggaattaac</u> catgcagtggtggtggtggtg <b>ATAGAT</b><br><b>GATCTCCGGTAGCGGGAAAGCGTGTG</b><br><b>CGAAAGCAATGCACGCCCCGCCAGCCA</b><br><b>GCGTTCGCGTCGTGGACCTTGCGGTGC</b><br><b>TTGCTCGCGTAAACCCGGTGGCAGTGG</b><br><b>AGCTGCGCTTAAGGTGCAA</b> ACTTTCCCC<br><b>AGA</b> ACTATCCGATACATATCAGGGCCA<br><b>ACGTTTAATGGAAAATGAAAGTGC</b> GTAT<br><b>CGTATCACTTGTGCGCTCATCCCGGTAA</b><br><b>CCGACTTTTCGGTCTGCCCGGCCCCAG</b><br><b>TAAAATCGCCAGTTTGCTACCGCCTTT</b> <u>ca</u><br><u>ccaccaccaccaccactgcatggttaattcctcct</u> | Anti-sense RNA for <i>acpS</i> . Underlined letters are post trascription reverse complementary structures, bolded letters are target mRNA complementary sequences. |
| J23119 promoter region | <u>ttgacagctagctcagtcctaggtataatgctagc</u> <i>TAATAGAAA</i><br><i>TAATTTTGTTAACTTTAAAGTTAAGAGGCAA</i><br><b>GAATGCATCATCACCATCACCAC</b>                                                                                                                                                                                                                                                                                                                                                                           | Underlined letters are J23119 promoter sequence, italic letters are artificial RBS sequence, bolded letters are His tag sequence.                                   |
| sgRNA for <i>accA</i>  | AACTGGAGTTTGACTAATAC                                                                                                                                                                                                                                                                                                                                                                                                                                                                                              |                                                                                                                                                                     |

|                                                     |                                                                                                                                                                                                                                                                                                                                                                                                                                                                                                                                                                                                                                                                                                                                                                                                                                                                                                                                                                             |                                                                                                                                                                            |
|-----------------------------------------------------|-----------------------------------------------------------------------------------------------------------------------------------------------------------------------------------------------------------------------------------------------------------------------------------------------------------------------------------------------------------------------------------------------------------------------------------------------------------------------------------------------------------------------------------------------------------------------------------------------------------------------------------------------------------------------------------------------------------------------------------------------------------------------------------------------------------------------------------------------------------------------------------------------------------------------------------------------------------------------------|----------------------------------------------------------------------------------------------------------------------------------------------------------------------------|
| sgRNA for <i>accB</i>                               | ATCACACTAAACAAAGAGTA                                                                                                                                                                                                                                                                                                                                                                                                                                                                                                                                                                                                                                                                                                                                                                                                                                                                                                                                                        |                                                                                                                                                                            |
| sgRNA for <i>acs</i>                                | CATATTATTAACATCCTACA                                                                                                                                                                                                                                                                                                                                                                                                                                                                                                                                                                                                                                                                                                                                                                                                                                                                                                                                                        |                                                                                                                                                                            |
| DNA fragment used for <i>accA</i> promoter editing  | <p><u>GCTTGCTATCTCGCTGACGGACAGGCAAA</u><br/> <u>TTGATGACCAGCTTTTAAACCGACTCCGTC</u><br/> <u>AGTCTCTGGAACCCACCGCTCTGGGACA</u><br/> <u>ATCCAGTACATCTCTACTATCAGAGGGC</u><br/> <u>GGATGCACGCGCGCGGTTGCGTTTTGGCG</u><br/> <u>CGACGTGGCGTGTCTCTCCGAGCGATCGT</u><br/> <u>TTATTAACGATCTCCGTGGCCTCATTGGT</u><br/> <u>TCGGAGCAGGTGGAAGTGGAGTTTGACTA</u><br/> <u>ATTATCTCTTTGACAGCTAGCTCAGTCCTAG</u><br/> <i>GTATAATGCTAGCTAATAGAAATAATTTTGTTT</i><br/> <i>AACTTTAAAGTTAAGAGGCAAGAATGCATCAT</i><br/> <u>CACCATCACCATGAGTCTGAATTTCC</u><br/> <u>TGATTTTGAACAGCCGATTGCAGAGCT</u><br/> <u>GGAAGCGAAAATCGATTCTCTGACTGC</u><br/> <u>GGTTAGCCGTCAGGATGAGAACTGGA</u><br/> <u>TATTAACATCGATGAAGAAGTGCATCGT</u><br/> <u>CTGCGTGAAAAAAGCGTAGAACTGACA</u><br/> <u>CGTAAAATCTTCGCCGATCTCGGTGCAT</u><br/> <u>GGCAGATTGCGCAACTGGCACGCCATC</u><br/> <u>CACAGCGTCCTTATACCCTGGATTACGT</u><br/> <u>TCGCCTGGCATTGATGAATTTGACGAA</u><br/> <u>CTGGCTGGCGACCGCGGTATGCAGAC</u><br/> <u>GATAAAGCTATCGTC</u></p> | Underlined letters are upstream and downstream homologous arms, italic letters are J23119 promoter region, bold letters are part of the coding region of <i>accA</i> gene. |
| DNA fragment used for <i>accBC</i> promoter editing | <p><u>GCTGTTGATTATCTTCCCTGATAAGACCAG</u><br/> <u>TATTTAGCTGCCAATTGCTACGAAATCGTT</u><br/> <u>ATAATGTGCGACCTCGTCCTCCCTGACGC</u><br/> <u>AGTTTTTTCGCTGCGGAAAAGGTGACATT</u><br/> <u>GGCGCAACGAAGGTATATTTTGTTTTTGC</u><br/> <u>CGGAGGATAGCAGCAGATCGCTGCACAAT</u><br/> <u>GTCCGTCAAGTCTAACATTGACACTCTGG</u><br/> <u>GGCAAATAGACCGGCGTCCCGGCCTGCT</u><br/> <u>GGAATTTATCGCTATGCATACAGCTGTGC</u><br/> <u>GGGCATACGCTTTACAGACGGCGGTGAAA</u><br/> <u>CGCCTGTCACATTGACAGCTAGCTCAGTCCT</u><br/> <i>AGGTATAATGCTAGCTAATAGAAATAATTTG</i><br/> <i>TTAACTTTAAAGTTAAGAGGCAAGAATGCAT</i><br/> <u>CATCACCATCACCATGGATATTCGTAA</u><br/> <u>GATTAAAAACTGATCGAGCTGGTTGA</u><br/> <u>AGAATCAGGCATCTCCGAACTGGAAT</u><br/> <u>TTCTGAAGGCGAAGAGTCAGTACGCAT</u><br/> <u>TAGCCGTGCAGCTCCTGCCGCAAGTTT</u><br/> <u>CCCTGTGATGCAACAAGCTTACGCTGC</u></p>                                                                                                                                                    | Underlined letters are upstream and downstream homologous arms, italic letters are J23119 promoter region, bold letters are part of the coding region of <i>accB</i> gene. |

|                                                                  |                                                                                                                                                                                                                                                                                                                                                                                                                                                                                                                                                                                                                                                                                                                                                                                                                                                                                                                                                                                                                                                                                                             |                                                                                                                                                                                  |
|------------------------------------------------------------------|-------------------------------------------------------------------------------------------------------------------------------------------------------------------------------------------------------------------------------------------------------------------------------------------------------------------------------------------------------------------------------------------------------------------------------------------------------------------------------------------------------------------------------------------------------------------------------------------------------------------------------------------------------------------------------------------------------------------------------------------------------------------------------------------------------------------------------------------------------------------------------------------------------------------------------------------------------------------------------------------------------------------------------------------------------------------------------------------------------------|----------------------------------------------------------------------------------------------------------------------------------------------------------------------------------|
|                                                                  | <p><u>ACCAATGATGCAGCAGCCAGCTCAATC</u><br/> <u>TAACGCAGCCGCTCCGGCGACCGTTCC</u><br/> <u>TTCCATGGAAGCGCCAGCAGCAGCGGA</u><br/> <u>AATCAGTGGTCACATCGTACGTTCCCCG</u><br/> <u>ATGGTTGGTACTTTCTACCGCACCCCAA</u><br/> <u>GCCCGGACGCAAAAGCGTTCATCGAAG</u><br/> <u>TGGGTCAGAAAGTCAACGTGGGCGATA</u><br/> <u>CCCTGTGCATCGTTGAAGCCATGAAAAT</u><br/> <u>GATGAACCAGATCGAAGC</u></p>                                                                                                                                                                                                                                                                                                                                                                                                                                                                                                                                                                                                                                                                                                                                         |                                                                                                                                                                                  |
| <p>DNA fragment<br/>used for <i>acs</i><br/>promoter editing</p> | <p><u>CACGACAGTAACCGCACCTACACTGTCAT</u><br/> <u>GACATTGCTCGCCCCTATGTGTAACAAAT</u><br/> <u>AACCACACTGTGAATGTTGTCTTTAATCA</u><br/> <u>ATTGTAAGTGCATGTAATAATACCACTTA</u><br/> <u>GAGTTAGTTAGTATCTTCCTCTTTTTCAAC</u><br/> <u>AGCATGCATAACTGCATGTTCTCAAAGA</u><br/> <u>ATTAATCAACTTTTGTTGCTGACCTTCAA</u><br/> <u>AATTACCCTGCCGTTTATTTGCACAATTCT</u><br/> <u>ACTTTTGCGTGATCTGTCGCCCAAATACTA</u><br/> <u>AACAAAACCTGCCAATACCCCTACATTTAA</u><br/> <u>CGCTTATGCCATTGACAGCTAGCTCAGTCCT</u><br/> <u>AGGTATAATGCTAGCTAATAGAAATAATTTG</u><br/> <u>TTAACTTTAAAGTTAAGAGGCAAGAATGCAT</u><br/> <u>CATCACCATCACCACATGAGCCAAATTCA</u><br/> <u>CAAACACACCATTCTGCCAACATCGCA</u><br/> <u>GACCGTTGCCTGATAAACCCCTCAGCAG</u><br/> <u>TACGAGGCGATGTATCAACAATCTATTA</u><br/> <u>ACGTACCTGATACCTTCTGGGGCGAAC</u><br/> <u>AGGGAAAAATTCTTGACTGGATCAAAC</u><br/> <u>CTTACCAGAAGGTGAAAAACACCTCCTT</u><br/> <u>TGCCCCCGGTAATGTGTCCATTAATGG</u><br/> <u>TACGAGGACGGCACGCTGAATCTGGCG</u><br/> <u>GCAAACCTGCCTTGACCGCCATCTGCAA</u><br/> <u>GAAAACGGCGATCGTACCGCCATCATC</u><br/> <u>TGGGAAGGCGACGACGCCAGCCAGAGC</u><br/> <u>AAACATATCAGC</u></p> | <p>Underlined letters are upstream and downstream homologous arms, italic letters are J23119 promoter region, bold letters are part of the coding region of <i>acs</i> gene.</p> |

Information of genes used in this study:

Gene: *At4CL*

GenBank: KX817185.1

Codon optimized DNA sequence:

ATGGCGCCGCAGGAACAGGCGGTTTCTCAGGTTATGGAAAAACAGTCTAA  
CAACAACAACCTCTGACGTTATCTTCCGTTCTAAACTGCCGGACATCTACAT  
CCCGAACCACCTGTCTCTGCACGACTACATCTTCCAGAACATCTCTGAATT  
CGCGACCAAACCGTGCCTGATCAACGGTCCGACCGGTCACGTTTACACCT  
ACTCTGACGTTACGTTATCTCTCGTCAGATCGCGGCGAACTTCCACAAAC  
TGGGTGTTAACCAGAACGACGTTGTTATGCTGCTGCTGCCGAACTGCCCG  
GAATTCGTTCTGTCTTTCCTGGCGGCGTCTTTCGTTGGTGCACCGCGACC  
GCGGCGAACCCTTCTTACCCCGGCGGAAATCGCGAAACAGGCGAAAG  
CGTCTAACACCAAACCTGATCATCACCGAAGCGCGTTACGTTGACAAAATC  
AAACCGCTGCAGAACGACGACGGTGTGTTATCGTTTGCATCGACGACAA  
CGAATCTGTTCCGATCCCGGAAGGTTGCCTGCGTTTACCGAACTGACCCA  
GTCTACCACCGAAGCGTCTGAAGTTATCGACTCTGTTGAAATCTCTCCGGA  
CGACGTTGTTGCGCTGCCGTACTCTTCTGGTACCACCGGTCTGCCGAAAGG  
TGTTATGCTGACCCACAAAGGTCTGGTTACCTCTGTTGCGCAGCAGGTTGA  
CGGTGAAAACCCGAACCTGTACTTCCACTCTGACGACGTTATCCTGTGCGT  
TCTGCCGATGTTCCACATCTACGCGCTGAACTCTATCATGCTGTGCGGTCT  
GCGTGTGTTGGTGCAGGCGATCCTGATCATGCCGAAATTCGAAATCAACCTGC  
TGCTGGAACCTGATCCAGCGTTGCAAAGTTACCGTTGCGCCGATGGTTCCG  
CCGATCGTTCTGGCGATCGCGAAATCTTCTGAAACCGAAAAATACGACCT  
GTCTTCTATCCGTGTTGTTAAATCTGGTGCAGGCGCCGCTGGGTAAAGAACT  
GGAAGACGCGGTTAACGCGAAATTCGGAACGCGAAACTGGGTGAGGGT  
TACGGTATGACCGAAGCGGGTCCGGTCTGGCGATGTCTCTGGGTTTCGC  
GAAAGAACCCTTCCCGTTAAATCTGGTGCCTGCGGTACCGTTGTTTCGTA  
ACGCGGAAATGAAAATCGTTGACCCGGACACCGGTGACTCTCTGTCTCGT  
AACCAGCCGGGTGAAATCTGCATCCGTGGTACCAGATCATGAAAGGTTA  
CCTGAACAACCCGGCGGCGACCCGCGGAAACCATCGACAAAGACGGTTGG  
CTGCACACCGGTGACATCGGTCTGATCGACGACGACGACGAACTGTTTCAT  
CGTTGACCGTCTGAAAGAACTGATCAAATACAAAGGTTTCCAGGTTGCGC  
CGGCGGAACTGGAAGCGCTGCTGATCGGTCACCCGGACATCACCGACGTT  
GCGGTTGTTGCGATGAAAGAAGAAGCGGCGGGTGAAGTTCCGGTTGCGTT  
CGTTGTTAAATCTAAAGACTCTGAACTGTCTGAAGACGACGTTAAACAGT  
TCGTTTCTAAACAGGTTGTTTCTACAAACGTATCAACAAAGTTTTCTTCA  
CCGAATCTATCCCGAAAGCGCCGTCTGGTAAAATCCTGCGTAAAGACCTG  
CGTGCGAAACTGGCGAACGGTCTGTAA



Gene: *VvSTS*

GenBank: NM\_001281010.1

Codon optimized DNA sequence:

ATGGCGTCTGTTGAAGAATTCCGTAACGCGCAGCGTGCGAAAGGTCCGGC  
GACCATCCTGGCGATCGGTACCGCGACCCCGGACCACTGCGTTTACCAGT  
CTGACTACGCGGACTACTACTTCCGTGTTACCAAATCTGAACACATGACC  
GAACTGAAAAAAAATTCAACCGTATCTGCGACAAATCTATGATCAAAAA  
ACGTTACATCCACCTGACCGAAGAAATGCTGGAAGAACCCCGAACATCG  
GTGCGTACATGGCGCCGTCTCTGAACATCCGTCAGGAAATCATCACCGCG  
GAAGTTCGCGCTCTGGGTCGTGACGCGGCGCTGAAAGCGCTGAAAGAATG  
GGGTCAGCCGAAATCTAAAATCACCCACCTGGTTTTCTGCACCACCTCTGG  
TGTTGAAATGCCGGGTGCGGACTACAACTGGCGAACCTGCTGGGTCTGG  
AAACCTCTGTTTCGTCTGTTATGCTGTACCACCAGGGTTGCTACGCGGGTG  
GTACCGTTCGCGTACCGCGAAAGACCTGGCGGAAAACAACGCGGGGTGCG  
CGTGTTCTGGTTGTTTGCTCTGAAATCACCGTTGTTACCTCCGTGGTCCGT  
CTGAAGACGCGCTGGACTCTCTGGTTGGTCAGGCGCTGTTTCGGTGACGGT  
TCTTCTGCGGTTATCGTTGGTTCTGACCCGGACGTTTCTATCGAACGTCCG  
CTGTTCCAGCTGGTTTCTGCGGCGCAGACCTTCATCCCGAACTCTGCGGGT  
GCGATCGCGGGTAACCTGCGTGAAGTTGGTCTGACCTTCCACCTGTGGCC  
GAACGTTCCGACCCTGATCTCTGAAAACATCGAAAAATGCCTGACCCAGG  
CGTTCGACCCGCTGGGTATCTCTGACTGGAACCTCTCTGTTCTGGATCGCGC  
ACCCGGGTGGTCCGGCGATCCTGGACGCGGTTGAAGCGAACTGAACCTG  
GAAAAAAAATACTGGAAGCGACCCGTCACGTTCTGTCTGAATACGGTAA  
CATGTCTTCTGCGTGCGTTCTGTTTCATCCTGGACGAAATGCGTAAAAAATC  
TCTGAAAGGTGAAAAAGCGACCACCGGTGAAGGTCTGGACTGGGGTGTTT  
TGTTTCGGTTTCGGTCCGGGTCTGACCATCGAAACCGTTGTTCTGCACTCTG  
TTCCGACCGTTACCAACTAA

Gene: *IacE*

GenBank: XM\_007832623.1

DNA sequence:

ATGGCTATCTCAACCCCTTCCAACGGCGTAAGCCATGTCGCAAAGCCTCT  
ACCCAACCTGAAAGAGGTCAATAAAGGCATTGAGACAGACAGTGAAGAC  
CGAGCCTTCTGGTGGGGTGCCTTGTCTGAGCCTTTGGCCTCGCTCCTCGAG  
GCAAATCACTACACCAAGGAAGTGCAACTTCACTACCTCCGTTGGTTTTAC  
CAATGGATTCTACCGGCTCTGGGGCCACGACCTCTCGACGGCAAACCCTA  
TTACGGGTCTTGGATTACTCATGATTTGTCGCCCTTTGAGTACAGTCTCAA  
TTGGAAAGAAAAGAGTTCCAAACAGACCATCCGTTTCACTATTGAGGCGG

TTACGAAGCAGTCTGGCACAGCCAGCGATCCTATCAACCAGCTCGGGCGCA  
AAGGAGTTCCTGGAAGCAGTCTCCAAGGATGTTCTTGGTATGGATCTCAC  
GCGATTCAACCAGTTTCTTGAGGCAACCAACGTACCCAACGACTGCGTAG  
ATGATGCCATTGCAAAGCACCCAGCACACTTCCCTCGCAGCCGCGTTTGG  
ATCGCTTTTGACTTGGAGCACTCTGGCAACCTTATGGCCAAGTCATACTTC  
CTGCCGCATTGGCGTGCGATCCAGAGCGGTATCTCGGCCAATACCATCAT  
TGCGGATACGGTCAAGGAGTGCAACAAGGCGGACGGTTCGTCTGACGAC  
GGGTGCTGAACGCCATTGAGTCGTACCTGGCAACGTTACGCGACCGGA  
GGAGGCGCCGCAGATGGGACTGCTGTCAAATGACTGCGTGGCCGAAACG  
CCCGGCTCGCGCCTCAAGGTCTATTTCCGCTCCTCGGCGGACACGCTCGCC  
AAGGCCAAGGACATGTACAACCTGGGTGGCCGCCTGAAGGGCCCAAGA  
TGGATGCCAGCCTCAAGGGTATCAGTGATTTCTGGTACCACCTGTTTGGCC  
TCGACAGCTCCGACCCGGCCTCTGATGACAAGGTCTGTATCGGCAACCAC  
AAGTGCATTTTCGTCTACGAGATGCGCTCCTCGCAAGGCTCGGAGCCGA  
TATTGATGTCAAGTTCCACATCCCAATGTGGCAGCTTGGTAAGACGGATG  
GGCAGATTAGCGAGCTGCTGGCTTCTTGGTTCGAGAGCCATGGTCACCCT  
GATCTCGCCTCGAGGTATAAGTCTGACTTGGGCACGGCATTTCCTCAAGCA  
CAATATTACGGGCAAGAGTGTAGGAACCCATACTTACATCTCCATCACTC  
ACACACCCAAGACGGGATTGTACATGACCATGTATCTCAGCCCGAAACTG  
CCCGAGTTCTACTACTAA

Gene: *accA*

GenBank: NC\_012892 (*E. coli* BL21(DE3) genome)

DNA sequence:

ATGAGTCTGAATTCCTTGATTTTGAACAGCCGATTGCAGAGCTGGAAGC  
GAAAATCGATTCTCTGACTGCGGTTAGCCGTCAGGATGAGAACTGGATA  
TTAACATCGATGAAGAAGTGCATCGTCTGCGTGAAAAAAGCGTAGAACTG  
ACACGTAAAATCTTCGCCGATCTCGGTGCATGGCAGATTGCGCAACTGGC  
ACGCCATCCACAGCGTCCTTATACCCTGGATTACGTTTCGCTGGCATTGA  
TGAATTTGACGAACTGGCTGGCGACCGCGCGTATGCAGACGATAAAGCTA  
TCGTTCGGTGGTATCGCCCGTCTCGATGGTTCGTCCGGTGGTATGATCATTGGTC  
ATCAAAAAGGTCGTGAAACCAAAGAAAAAATTCGCCGTAACTTTGGTATG  
CCAGCGCCAGAAGGTTACCGCAAAGCACTGCGTCTGATGCAAATGGCTGA  
ACGCTTTAAGATGCCAATCATCACCTTTATCGACACCCCGGGGGCTTATCC  
GGGCGTGGGCGCAGAAGAGCGCGGTTCAGTCTGAAGCCATTGCACGCAAC  
CTGCGTGAAATGTCTCGCCTTAGCGTACCGACTATTTGTACCGTTATCGGT  
GAAGGTGGTTCTGGCGGCGCGCTGGCGATTGGCGTGGGCGATAAAGTGAA  
TATGCTGCAATACAGCACCTATTCCGTTATCTCGCCGGAAGGTTGTGCGTC  
CATTCTGTGGAAGAGCGCTGATAAAGCGCCGCTGGCGGCTGAAGCGATGG  
GTATCATCGCTCCGCGTCTGAAAGAATAAACTGATCGACTCCATCATC

CCAGAACCGCTGGGTGGTGCTACCGTAACCCGGAAGCGATGGCGGCATC  
GTTGAAAGCGCAACTGTTGGCGGATCTGGCCGATCTCGACGTGTTAAGCA  
CTGAAGATTTAAAAAATCGTCGTTATCAGCGCCTGATGAGCTACGGTTAC  
GCGTAA

Gene: *accBC*

GenBank: NC\_012892 (*E. coli* BL21(DE3) genome)

DNA sequence (the *AccB* coding sequence was underlined, *AccC* coding sequence was in bold):

ATGGATATTCGTAAGATTA**AAAAA**ACTGATCGAGCTGGTTGAAGAATCAGG  
CATCTCCGAACTGGAAATTTCTGAAGGCGAAGAGTCAGTACGCATTAGCC  
GTGCAGCTCCTGCCGCAAGTTTCCCTGTGATGCAACAAGCTTACGCTGCAC  
CAATGATGCAGCAGCCAGCTCAATCTAACGCAGCCGCTCCGGCGACCGTT  
CCTTCCATGGAAGCGCCAGCAGCAGCGGAAATCAGTGGTCACATCGTACG  
TTCCCCGATGGTTGGTACTTTCTACCGCACCCCAAGCCCGGACGCAAAAAG  
CGTTCATCGAAGTGGGTCAGAAAGTCAACGTGGGCGATACCCTGTGCATC  
GTTGAAGCCATGAAAATGATGAACCAGATCGAAGCGGACAAATCCGGTA  
CCGTGAAAGCAATTCTGGTTCGAAAGTGGACAACCGGTAGAATTTGACGAG  
CCGCTGGTCGTCATCGAGTAA**CGAGGCGAACATGCTGGATAAAAATTGTT**  
**ATTGCCAACCGCGGGCGAGATTGCATTGCGTATTCTTCGTGCCTGTAAA**  
**GAACTGGGCATCAAGACTGTCGCTGTGCACTCCAGCGCGGATCGCGA**  
**TCTAAAACACGTATTACTGGCAGATGAAACGGTCTGTATTGGCCCTGC**  
**TCCGTCAGTAAAAAGTTATCTGAACATCCCGGCAATCATCAGCGCCG**  
**CTGAAATCACCGGCGCAGTAGCAATCCATCCGGGTTACGGCTTCCTC**  
**TCCGAGAACGCCAACTTTGCCGAGCAGGTTGAACGCTCCGGCTTTAT**  
**CTTCATTGGCCC****GAAAGCAGAAACCATT****CGCCTGATGGGCGACAAAG**  
**TATCCGCAATCGCGGCGATGAAAAAAGCGGGCGTCCCTTGCGTACCG**  
**GGTTCGACGGCCCGCTGGGCGACGATATGGATAAAAACCGTGCCAT**  
**TGCTAAACGCATTGGTTATCCGGTGATTATCAAAGCCTCCGGCGGGCG**  
**GCGGCGGTTCGCGGTATGCGCGTAGTGCGCGGGCGACGCTGAACTGGC**  
**ACAATCCATCTCCATGACCCGTGCGGAAGCGAAAGCTGCTTTCAGCA**  
**ACGATATGGTTTACATGGAGAAATACCTGGAAAATCCTCGCCACGTC**  
**GAGATTCAGGTA****CTGGCTGACGGTCAGGGCAACGCTATCTATCTGGC**  
**GGAACGTGACTGCTCCATGCAACGCCGCCACCAGAAAGTGGT****CGAAG**  
**AAGCGCCAGCACCGGGCATTACCCCGGAACTGCGT****CGCTACATCGGC**  
**GAACGTTGCGCTAAAGCGTGTGTTGATATCGGCTATCGCGGTGCAGG**  
**TACTTTCGAGTTCCTGTT****CGAAAACGGCGAGTTCTATTT****CATCGAAAT**  
**GAACACCCGTATTCAGGTAGAACACCCGGTTACAGAAATGATCACCG**  
**GCGTTGACCTGATCAAAGAACAGCTGCGTATCGCTGCCGGTCAACCG**

CTGTTCGATCAAGCAAGAAGAAGTTCACGTTTCGCGGCCATGCGGTGGA  
ATGTTCGTATCAACGCCGAAGATCCGAACACCTTCCTGCCAAGTCCGG  
GCAAATCACCCGTTTCCACGCACCTGGCGGTTTTGGCGTACGTTGG  
GAGTCTCATATCTACGCGGGCTACACCGTACCGCCGTAATGACTC  
AATGATCGGTAAGCTGATTTGCTACGGTGAAAACCGTGACGTGGCGA  
TTGCCCGCATGAAGAATGCGCTGCAGGAGCTGATCATCGACGGTATC  
AAAACCAACGTTGATCTGCAGATCCGCATCATGAATGACGAGAATT  
CCAGCATGGTGGCACTAACATCCACTATCTGGAGAAAAAACTCGGTC  
TTCAGGAAAAATAA

Gene: *acs*

GenBank: NC\_012892 (*E. coli* BL21(DE3) genome)

DNA sequence:

ATGAGCCAAATTCACAAACACACCATTTCCTGCCAACATCGCAGACCGTTG  
CCTGATAAACCTCAGCAGTACGAGGCGATGTATCAACAATCTATTAACG  
TACCTGATACCTTCTGGGGCGAACAGGGAAAAATTCTTGACTGGATCAA  
CCTTACCAGAAGGTGAAAAACACCTCCTTTGCCCCCGTAATGTGTCCATT  
AAATGGTACGAGGACGGCACGCTGAATCTGGCGGCAAACCTGCCTTGACCG  
CCATCTGCAAGAAAACGGCGATCGTACCGCCATCATCTGGGAAGGCGACG  
ACGCCAGCCAGAGCAAACATATCAGCTATAAAGAGCTGCACCGCGACGTC  
TGCCGCTTCGCCAATACCCTGCTCGAGCTGGGCATTAAAAAAGGTGATGT  
GGTGGCGATTTATATGCCGATGGTGCCGGAAGCCGCGGTTGCGATGCTGG  
CCTGCGCCCGCATTGGCGCGGTGCATTCGGTGATTTTCGGCGGCTTCTCGC  
CGGAAGCCGTTGCCGGGCGCATTATTGATTCCAACCTCACGACTGGTGATC  
ACTTCCGACGAAGGTGTGCGTGCCGGGCGCAGTATTCCGCTGAAGAAAA  
CGTTGATGACGCGCTGAAAAACCCGAACGTCACCAGCGTAGAGCATGTGG  
TGGTACTGAAGCGTACTGGCGGGAAAAATTGACTGGCAGGAAGGGCGCGA  
CCTGTGGTGGCACGACCTGGTTGAGCAAGCGAGCGATCAGCACCGGCGG  
AAGAGATGAACGCCGAAGATCCGCTGTTTATTCTCTACACCTCCGGTTCTA  
CCGGTAAGCCAAAAGGTGTGCTGCATACTACCGGCGGTTATCTGGTGTAC  
GCGGCGCTGACCTTTAAATATGTCTTTGATTATCATCCGGGTGATATCTAC  
TGGTGCACCGCCGATGTGGGCTGGGTGACCGGACACAGTTACTTGCTGTA  
CGCCCCGCTGGCCTGCGGTGCGACCACGCTGATGTTTGAAGGCGTACCGA  
ACTGGCCGACGCCTGCCCGTATGGCGCAGGTGGTGGACAAGCATCAGGTC  
AATATTCTCTATACCGCGCCCACGGCGATTCGCGCGCTGATGGCGGAAGG  
GGATAAAGCGATTGAAGGCACCGACCGATCGTCGCTGCGCATTCTCGGTT  
CCGTGGGCGAGCCAATCAACCCGGAAGCGTGGGAGTGGTACTGGAAAAA  
AATCGGCAACGAGAAATGTCCGGTGGTTCGATACCTGGTGGCAGACCGAA  
ACTGGCGGTTTCATGATCACGCCGCTGCCTGGCGCTACCGAGCTGAAAGC  
CGGTTCCGGCAACACGTCCGTTCTTCGGCGTGCAACCGGCGCTGGTTCGATA

ACGAAGGTAACCCGCTGGAAGGCGCTACCGAAGGCAGCCTGGTGATCAC  
CGACTCCTGGCCGGGTCAGGCGCGTACGCTGTTTGGCGATCACGAACGTT  
TTGAACAGACCTACTTCTCCACCTTCAAAAATATGTATTTAGCGGGCGACG  
GCGCGCGTCGCGATGAAGATGGCTATTACTGGATAACCGGGCGTGTGGAC  
GATGTGCTGAACGTCTCCGGTCACCGTCTGGGAACGGCGGAGATTGAGTC  
GGCGCTGGTGGCGCATCCGAAGATTGCCGAAGCCGCCGTAGTAGGTATTC  
CGCACAATATTAAGGTCAGGCGATCTACGCCTACGTCACGCTTAATCAC  
GGGGAGGAACCGTCACCAGAAGTGTACGCAGAAGTCCGCAACTGGGTGC  
GTAAAGAGATTGGCCCGCTGGCGACGCCAGACGTGCTGCACTGGACCGAC  
TCCCTGCCTAAAACCCGCTCCGGCAAATTATGCGCCGTATTCTGCGCAA  
AATTGCGGGCGGGCGATAACCAGCAACCTGGGCGATACCTCGACGCTTGCCG  
ATCCTGGCGTAGTCGAGAAGCTGCTTGAAGAGAAGCAGGCTATCGCGATG  
CCATCGTAA

Gene: *gltA*

GenBank: NC\_012892 (*E. coli* BL21(DE3) genome)

DNA sequence:

ATGGCTGATACAAAAGCAAACTCACCCCTCAACGGGGACACAGCTGTTGA  
ACTGGATGTGCTGAAAGGCACGCTGGGTCAAGATGTTATTGATATCCGTA  
CTCTCGGTTCAAAGGTGTGTTACCTTTGACCCTGGCTTCACTTCAACCG  
CATCCTGCGAATCTAAAATTACTTTTATTGATGGTGATGAAGGTATTTTGC  
TGCACCGCGGTTTCCCGATCGATCAGCTGGCGACCGATTCTAACTACCTGG  
AAGTTTGTACATCCTGCTGAATGGTGAAAAACCGACTCAGGAACAGTAT  
GACGAATTTAAAACACTACGGTGACCCGTCATACCATGATCCACGAGCAGAT  
TACCCGTCTGTTCCACGCTTCCGTCGCGACTCACATCCAATGGCAGTCAT  
GTGTGGTATTACCGGCGCGCTGGCGGGCGTTCTATCACGACTCGCTGGATGT  
TAACAATCCTCGTCATCGTGAAATTGCCGCGTTCCGCCTGCTGTCGAAAAT  
GCCGACCATGGCAGCGATGTGTTACAAGTATTCCATTGGTCAGCCATTTGT  
TTACCCGCGCAACGATCTCTCCTACGCCGGTAACTTCTGAATATGATGTT  
CTCTACGCCGTGCGAACCGTATGAAGTTAATCCGATTCTGGAACGTGCTAT  
GGACCGTATTTTGATCCTGCACGCTGACCATGAACAGAACGCCTCCACCT  
CCACCGTGCGTACCGCTGGCTCTTCGGGTGCGAACCCGTTTGCCTGTATCG  
CAGCAGGTATTGCTTCACTGTGGGGACCTGCGCACGGTGGTGCTAACGAA  
GCAGCGCTGAAAATGCTGGAAGAAATCAGCTCCGTTAAACACATTCCGGA  
ATTTGTTTCGTCGTGCGAAAGATAAAAATGATTCTTTCCGCCTGATGGGCTT  
CGGTCACCGCGTGTACAAAATTACGACCCGCGCGCCACCGTAATGCGTG  
AAACCTGCCATGAAGTGCTGAAAGAGCTGGGCACGAAGGATGACCTGCT  
GGAAGTGGCTATGGAGCTGGAAAACATCGCGCTGAACGACCCGTACTTTA  
TCGAGAAGAACTGTACCCGAACGTCGATTTCTACTCTGGTATCATCCTGA  
AAGCGATGGGTATTCCGTCTTCCATGTTACCGTCATTTTCGCAATGGCAC

GTACCGTTGGCTGGATCGCCCACTGGAGCGAGATGCACAGTGACGGTATG  
AAGATTGCCCGTCCGCGTCAGCTGTATACAGGATATGAAAAACGCGACTT  
TAAAAGCGATATCAAGCGTTAA

Gene: *acpS*

GenBank: NC\_012892 (*E. coli* BL21(DE3) genome)

DNA sequence:

ATGGCAATATTAGGTTTAGGCACGGATATTGTGGAGATCGCTCGCATCGA  
AGCGGTGATCGCCCGATCCGGTGATCGCCTGGCACGCCGCGTATTAAGCG  
ATAACGAATGGGCAATCTGGAAAACGCACCACCAGCCGGTGCGTTTTCTG  
GCGAAGCGTTTTGCTGTGAAAGAAGCCGCAGCAAAGCGTTTGGCACCGG  
GATCCGCAATGGTCTGGCGTTTAATCAATTTGAAGTATTCAATGATGAGCT  
CGGCAAACCACGGCTACGGCTATGGGGCGAGGCATTAAACTGGCGGAA  
AAGCTGGGCGTTGCAAATATGCATGTAACGCTGGCAGATGAGCGGCACTA  
TGCTTGTGCCACGGTAATTATTGAAAGTTAA

Gene: *acpT*

GenBank: NC\_012892 (*E. coli* BL21(DE3) genome)

DNA sequence:

ATGTATCGGATAGTTCTGGGGAAAGTTTCGACCTTAAGCGCAGCTCCACT  
GCCACCGGGTTTACGCGAGCAAGCACCGCAAGGTCCACGACGCGAACGCT  
GGCTGGCGGGGCGTGCAATTGCTTTCGCACACGCTTCCCCGCTACCGGAG  
ATCATCTATGGCGAACAAGGCAAACCTGCATTTGCGCCGGAAATGCCGCT  
ATGGTTCAACTTAAGCCATAGCGGTGACGATATCGCCCTGCTGTTGAGTG  
ATGAAGGCGAAGTCGGCTGCGATATCGAAGTGATTCGCCC GCGCGCCAAC  
TGCGCTGGCTGGCGAACGCCGTATTCAGCCTCGGGGAACACGCTGAGAT  
GGACGCCGTGCATCCTGATCAGCAACTGGAAATGTTCTGGCGCATCTGGA  
CGCGCAAAGAAGCCATCGTTAAACAGCGTGGCGGCAGCGCCTGGCAAAT  
CGTCAGCGTAGACAGCACCTATCACTCCTCGCTGTCAGTCAGCCATTGTCA  
GCTTGAAAATTTAAGCCTTGCGATCTGCACCCCTACTCCCTTACGCTCAC  
CGCCGACAGTGTGCCATGGATCGATTTCAGTTAACTGA

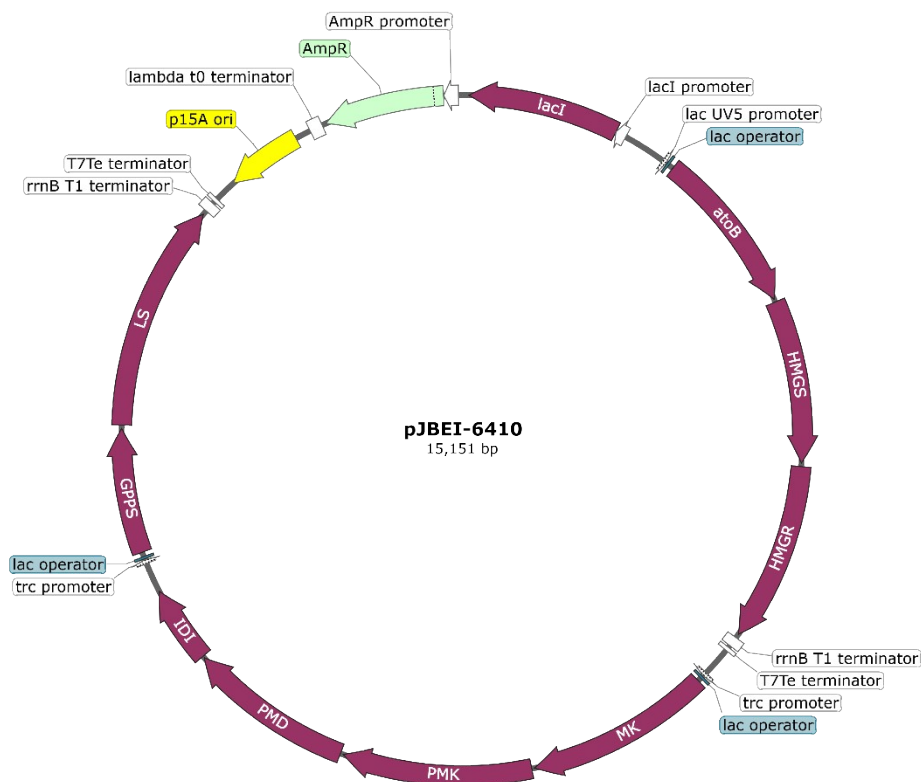

Fig. S1 The structure illustration of plasmid pJBEI-6410. The MTSA operon containing genes for the conversion of acetyl CoA to mevalonate was expressed by lac UV5 promoter. AtoB: acetoacetyl-CoA synthase from *E. coli*; HMGS: HMG-CoA synthase from *Staphylococcus aureus* codon optimized for *E. coli*; HMGR: HMG-CoA reductase from *S. aureus* codon optimized for *E. coli*. MBI operon containing genes for the conversion of mevalonate to isoprenoid precursors (IPP and DMAPP) was expressed by trc promoter. MK: Mevalonate Kinase, PMK: Phosphomevalonate Kinase, and PMD: Phosphomevalonate Decarboxylase were from *Saccharomyces cerevisiae*; IDI: isopentenyl diphosphate isomerase from *E. coli*. GPPS: Geranyl pyrophosphate synthase from *Abies grandis* and codon optimized for *E. coli*; LS: Limonene synthase from *Mentha spicata*, a truncated version without plastidial targeting sequence and codon optimized for *E. coli*<sup>29</sup>.

Plasmid sequence of pJBEI-6410:

gacgtcggcctaataagtagtaacttacattaattgcgttgcgctcactgccgcttccagtcgggaaacctgctg  
ccagctgcattaatgaatcgccaacgcgcggggagagggcgtttgcgtattggggccaggggtggttttctttaccag  
tgagacgggcaacagctgattgccctcaccgctggccctgagagagttgcagcaagcggccacgctggttggccca  
gcagggcaaaatcctgttgatgggtgtaaacggcgggataaacatgagctgtctcggatcgtcgtatcccactaccgag  
atgtccgcaccaacgcgcagcccggactcggtaatggcgcgattgcgcccagcggcattctgatcgttggcaaccagcat  
cgcagtgggaaacgatgccctcattcagcatttgcattggtttgtaaaaccggacatggcactccagtcgcttcccgttccg  
ctatcggctgaatttgattgcgagtgagatattatgccagccagccagacgcagacgcgcccagacagaacttaattggg  
ccgtaaacagcgcgatttgcgtggtgacccaatgcgaccagatgctccacgcccagtcgctaccgtcttcatgggagaaa  
ataatactggtgatgggtgctggtcagagacatcaagaataacgccggaacattagtgcaggcagcttccacagcaatg  
gcatcctggtcatccagcggatagtaatgatcagcccactgacgcgttgcgcgagaagattgtgaccgcccgtttacag  
gcttcgacggcgttcttaccatcgacaccaccgctggcaccagttgatcggcgcgagatttaacgcccgcgaca  
atttgcgacggcgcgctgcagggccagactggaggtggcaacccaatcagcaacgactgttggcccagttgttgc  
cacgcggttgggaatgtaattcagctccgccatgccgcttccacttttcccgcgttttcgagaaacgtggctggcctggt  
caccacgcccgaacggctgataagagacaccggcatactctgcgacatcgtataacgttactggtttcacattcaccacc  
ctgaattgactcttcccgggcgctatcatgccataaccgcgaaagggtttgcgccattcaggtgtcggggatctcgacgct  
ctcccttatgcgactcctgattaggaagcagcccagtagtaggttgaggccgttgagcaccgcccgcgaaggaatggt  
gcatgcaaggagatggcggccaacagtcccccggccacggggcctgccaccatacccacggcgaacaagcgtcat  
gagcccgaatggcgagcccgatcttcccacgggtgatgctggcgatataggcgccagcaaccgcacctgtggcgccc  
gtgatccggccacgatgctcggcgtagaggatcgagatcgtttaggcaccacggcctttactttatgcttccggctc  
gtataatgtgtggaatttgagcgggataacaattcagaattcaaaagatcttaggaggaatataaaatgaaaattgtgcat  
cgtcagtgccgtactgctatcggtagtttaacgggtcactcgttccaccagcggcattcagctggggggcagagta  
atfaaacggccattgaacgtgcaaaaatcgaacacacgttgatgaagtattatgggtaacgtgttacaagccgggc  
tggggcaaaatccggcgcgtcaggcactgttaaaaaggcggctggcagaaacgggtgctgggattcacggtcaataaagt  
atgtggtcgggtcttaaaagtgtggcgttccgcccaggccattcaggcaggtcaggcgcagagcattgtggcggggg  
gtatggaaaatagtttagccccctacttactcgatgcaaaagcacgctctggtatcgtcttgagacggacaggttatg  
acgtaatctcgcgatggcctgatgtgccaccatggttatcatatggggattaccgcccgaacgtggctaaagagt  
acggaattaccggtgaaatgcaggtgaactggcgtcattcacagcgtaaagcggcagccgcaattgagtcgggtgctt  
ttacagccgaaatcgtcccggtaaatgttgcactcgaagaaaaccttcttctcagtcagagcaggtcccgaagcga  
ctcaacggctgaagcgttaggtgattgcgccggccttcgataaagcaggaacagtcaccgctgggaacgcgtctggt  
ttaacgacgggtgctgccgctctggtgattatggaagaatcgcggcgtggcagcagccttaccacctggtcgcattaa  
aagttatgccagcgggtggcgtgccccccgattgatgggtatggggccagctaccgcccgaacggcttacaactgg  
cggggctgcaactggcggatattgatctcattgaggtaaatgaagcatttgcacagttccttggcgttgggaaaaacctg  
ggctttgattctgagaaagtgaatgcaacggcggggccatcgcgctcgggcacatcctatcgggtccagtggtgctcgtatc  
tggtcactattacatgccatgcaggcacgcgataaacgctggggctggcaaacactgtgattggcggcggtcagggga  
attgcgatggtgattgaacgggtgaattgaggatctattcaggagaaaccttatgacaataggtatcgataaaataaactttac  
gttcaaaagtactatgtagacatggctaaattagcagaagcagccaagtagaccaacaataatttaattggaattggtca  
aactgaaatggctgttagtctgtaaaccaagacatcgtttcaatggcggcgtacgctgtaaggacattataacagacgaa  
gacaaaaagaaattggtatgtaatttggaactgaatcagcagttgatgctgctaaagcagccgctgttcaaatcaca  
cttattaggtattcaacctttgcacgctgcttgaatgaaagaagcttgttatgctgcaacaccagcaattcaattagctaaag  
attatttagcaactagaccgaatgaaaaagtattgattgtctacagatacagcacgttatggattgaactcagcggcgag  
ccaacacaaggtgctggcgcagttgcgatggttattgcataatccaagcattttggcattaaatgaagatgctgttcttac  
actgaagacgtttatgattctggcgtccaactggacataaatatccattagttgatggtgattatctaaagatgcttatccg  
ctcattccaacaagctggaatgaatcgcgaaacgtcaaggtaagtcgctagctgacttcgcatctctatgcttccatgttcc



attfacaanaatgggtaaaaaggcattagagtcaatcattgataacgctgatgaaacaactcaagagcgtttacgttcaggat  
atgaagatgctgtagattataaccgttatgctcgtaataatfatactggatcattatattaagcctaatacattactgaaaatcg  
agattacaagctggtgaaacaatcggttattcagttatggctcagggtcagttggtgaatfataagtcgacattagttgaag  
gctacaagatcatttagatcaagctgcacataaagcattattaataaacgtactgaagtatctgttgatgcatatgaaacatt  
ctcaaacgtttgatgacgttgaattgacgaagaacaagatgctgttcatgaagatgctatatttctacttatcaaatattga  
aataacgttcgcaatatacagaccagagtaattaggatctattcaggaaacagaccatgctcatgcaagtttagataag  
aatcttcgacatttatctcgtaaagaaaagttacaacaattggtgataagcaatggttatcagaagaacaattcgacattttact  
gaatcatccattaatcgtatgaagaagtagccaatagtttaattgaaaatgctatcgcgcaagggtgcattaccgttgattatta  
ccgaatatcattgtggacgataaggcatatgttgactatgatggtggaagagccttcagttgctgctgcagctagttatggt  
gcaagctagtgaatcagactggcggattaaaacggatcttctgaacgtattatgataggcaaatcgtctttgatggcgtt  
gacgatactgaaaaattatcagcagacattaaagctttagaaaagcaaatcataaaattgcggatgaggcatatcctctatt  
aaagcgcgtgggtggtggttaccacgtatagcgttatacatttctgagcaacagttactatcttaaaagattttggtgatac  
gaaagatgctatggcgctaatatgcttaatacgttttagagccataactgcatttttaaaaaatgaattccgcaaaagcga  
cattttaatgagttttatccaatcatgcaacagcgtccgttgtaaaagttcaaggcgaattgatgtaaaagatttagcaaggg  
gagagagaactggagaagaggttgcacaacgaatggaacgtgcttctgtattggccaagtagatattcatcgtgcagcaa  
cacataataaagggtgtatgaatggcacaatcgtgtgttttagcaacaggaatgatacgcgtggtgcagaagcaagtc  
gcatgatacgcgagtcgtgacggacagtatcgtgttctgctacatggcgttacgatcaagatcgtcaacgattgattggt  
caattgaaagtcctatgacattggcaatcgttggcgggtgtacaaaagtattaccaattgctaaagcttcattagagctactaa  
atgtagagtcagcacaagaattaggtcatgtagttgctgccgttggtttagcgcgcaaaactttgcagcatgctgcgcgcttgtg  
cagaaggtattcaacaaggtcatatgagttacaataataatcattagctatcgtttagggggcaaaaggtgatgaaattgcta  
aagtagctgaagctttgaaaaaagaaccccgcaaatacacaagcagcggcaacatattttacaagaattagacaacaat  
aattagatcttttaaggatctccaggcatcaataaaacgaaaggctcagtcgaaagactgggcctttcgtttatctgttgtt  
tctcgggtgaacgctctctactagagtcacactggctcaccttcgggtgggcctttctgctttatagcgaattggatctggtt  
acagcttactcagctgcacgggtgcaccaatgcttctggcgtcaggcagccatcggaaagctgtggtatggctgtgcaggt  
cgtaaatcactgcataatcgtgtcgtcaaggcgcactcccgttctggataatgttttgcgccgacatcataacggttctgg  
caaatattctgaaatgagctgttacaatcatccggctcgtataatgtgtggaattgtgagcggataacaatttcaggatc  
taggaggaataaccatgctctgccattcctgacgtctgcgccaggttaaggtgatcatctcggcagcactctgcgggt  
acaataagccggcctgcgccctctgtgtctgcttacgcacctactgctgatcagcgaatcttctgcaccggacacgat  
cgagctggactttccggacatcagcttcaaccacaagtgagcatcaacgacttcaacgcgatcacggaggaccaggtga  
acagccaaaagctggccaaagcccagcaagcaaccgacggtctgtctcaggagctggtgtctctgctgacccgctgtta  
gagcagtaagcagagcttccattaccacgccgcttctgcttctgtacatgttctgttgcctgtgcccgcacgcaagaa  
catcaagttcagcctgaagagcacgctgccgattggcgcaggcttaggctctagcgcactatcagcgtgagcctggcgt  
ggcgtatggcctatctgggtggcctgattggcagcaacgacctggagaaaactgagcgaaaacgacaagcactcgtgaac  
cagtgggcctttatcggcgagaagtgattcatggcaccggagcggcattgacaacgcagttgccacgtatggcaacgc  
cctgctgttcgagaaagacagccacaacggcacgatcaacacgaacaactcaagttcctggacgacttcccggcgtacc  
cgatgattctgacctacaccgtatcccacgcagcaccgaagatttagtcgcccgcgtgctgttttagtcaccgaaaagttc  
ccggaggtgatgaagccgatcctggacgcgatggcgagtgccgctgcagggtctggagatcatgaccaagctgagc  
aagtcaagggcaccgacgatgaggcgggtggagaccaaatgagctgtacgagcagctgctggagctgatccgtatca  
atcacggcctgctgtctctatcgtgtgtctcaccgggctggaactgatcaaaaactgagcgcacgactgctgctg  
gctctacgaaatcaacgggtgcaggtggcgggtgctcttfaacgctgctgcgcagtgacattacgcaggagcaaatcg  
acagcttcaagaagaagctgcaggacgactttagctacgagacgctgagacggacctggcggcagggctgttgcct  
gctgagcgcgcaaaaatctgaacaaggacctgaagatcaaaagcctggtgtccagctgttcgaaaacaagacgaccacga  
agcagcagatcagcagcctgttactgccgggtaaccaatctgccgtggacgtctttaggatctaggaggagatcatat  
gagcgaattacgtgacattcagcgcgccaggttaaggcactgctggcgggtggctacctggtgttagacaccaagtacgagg

cggtcgtcgtggcttatctgcccgtatgcatgcagttgccaccctgatggtagcctgcagggctctgacaagttcgaagtgcgtggaagagcaagcagttcaaggacggcgagtggtgtaccacattagcccaagagcggcttcatcccggttagcatggtggcagcaagaaccattatcgagaaggtcattgccaacgtctcagctactcaagccgaatatggacgattactgcaaccgcaacctgttcgtcatcgacattttcagcgacgacgcgtaccacagccaagaggactctgttacggagcatcgtggtaaccgccgctgagctccacagccatcgcattgaggaggtgccgaagacgggtctgggtctagcggcggttagttaccgtttaacgacggcggttagcgagcttctcgtgagcgacctggagaacaacgtggacaagtaccgcgaagtattcataccggcgacaggtggcacattgtcagggccaagtaagattggctctgggtttgatgtggcagcggccgctatggctctatccgctatcgcccgtttccgccggcctgatcagcaatctgccggacatcggctctgcgacgtatggtagcaaacgtggcgcactgggtggacgaggagactggaacatcaccattaagtctaatacctgccgagcggctaacgttatggatggcgatatacgaacggcagcgaaacgggtaagctgggtgcagaaagtgaaaaactggtacgacagccacatgccggaaagcctgaagattacacggagctggaccacgccaatagccgtttcatggatggtctgagcaagctggaccgctgcacgaaaccacgacgactacagcgaccaaatcttcgagagcctggagcgcaatgactgcacctgccagaagtaccggagatcacggaggtccgcgatgccgtggcaacgattcggcgtagcttccgaaaattacgaaggagagcggcgcgatatacgaaccgggtccagacgtctctgctggacgactgtcaaacctaaagggcgtgtaacgtgacctgattccggcgcggttggttacgacgccattgccgtcatcagaacaggacgtcgtatcgcgcgcaaacggccaacgacaacgtttcagcaagtcgaatggctggatggtacgcaggccgactgggggtgttcgcaaggagaaggaccggaaacgtatctggataagtgaggatctaggaggatttagagatgaccgtttacacagcatcgttaccgcaccgtcaacatcgcaacccttaagtattgggggaaaaggacacgaagtgaatctgccaccaatcgtccatatcagtgactttatcgcaagatgacctcagaacgttgacctctgcggctactgcaccgtagttgaaacgcgacactttgtggtaaatggagaaccacagcatcgacaatgaaagaactcaaaattgtctgcgcgactacgccaattaagaaggaatggaatcgaaggacgcctcattgccacattatcgaatggaactccacattgtctccgaaaataactttctacagcagctggttagcttctccgctgctggttgcattggtctctgcaattgtaagtataccaattaccacagtcactcagaaatctagaatagcaagaaagggctggttcagctttagatcgttgggtggcgatagtgccctgggaaatgggaaaagctgaagatggtcatgattccatggcagtaaaaatcgacagacgctctgactggcctcagatgaaagctgtgtcctagttgtcagcgatataaaaaggatgtgagttccactcagggtatgcaatgaccgtggcaacctccgaactattaaagaaagaattgaacatgtcgtaccaaagagattgaaatcgtcgtaaagccattgtgaaaaagattcgccacctttgcaaaaggaaacaatgatggattccaactttccatgccacatggttggactttccctccaatattctacatgaatgacacttccaagcgtatcatcagttggtgccacaccattaatcagttttacggagaaacaatcgttcatacacggttgatgcaggtccaatgctgtgttactacttagctgaaaatgagtcgaaactttgcatttatctataaattgttggctctgttctggatgggacaagaaattactactgagcagcttgaggctttcaaccatcaattgaaatcacttaactttactgcacgtgaaatggatcttgaagtgcaaaaggatgttgcagagtgatttaactcaagtcggttcaggcccacaagaaacaacgaatcttgattgacgcaagactggtctaccaaaaggaataaggatctaggaggtaatgataatgcaaacggaacacgtcattttatgaaatgcacagggagttcccacgggtacgctggaaaagtatccgcacacacggcagacaccgcttacatctcgcgttctcagttggctgttatagcaaaaaggacaattattagttaccggcgcgactgagcaaaaaagcatggcctggcgtgtggactaacctggtttggtggcaccacaactgggagaaaagcaacgaagacgcagtgatccgcttgcggttagagcttggcgtggaaattacgctcctgaatctatctctgactttcgtaccgcgccaccgatccgagtggtggtggtgaaatgaaatggtcggatattgccgcacgcaccactagtcggttacagatcaatgatgatgaagtgatggattatcaatggtgtgatttagcagatgtattacaggtattgatccacgccgtggcggtcagtcctggtgatgagcaggcgacaaatcgcaagccagaaaacgattatctgcaattaccagcttaaaataaggatctcgcaaaaaacccgcttcggcggggtttttcggcactgcacggtgcaccaatgcttctggcgtcaggcagccatcggaagctgtggtatggtctgacaggtcgtaaatcactgcataatcgtgtcgtcgaagggcactcccgttctggataatgtttttgcgccgacatcataacggttctggcaaatattctgaaatgagctgtgacaattaatcatccggctctgataatgtgtgaaatgtgagcggataacaatttcaggatctttaaagaaggagatatacatatggaattgacttcaacaatacatggactccaagcgtatgacggtaaatgaagcactgaacaaagcgtccctctgcgttatccgcagaaaactacgaaagcatgcgttacagcctgctggcagggcgaagcgtgttcgtccggttctgtgtattgccgatgaaactggtaggtgacgatgatct

gccgtgtatcgacaacgacgatctgcgtcgcggtaaaccgactaaccacaaaatfttcggtgaggataaccgagtgactgc  
tggaacgcactgcactcttacgccttcgagcatatcgcggttctacttctaaaaccgttggtgctgaccgcacctgcgat  
ggtgtccgagctgggtcgtgctactggctctgaaggtgtatgggtggtcagatggtagacatcgcacccgaaggcgcac  
gtctatcgacctgcagacctggaatggattcacatccacaaaaccgcaatgctgctggaatgctccgttgttgcgggtgca  
atcattggcgggtgccagcgaatcgtaatcgaacgtcccgtcgtacgcccgtgtgttggctgctgttccaggtagttga  
tgacattctggacgtaactaaaagcagcgcgacgaactgggtaagactcgggcaaggacctgatctctgataaagccacct  
accacaaagctgatgggtctggaaaaggccaaggagtctccgatgaactgctgaaccgtcgaagggtgaactgtcctgc  
ttcgaccagftaaagccgctccgctgctgggctggcagactacgtggcatttcgcaagaattaaggacttftaagaagga  
gatatacatgctcgcagtggttaattacaaccgtcacgttgggatgtgaatfttatccaatccctgctgagcgattacaaga  
ggacaaacacgtcattcgggcaagcgaactggttacactggftaaatggaactggaaaaagaaacagaccaaattgcc  
aattagagctgattgacgacttacagcgcgatggggtgagcgcacacttccagaatgagttcaagagattctgtcatctatc  
atctggaccaccattactataaaaaccctttccgaaagaggaacgtgatctgtatagcacaagcctggccttccggtactgc  
gtgagcatggctccaagtagcacaagaggtattcgtatgctcaagaatgaagagggcgagttcaagaatcactgtccg  
atgatactggtgcttattacaactgatgaagcgcagcttctgctgaccgagggggagacgactctggaaagcgcacggg  
aatttgcgaccaaattctagaagagaaagtaaatgaagcggcgtagatggcgatctgttaaccgcacgcgattctctg  
gacattccgttacactggcgtattaaacggccaaacgcgcccgtgtggattgagtggtatcgaaacgtccagacatgaac  
ccggtggtgctggaattgcaatfttagacttaaacatcgtgcaggtcaattcaggaagaactgaaagaatctttcgtgg  
tggcgaacaccggcttctgtgaaaaattaccgttgcgcgcgacgctggttgaatgftatttctggaataaccggcattatc  
gaaccgcgccagcagcgcgagcgccttattgatgggtaaggtcaatgcgctgattactgtcattgacgatattacgatg  
tatacggcactctggaagaactggagcagttacagatftaatccgcccgtgggacatcaatagcaccagctgccag  
attacatgcagctgtgttctggcgtgaataacttgtggacgacacctcttatgacgcatgaaagaaaaaggcgtgaatg  
ttatccctatctgcgtcagagttgggtggatctggccgataaataatggttaggcacgctggttctacgggtgggcacaaa  
ccgagttagaagaatatctggagaactcatggcagagtatcagtgggccatgcatgctgacgcacatcttcttcgctc  
ggattcattaccaaggagacggctgattccttataataatccatgacctgggtcgttggctatcttctcctcggctggc  
gacgatctgggtacgtctgtggaagaggtgtctcgtggggtggtccgaaatccttacagtgtacatgtccgattataacgc  
aagtgaagctgaagctcgaacatgtgaagtggctgatcggcaagtgtggaagaagatgaacgctgaacgtgttcca  
aggatagtccgttggtaaggatttattggttgcgccgttgcctggtcgtatggcccagctgatgtacataacggtgatg  
gtcatgggaccagcatcctattatcatcagcagatgacgcgtaccctgttgcaccttccgctaaggatccaaactcagat  
aaggatctccaggcatcaataaacgaaaggctcagtcgaaagactgggcttctgttctctcctcggctggc  
ctctctactagatcactggctcacttccgggtgggcttctgcgttatacctagggatattccgcttctcgcctactg  
actcgtacgctcgttctgactcggcgagcggaaatggcttacgaacggggcggagatttctggaagatgccag  
gaagatacttaacagggaagtgagagggccgcggcaaaagcgttctccataggctccgccccctgacaagcaccacga  
aatctgacgctcaaatcagtggtggcgaaaccgacaggactataagataaccaggcgttccccctggcggtccctcgt  
gcgctcctctgttctgcttccggttaccggtgtcattccgctgtatggccgcttctcattccacgctgacactcagtt  
ccgggtaggcagttcgtccaagctggactgtatgcacgaacccccgttcagtcgaccgctgcgccttaccggtact  
atcgtcttgagccaaccggaaagacatgcaaaagcaccactggcagcagccactggtaattgatttagaggagttagtct  
tgaagtcatgcgccggttaaggctaaactgaaaggacaagtttgggtactgcgctcctcaagccagttacctcgggtcaa  
agagttggtagctcagagaaccttcgaaaaaccgcctgcaagcgggttttctgtttcagagcaagagattacgcgcaga  
ccaaaacgatcgaagaatcatttataatcagataaaatatttctagattcagtgcaatttatcttcaaatgtacacct  
gaagtcagccccatagatataagttgtaactgcttggatttcaccaataaaaaacgcccggcggaaccgagcgttc  
tgaacaaatccagatggagtctgaggtcattactggatctatcaacaggagtcgaagcgcgctgtaaaactggctgaca  
gttaccatgcttaacagtgaggcacctatctcagcgcgatctgtctatttctcattccatagttgctgactccccgtcgtgtag  
ataactacgatacgggagggcttaccatctggccccagtgctgcaatgataccgcgagaccacgctcaccggctccaga  
ttatcagcaataaaccagccagccggaagggccgagcgcagaagtgtcctgcaactttatccgctccatccagcttatt

aattgtgccgggaagctagagtaagtagttgccagttaatagttgcgcaacgttgccattgctacaggcatcgtggtg  
tcacgctcgtcgtttggtatggcttcattcagctccggttccaacgatcaaggcgagttacatgatccccatggttgcaaa  
aaagcggtagctccttcggtcctccgatcgtgtcagaagtaagttggccgagtggtatcactcatggttatggcagcactg  
cataattcttactgtcatgccatccgtaagatgctttctgtgactggtgagtactcaaccaagtcattctgagaatagtgtatg  
cggcgaccgagttgctcttgcccggcgtcaatacgggataataccgcccacatagcagaactttaaagtgtcatcattg  
gaaaacgttcttcggggcgaaaactctcaaggatcttaccgctgttgagatccagttc gatgtaaccactcgtgcacccaa  
ctgatctcagcatctttacttaccagcgttctgggtgagcaaaaacaggaaggcaaaatgccgcaaaaagggaata  
aggcgacacggaaatgtgaatactcatactcttctttcaatattattgaagcatttatcagggtattgtctcatgagcgg  
atacatattgaatgtatttagaaaaataaacaataaggggtccgcgcacatttccccgaaaagtgccacct

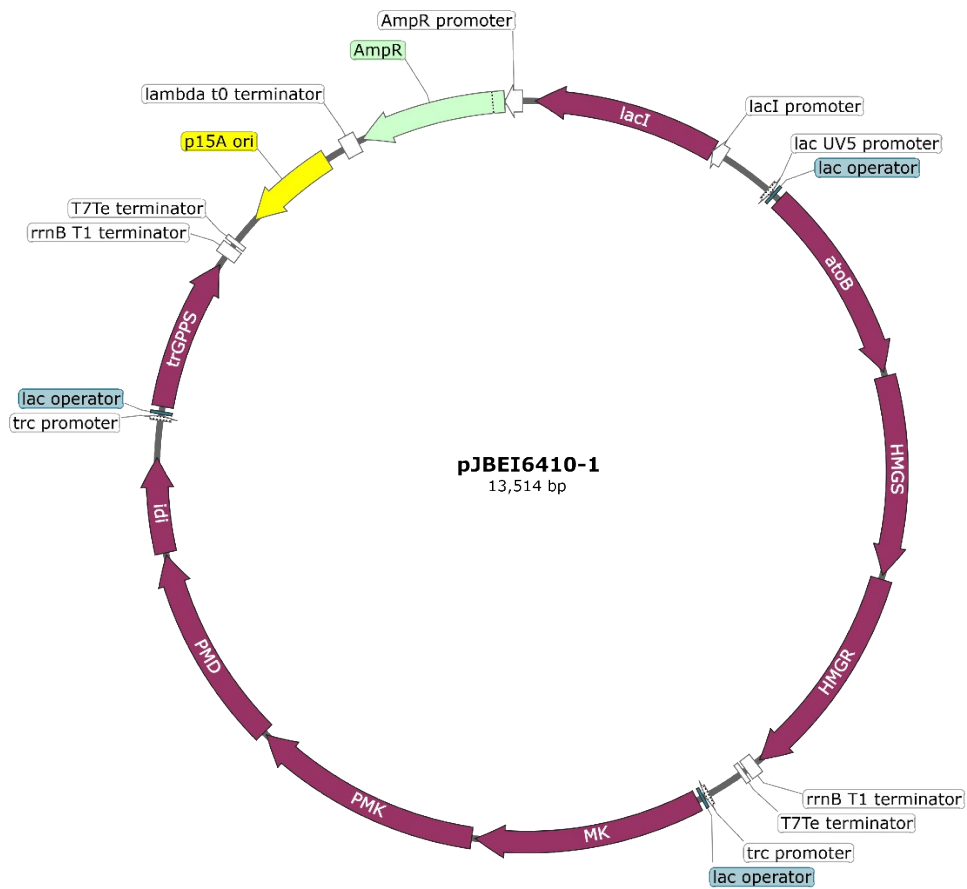

Fig. S2 The structure illustration of plasmid pJBEI6410-1. In this plasmid, limonene synthase gene was deleted for GPP supplementation.

Plasmid sequence of pJBEI6410-1:

gacgtcgggcctaataagtagtgaacttaacattaattgcgttgcgctcactgcccgtttccagtcgggaaacctgtcgtg  
ccagctgcattaatgaatcgccaacgcgcggggagagggcgtttgcgtattggggcccaggggtgttttctttaccag  
tgagacgggcaacagctgattgcccttcaccgctggccctgagagagttgcagcaagcggccacgctggttgccca  
gcaggcgaaaatcctgtttgatggtggttaacggcgggataacatgagctgtcttccggtatcgtctatcccactaccgag  
atgtccgcaccaacgcgcagcccggactcggtaatggcgcgcattgcccagcgcctatctgatcgttggaaccagcat  
cgcagtgggaaacgatgccctcattcagcatttgcattggtttgtgaaaaccggacatggcactccagtcgcctcccgttccg  
ctatcggctgaatttgattgcgagtgagatattatgccagccagccagacgcagacgcgcccagacagaactaatgggc  
ccgtaacagcgcgattgctggtgacccaatgcgaccagatgctccacgcccagtcgcgtaccgtcttcatgggagaaa  
ataatactgttgatgggtgtctggtcagagacatcaagaataacgccggaacattagtgcaggcagcttccacagcaatg  
gcatcctggtcatccagcggatagtaatgatcagcccactgacgcgttgcgcgagaagattgtgaccgcccgtttacag  
gcttcgacgccgcttcttaccatcgacaccaccagctggcaccagttgatcggcgcgagatttaacgccgcgaca  
atftgcgacggcgcgtgcagggccagactggaggtggcaacgccaatcagcaacgactgtttgcccgccagttgtgtgc  
cacgcggttgggaatgtaattcagctccgccatcggcgttccacttttcccgcgttttcgcagaaacgtggctggcctggtt  
caccacgcgggaaacggtctgataagagacaccggcatacttgcgacatcgtataacgttactggttccacattcaccacc  
ctgaattgactcttcccggcgctatcatgccataccgcgaaaggttttgcgccattcagtggtgtccgggatctcgacgct  
ctcccttatgcgactcctgcattaggaagcagcccagtagtaggttgaggccgttgagcaccgcccgcgcaaggaatggt  
gcatgcaaggagatggcggccaacagtcccccggccacggggcctgccaccatacccacgccgaaacaagcgtcat  
gagcccgaagtggcgagcccgatcttcccacgcgtgatgtcggcgatataggcgccagcaaccgcacctgtggcgccc  
gtgatgccggccacgatcgtccggcgtagaggatcagatcgtttaggcaccacccaggctttacactttatgcttccggctc  
gtataatgtgtggaattgtgagcggataacaattcagaattcaaaagatcttaggaggaatataaaatgaaaaattgtcat  
cgtcagtgcggtagctactgctatcggtagtttaacggttcactcgttccaccagcgcctatcgacctggggggcgacagta  
atfaagccgccattgaactgcaaaaatcgattcacaacacgttgatgaagtgattatgggtaacgtgttacaagccgggc  
tggggcaaaatccggcgcgtcaggcactgttaaaaagcgggctggcagaaacgggtgtcggattcacggtcaataaagt  
atgtgggtccgggtcttaaaagtgtggcgttcccggccagggcattcaggcaggtcagcgcagagcattgtggcggggg  
gtatggaaaatagatttagccccctacttactgatgcaaaagcagcctctggttatcgtcttgagacggacaggtttatg  
acgtaatcctgcgcgatggcctgatgtgcgccaccatggtatcatatggggattaccgccgaaaacgtggctaaagagt  
acggaattaccctgaaatgcaggatgaactggcgtacattcacagcgtaaagcggcagccgcaattgagtcgggtgctt  
ttacagccgaaatcgtcccggtaaatgttgcactcgaagaaaaacctcgtcttcagtcaagacgagttcccgaaagcgaa  
ctcaacggctgaagcgttaggtgcattgcgccggccttcgataaagcaggaacagtcaccgctgggaacgcgtctgta  
ttaacgacgggtgctgccgctctggtgattatggaagaatcgcggcgtggcagcagggccttacccttggctcgcaataa  
aagtattgccagcgggtggcgtgccccccgattgatgggtatggggccagctacctgccacgcaaaaagcgttacaactgg  
cggggctgcaactggcggatattgatctcattgaggtaatgaagcatttgcacagttccttggcgttgggaaaaacctg  
ggctttgattctgagaaagtgaatgtcaacggcggggccatcgcgctcgggcatcctatcggtgccagtggtgctcgtattc  
tggtcacactattacatgcatcagggcacgcgataaaacgctggggctggcaaacactgtgcattggcggcggtcagggga  
attgcgatggtgattgaacgggtgaattgaggatcttgaattaaggaggacagctaaatgacaataggtatcgataaataaa  
cttttacgttcaaaagtactatgtagacatggctaaattagcagaagcacgccaagtagaccaaaacaatttttaattggaatt  
ggtcaaacgaaatggctgttagctctgtaaccaagacatcgtttcaatggggcgtaacgctgctaaggacattataacaga  
cgaagacaaaaagaaaattggtatgtaattgtggcaactgaatcagcagttgatgctgctaaagcagccgctgttcaaat  
cacaacttattaggtattcaacctttgcacgctgcttgaatgaaagaagctgtttatgctgcaacaccagcaattcaattag  
ctaaagattattagcaactagaccgaatgaaaaagtattgattgtctacagatacagcacgttatggattgaactcagggc  
gcgagccaacacaaggtgctggcgcagttgcgatggttattgcacataatccaagcattttggcattaaatgaagatgctgtt  
gcttacactgaagacgtttatgatttctggcgtccaactggacataaataatcattagttgatggtgcattatcaaatgcttat

atccgctcattccaacaaagctggaatgaatacgcacaaacgcaaggttaagtcgctagctgacttcgcatctctatgcttcca  
tgftccatttacaacaaagggtaaaaggcattagagtcattcattgataacgctgatgaaacaactcaagagcgtttacgttc  
aggatgatgaagatgctgtagattataaccggtatgctggtaataatttatactggatcattatattaagcctaatacattactgaa  
aatcgagatttacaagctgggtaaaccaatcggttattcagttatggctcaggttcagttgggaattttatagtcgacattagt  
tgaaggctacaaagatcatttagatcaagctgcacataaagcattattaataaccgactgaagtatctgttgatgcatatgaa  
acattcttcaaacgctttgatgacgttgaatttgacgaagaacaagatgctgttcatgaagatcgtcatatcttctacttatacaat  
attgaaaataacgttcgcaataatcacagaccagagtaattaggatctattcaggaaacagaccatgtccatgcaaagtttag  
ataagaatttcgacatttatctgtaaagaaaagttacaacaattgggtgataagcaatggttatcagaagaacaattcgacat  
ttactgaaatcatccattaatcgcgatgaaagaagtagccaatagtttaattgaaaatgcatcgcgcaaggtgcattaccggttggg  
ttattaccgaataatcattgtggacgataaggcatatggtgtacatgatgggtggaagagccttcagttgtcgtcagctagtt  
atgggtgcaaagctagtgaatcagactggcggatttaaacggatcttctgaaactattatgataggcaaacgcttcttctgatg  
gctgtgacgatactgaaaattatcagcagacattaaagctttgaaaagcaaatcataaaattgaggatgaggcatatcctt  
ctattaaagcgcgtgggtgggttaccacgtatagcattgatacattcctgagcaacagttactatctttaaagatttgggt  
gatacgaagatgctatggcgctaatatgcttaatacgttttagaggccataactgcatttttaaaaaatgaatttcgcaaa  
gagcattttaaagtagtattttatccaatcatgcaacagcgtccgtttaaagttcaaggcgaattgatgtaaagatttagca  
aggggagagagaactggagaagaggtgccaacgaatggaacgtgcttctgtattggcccaagtagatattcatcgtgca  
gcaacacataataaaggtgtatgaatggcatacatgctgttgggttagcaaacaggaaatgatacgcgtgggtgcagaagcaa  
gtgcgcatgcatacgcgagctgacggacagatcgtggattgctacatggcgttacgatcaagatcgtcaacgattgatt  
ggtaaatgaaagtcctatgacattggcaatcgttggcgggtgacaaaagtattaccaattgctaaagcttcattagagcta  
ctaatgtagagtcagcacaagaattaggatcgtgtagttgctgccgttgggttagcgcacaaactttgcagcatgctcgcgcgtt  
gtgacagaaggtattcaacaaggtcatatgagtttacaataataatcattagctatcgtttaggggcaaaaaggtgatgaaatt  
gctaaagtagctgaagctttgaaaaagaacccgctgcaatacacaaagcagcggcaacataatttacaagaatttagacaa  
caataaggatcttttaaggatctccaggcatcaataaaaacgaaaggtcagtcgaaagactgggccttctgcttctctgtt  
ttgtcggtaacgctctactagagtcacactggctcacttcgggtgggccttctcgtttatagcgaattgatctggtt  
acagcttatcactgactgcacgggtgcaccaatgcttctggcgtcaggcagccatcggaaagctgtggtatggctgtgcaggt  
cgtaaatcactgcataaactgctgctcaaggcgcactcccgttctggataatgtttttgcgccacatcataacggttctgg  
caaatattctgaaatgagctgttgacaattaatcaccggctcgtataatgtgtggaattgtgagcggataacaatttcaggatc  
taggaggaaataaccatgctctgctcactgacgtctgcgccaggttaaggtgatcctctcggcgagcactctgcggtg  
acaataagccggcgtcgcgcctctgtgctgcttacgcactacctgctgatcagcgaatcttctgcaccggacacgat  
cgagctggacttccggacatcagcttcaaccacaagtgagcatcaacgactcaacgcgatcacggaggaccaggtga  
acagccaaaagctggccaaagcccagcaagcaaccgaggtctgctcaggagctgggtctctgctgacccgctgtta  
gagcagttaaagcagagcttcattaccacgccgcttctgcttctgtacatgttcgttgcctgtgccgcacgcaagaa  
catcaagttcagcctgaagagcagcgtgccgattggcgcaggcttaggctctagcgcacatctatcagcgtgagcctggcgt  
ggcgtatggcctatctgggtggcctgattggcagcaacgactggagaaactgagcgaacgacaagcagcagcgtgac  
cagtgggccttctcggcgagaagtcattcatggcaccggagcggcattgacaacgcagttgccacgtatggcaacgc  
cctgctgttcgagaaagacagccacaacggcagcagatcaacacgaacaactcaagttcctggacgacttcccggcgtacc  
cgatgattctgactacaccgctatcccacgcagcacaaggttagctgcccgcgtgctgttttagtcaccgaaaagttc  
ccggaggtgatgaagccgatcctggacgcgatggcgagtgccgctgaggggtctggagatcatgaccaagctgagc  
aagtcaagggcaccgacgatgaggcgggtggagaccaaatgagctgtacgagcagctgctggagctgatccgtatca  
atcagggcctgctggtctctatcgggtgtctcaccgggctggaactgatcaaaaacctgagcagcagcactgcgctt  
gctctacgaaattaacgggtgcaggtggcgggtgctctttaaactgctgctgcgccgtgacattacgcaggagcaaatcg  
acagctcaagaagaagctgcaggacgactcagctacgagacgttcgagacggacctggcggcagggcgtgtgct  
gctgagcgcacaaaatctgaacaaggacctgaagatcaaaagcctggtgttccagctgttcgaaaacaagcagccacga  
agcagcagatcagcagcctgttactccgggtaacaccaatctgccgtggacgtcttaaggatctaggaggagatcatat

gagcgaattacgtgcattcagcgcgccaggttaaggcactgctggccggtggctacctggtgftagacaccaagtacgagg  
cgttcgctcgtggcttatctgcccgtatgcatgcagttgccaccctgatgtagcctgcagggctctgacaagttcgaagt  
cgtgtgaagagcaagcagttcaaggacggcgagtggctgtaccacattagcccaagagcggcttcatcccgttagcat  
tgggtggcagcaagaaccatttatcgagaaggtcattgccaacgtttcagctactcaagccgaatatggacgattactgca  
accgcaacctgttcgcatcgacatttcagcgacgacgcgtaccacagccaagaggactctgttacggagcatcgtggt  
accgccgctgagcttccacagccatcgattgaggaggtgccgaagacgggtctgggttctagcggcgttagttaccg  
tctaacgacggcgtagcagcttctcgtgagcgacctggagaacaacgtggacaagtaccggaagtattcataacc  
tggcgcaggtggcacattgtcaggcccaagtaagattggctctggtttgatgtggcagcggccgcctatggctctatccg  
ctatgccgctttccggccctgatcagcaatcgcggacatcggctctgcgacgtatggtagcaaacctggcgcact  
gggtggcaggaagaagactggaacatcaccattaagtctaatacctgccgagcggcttaacgttatggatgggcgatata  
gaacggcagcgaaacggttaagctggtgcagaaagtgaaaaactggtacgacagccacatgccggaaagcctgaagatt  
tacacggagctggaccacgccaatagccgtttcatggatggtctgagcaagctggaccgctgcacgaaaccacgacg  
actacagcgaccaaatctcagagcctggagcgaatgactgcacctgccagaagtaccggagatcacggaggtccg  
cgatgccgtggcaacgattcgcctagcttccgaaaattacgaaggagagcggcgggatatacgaaccaccggtccag  
acgtctctgctggacgactgtcaaacctaaaggcgtgtaacgtgcctgattccggcgcgggtggttacgacgccattg  
ccgtcatcacgaaacaggacgtcgatctgcgcgcaaaaacggccaacgacaaaacgtttcagcaaatgccaatggctggat  
gttacgcaggccgactggggtgtcgaaggagaaggaccggaaacgtatctggataagtgaggatctaggaggattat  
gagatgaccgtttacacagcatccgttaccgcaccctcaacatcgcaacccttaagtattgggggaaaaggacacgaa  
gttgaatctgccaccaatctcctatcagtgactttatcgcaagatgacctcagaacgttgacctctcggctactgcacc  
tgagttgaacgcgacactttgtggttaaatggagaaccacagcatcgcaaatgaaagaactcaaaatgtctgcgcgac  
ctacgccaattaagaaaggaaatggaatcgaaggacgcctcattgccacattatctcaatgaaactccacattgtctccg  
aaaataactttctacagcagctggtttagcttctccgctgctggctttgctgattggtctctgcaattgctaagtataccaat  
taccacagtcaactcagaaatatacagaatagcaagaaagggtctggttcagctttagatcgtttggcggatcgtg  
gcctgggaaatgggaaaagctgaagatggtcatgattccatggcagtaacaatcgacagacgtctgactggcctcagat  
gaaagcttgtcctagttgtcagcgatataaaaaggatgtgagttccactcagggtatgcaattgaccgtggcaacctccg  
aactattaaagaaagaattgaacatgtcgtacaaagagattgaaatcagcgtaaagccattgtgaaaaagattcggca  
cctttgcaaggaacaatgatggattcaactttccatgccacatgtttggactttccctcaatattctacatgaatgac  
actccaagcgtatcatcagttggtgccacaccattaatcagttttacggagaacaatcgttcatacacgtttgatgcaggt  
ccaaatgctgtgttactacttagctgaaaatgagtcgaaactctttgcatttatctataaattgtttggctctgttctggatgg  
gacaagaaattactactgagcagcttgaggctttcaaccatcaattgaaatcatcaactttactgcacgtgaattggatcttga  
gttgcaaaaaggatgttgcagagtgattttaactcaagtcggttcaggcccacaagaacaacgaatctttgattgacgcaa  
agactggtctacaaaaggaataaggatctaggaggtaatgataatgcaaacggaacacgtcattttattgaaatgcacaggga  
gtcccacgggtacgctggaaaagtatgccgcacacacggcagacaccgcttaccatctcgcgttctccagttggctgttta  
atgccaaaggacaattattagttaccgccgcgactgagcaaaaaagcatggcctggcgtgtggactaacctgggtttgtg  
ggcaccacaactgggagaaagcaacgaagacgcagtgatccgccgttgccttatgagcttggcgtggaattacgcct  
cctgaatctatctatctgactttcgtaccgccaccgatccgagtggtcattgtgaaaaatgaagtgtgtccggtatgtcc  
gcacgcaccactagtgcgttacagatcaatgatgatgaagtgatggattatcaatggtgtgatttagcagatgtattacaggt  
attgatgccacgccgtggcgttcagctccgtggatggtgatgcaggcgacaaatcgcaagccagaaaacgattatctgc  
atttaccagcttaataaggatctcgcaaaaaacccgcttcggcggggtttttccgactgcacggtgcaccaatgctt  
ctggcgtcaggcagccatcggaagctgtggtatggctgtgcaggtcgtaaatcactgcataaattcgtgtcgtcaagggc  
actcccgttctggataatgtttttgcgccacataacggttctggcaaatattctgaaatgagctgttgacaattaatc  
cggctctataatgtgtgaattgtgagcggataacaattcaggatcttttaagaaggagatatacatggaattgacttaac  
aaatacatggactccaaagcgtatgacggtaaatgaagcactgaacaaagcgtatccctctgcgttatccgcagaaaaatctac  
gaaagcatgcgttacagcctgctggcagcggcaagcgtgttcgctccggttctgtgtattgccgatgtgaactggttaggtg



gtaccgaagaactggcgatcccaccgctgcgcaattgaaatgatccacacgatgtccctgatgcacgatgatctgccgt  
gtatcgacaacgacgatctgcgtcgcgtaaacgactaaccacaaaatttcggtgaggataccgacgtgactgctggta  
acgcactgcactcttagccttcgagcatatcgcggttctacttctaaaaccggttggtgctgaccgcatctgcgatgggt  
ccgagctgggtcgtgctactggctctgaaggtgttatgggtggctagatggtagacatcgcacccgaaggcgatccgctat  
cgacctgcagacctggaatggattcacatccacaaaaccgcaatgctgctggaatgctccggttctgctgcaatcatt  
ggcggtgccagcgaaatcgtaatcgaacgtccccgtcgtacgccgctgtgttgctgctgttccaggtagttgatgaca  
ttctggacgtaactaaaagcagcgcgaactgggtaagactcgggcaaggacctgatctctgataaagccacctacca  
aagctgatgggtctggaaaaggccaaggagtctccgatgaactgctgaaccgtgcgaagggtgaactgtcctgctcgcac  
ccagttaaagccgctccgctgctggcctggcagactacgtggcattctcagaattaaggatcttttaagaaggagatata  
cggatccaaactcgagtaaggatctccaggcatcaataaaacgaaaggctcagtcgaaagactgggccttctgtttatct  
gtgttctcgtgtaacgctctctactagagtcacactggctcacctcgggtggccttctcgtttatacctagggatatt  
ccgcttctcgtcactgactcgtcactcgtcgtcgtcgtcgtcgtcgtcgtcgtcgtcgtcgtcgtcgtcgtcgtcgtc  
tctggaagatgccaggaagataactaacagggagtgagagggccgcgcaagccgttttccataggctccgcccc  
ctgacaagcatcacgaaatcgactcaaatcagtggtggcgaaaccgacaggactataagataaccaggcgttccc  
cctggcggctcctcgtcgtcctcgtcgtccttccggttaccggtcattccgctgttatggcgcgttctcattc  
cacgctgacactcagttccgggtagcagttcgtccaagctggactgtatgcacgaacccccgttcagtcggaccgct  
gcgcttatccgtaactatcgtcttgatccaaccggaaagacatgcaaaagcaccactggcagcagccactggttaatt  
gatttagaggagttagcttgaagtcagcgcgggtaaggctaaactgaaaggacaagtttgggtgactgcgctcctcaag  
ccagttacctcggttcaaagagttggtagctcagagaacctcgaaaaaccgacctgcaaggcggttttctgtttcagagc  
aagagattacgcgcagacaaaacgatctcaagaagatcatcttataatcagataaaatattctagatttcagtgcaattat  
ctctcaaatgtagacctgaagtcagccccatacagataaagttgttactagtgcttgattctaccaataaaaaaacgccg  
gcggcaaccgagcgttctgaacaaatccagatggagttctgaggtcattactggatctatcaacaggagtccaagcgagct  
cgtaaaacttggtctgacagttaccaatgcttaatcagtgaggcacctatctcagcagatctgtctattctgttcatcatagttgcc  
tgactccccgtcgtgtagataactacgatacgggagggcttaccatctgccccagtgctgcaatgataaccgagacca  
cgctcaccggctccagattatcagcaataaacagccagccggaaggccgagcgcagaagtgtcctgcaacttate  
cgctccatccagcttattaattgttccgggaagctagagtaagtagttcggcagttatagtttgcgcaacggttggcatt  
gctacaggcatcgtggtgcacgctcgtcgttggatggctcattcagctccggtccaacgatcaaggcgagttacatg  
atccccatggttgcaaaaaagcggtagctcctcggctcctccgatcgtgtcagaagtaagttggccgagtgatcact  
cattctgagaatagtgtatcggcgaccgagttgctcttccccggcgtcaatacgggataataccgcccacatagcagaa  
ctttaaagtgctcattggaaaacgttctcggggcgaaaactctcaaggatctaccgctgttgagatccagttcagtg  
aaccactcgtgcaccaactgatctcagcatctttacttaccagcgttctgggtgagcaaaaacaggaaggcaaat  
gccgcaaaaaagggaataaggcgacacggaaatgttgaatactcactcttctttcaatattattgaagcattatcag  
ggttattgtctatgagcggatacatattgaaatgtattgaaaaataaacaataggggtccgcgcacattccccgaaaa  
gtgccacct

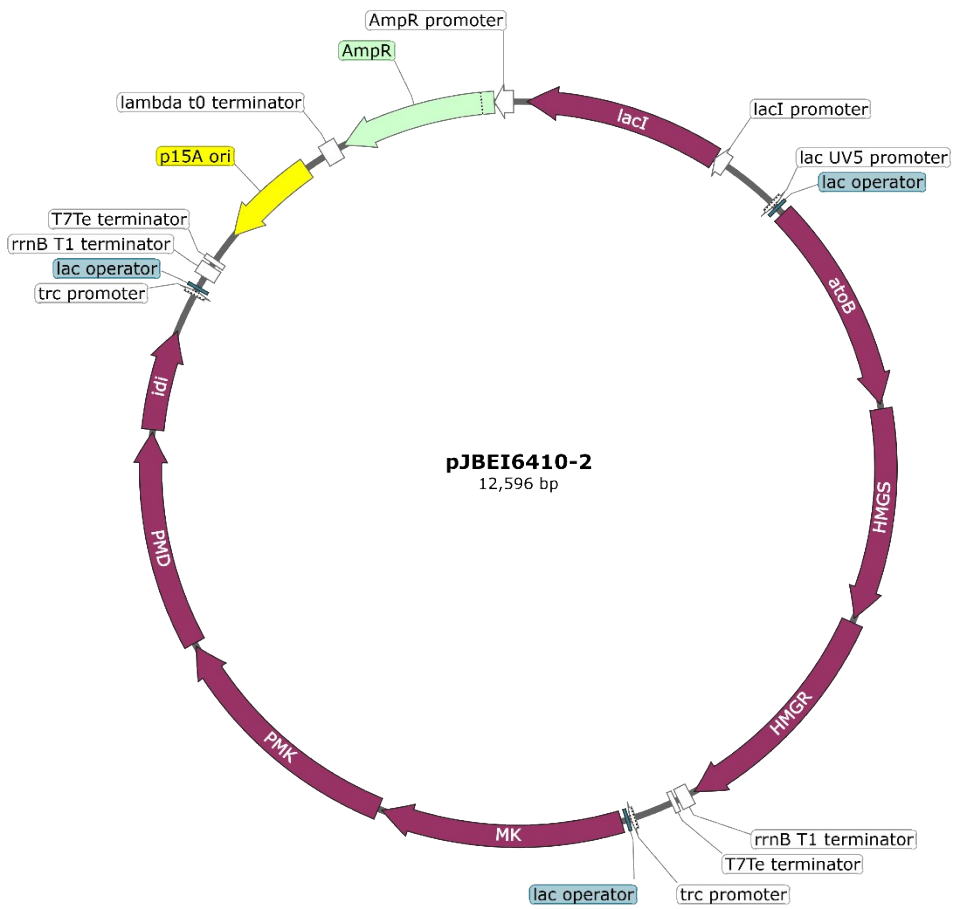

Fig. S3 The structure illustration of plasmid pJBEI6410-2. In this plasmid, the geranyl pyrophosphate synthase gene was further deleted for DMAPP supplementation.

Plasmid sequence of pJBEI6410-2:

gacgtcgggtcctaataatgagtagtaacttacattaatgcgttgctcactgcccgtttccagtcgggaaacctgtcgtgccagctgcatta  
atgaatcggccaacgcgcggggagaggcggtttgctattggcgccagggtggtttttccaccagtacgggcaacagctgattgc  
ccttcaccgctggccctgagagagttgcagcaagcggtccacgctggttggcccagcaggcgaatacctgtttgatggtggttaacggc  
gggataaacatgagctgtctcggatcgtcgtatccactaccgagatgtccgcaccaacgcgcagcccggactcggtaatggcgcgcat  
gcccagcgcctatctgatcgttggcaaccagcatcgcagtgggaaacagatgccctcattcagcatttgcattggttggaaaaccggacatg  
gcactccagtcgcttccgttccgctatcggctgaattgattgcgagtgagatattatgccagccagccagacgcagacgcgccgagaca  
gaactaatgggcccgtaacagcgcgattgctggtgacccaatgcgaccagatgtccacgcccagtcgcgtaccgtcttcatgggagaa  
aataatactgttgatgggtgctggtcagagacatcaagaataacgccggaacattagtcagggcagcttccacagcaatggcactcgtgc  
atccagcggatgtaataatgacagccactgacgcgtgctgcgagaaagattgtcaccgcccgtttacaggcttcagcggcctcgttctacc  
atcgacaccaccagctggcaccagttgatcggcgcgagatftaatgccgcgacaattgagcggcgcgctgcagggccagactggag  
gtggcaacgcaatcagcaacgactgtttcccgcagttggtgccacgcggttgggaatgtaattcagctccgccatcggcgttccacttt  
tcccgcgtttcagaaaacgtggctggcctggtcaccacgcgggaaacggctgataagagacaccggcactactcgcgacatcgtataa  
cgttactggtttcacttaccacccctgaattgactcttccggcgcgtatcatgccataccgcgaaagggttttgcgccattcagtggttccgg  
gatctcagcgtctcctttagcactcctgcattaggaagcagcccagtagtaggtgaggccgttgagcaccgccgcgcaaggaatgt  
gcatgcaaggagatggcggcccaacagtcccccggccacggggcctgccaccatacccacgccgaaacaagcgtcatgagcccgaagt  
ggcgagcccgatctccccatcggatgctggcgatataaggcggcagcaaccgacctgtggcggcggatgcccggccacgatgcgtc  
cggcgtagaggatcagatcgttaggcaccccaggctttactttatgcttccggctcgtataatgttgaattgtgagcggataacaattc  
agaattcaaaagatcttaggaggaatataaaatgaaaatgtgtcatcgtcagtgccgtactgctatcggtagtttaacggttcactcgt  
tccaccagcgcctacgactggggggcagacgaatgaaagccgcatggaacgtgcaaaaatcattcacaacacgttgatgaagtattatg  
ggtaacgtgttacaagccgggctggggcaaaatccggcgcgtcaggcactgttaaaaagcgggctggcagaaaacgggtgctggattcacg  
gtcaataaagtatgtgttcgggtcttaaaagtgtggcgttcccggccagccattcaggcaggtcagggcagagcattgtggcgggggg  
tatggaaaatagatttagcccccacttactcgtatgcaaaagcagcgtctggttatcgttggagacggacaggtttatgacgtaactcgtc  
cgatggcctgatgtgcgccaccatggttatcatatggggattaccggcgaaaacgtggctaaagagtacggaattaccggtgaaatgcagg  
atgaactggcgtacattcacagcgtaaagcggcagccgcaattgagtcgggtgctttacagccgaaatcgtcccggtaaatgttgcactc  
aaagaaaacctgtcttcaagcagagttcccgaagcgaactcaacggctgaagcgttaggtgattgcccggccttcgataaag  
caggaacagtcaccgctgggaacgcgtctggtattaacgacggtgctcggcctggtgattatggaagaatctcggcgtggcagcagg  
ccttacccccctggctcgcattaaaagtattgccagcgggtggcgtgccccccgattgatgggtatggggccagctaccacgcaaaaag  
cgttacaactggcggggctgcaactggcgatattgatctcattgaggctaatgaagcatttgcacagttccttgcggtgggaaaaacctg  
ggctttgattctgagaaagtgaatgcaacggcggggccatcgcgctcgggcatcctatcggtgccagtggtgctctattctggtcacactatt  
acatgccatgagggcagcgataaaacgctggggctggcaactgtgattggcggcgggtcaggaattgcgatggtgattgaacgggtg  
aattgagatctgaattaaggagagcagctaaatgacaatggtatcagataaaataaactttacgttccaaagtactatgtagacatgctaaa  
ttagcagaagcagccaagtagaccaaaacaaattttaattggaattggtcaaacgaaatggctgttagctgtaaaccaagacatcgtttca  
atgggcgtaacgctgtaaggacattataacagacgaagacaaaaagaaatggtatggaattgtggcaactgaatcagcagttgatgct  
gctaaagcagccgctgttcaattcacaactattaggtattcaacctttgcacgctgcttgaatgaaagaagctgttatgctgaacaccag  
caattcaattagctaaagattatttagcaactagaccgaatgaaaaagtattagttattgctacagatacagcagttatggattgaactagggc  
gcgagccaacaaaggtgctggcgcagttgcgatggttattgcacataatccaagcattttggcattaaatgaagatgctgttgccttactgaa  
gacgtttatgatttctggcgtccaactggacataaaatccattagttgatggtgcattatctaaagatgcttatatccgctcattcaacaaagctg  
gaatgaatacgaacgtaaggttaagtcgctagctgactcgcactctatgcttccatgtccatttcaaaaaatgggtaaaaaggcattaga  
gtcaatcattgataacgctgatgaaacaactcaagagcgtttacgttcaggatgaaagatgctgtagattataaccgttatgctggtaaatattata  
ctggatcattatattaaagcctaataatcattactgaaaaatcagatttacaagctggtgaaacaatcggttattcagttatggctcaggttcagttg  
gtgaattttatagtcgacattagttgaaggctacaagatcatttagatcaagctgcacataaagcattattaataaccgtactgaagtatcgtt  
gatgcataatgaaaccttcaaacgtttgatgacgttgaatttgacgaagaacaagatgctgttcatgaagatcgtcatattttctacttataaat  
attgaaataacgttcgcaatcacagaccagagtaattagatctattcaggaaacagaccatgtccatgcaagtttagataagaattttc

acatttatctcgtaaagaaaagtacaacaattggttgataagcaatggtatcagaagaacaattcgacatttactgaatcatcattaatc gatg  
aagaagtagccaatagtttaattgaaaatgcatcgcgcgaaggtgcattaccggttgattattaccgaatatcattgtggacgataaggcatatg  
ttgacatgatggtggaagagccttcagttgctgctgcagctagttatggtgcaaagctagtgatcagactggcggattfaaacggatctt  
ctgaacgtattatgataggcaaatcgtctttgatggcgtgacgatactgaaaaattatcagcagacattaagccttagaaaagcaaatcataa  
aattgcggatgaggcatacttctattaaagcgcgtgggtggttaccacgtatagcgattgatacttctgagcaacagtactactcttta  
aaagtattgtgatacgaagatgctatggcgctaatatgcttaatacgatttttagaggccataactgcatttttaaaaaatgaatttccgcaaag  
cgacatttaagtagtattttatccaatcatgcaacagcgtccgtttaaagttcaaggcgaaattgatgtaaaagattgaagggggcgagag  
aactggagaagaggttgcacaacgaatggaacgtcttctgattggccaagtagatattcatcgtgcagcaacacataataaaggtgtatg  
aatggcatacatgctgtgttttagcaacaggaaatgatacgcgtggtgcagaagcaagtgccatgatacgcgagtcgtgacggacagat  
cgtggtattgctacatggcgttacgatcaagatcgaacgattgattggtacaattgaagtcctatgacattggcaatcgttggcgggtgtaca  
aaagtattaccaattgctaaagcttcaagagctactactaaatgtagtgacgacagaagaattaggtcatgtagttgctgctgggttttagcgcaa  
aactttgcagcatgctgcgcgctgtgtcagaaggtatcaacaaggtcatatgagttacaataataatcattagctatcgtttaggggcaaaa  
ggtgatgaaattgctaaagtagctgaagcttgaaaaaagaaccccgtaacatacacaagcagcggaaacatattttacaagaaattagacaa  
caataaggatcttttaaggatctccaggcatcaataaaaagaaaggtcagtcgaaagactggcctttctgttttctgtgtttgctggta  
cgctctactagagtcacactggctcaccttcgggtggcctttctgctttatagcgaattgatctggttgacagcttatcatcactgcacgg  
tgcaccaatgcttctggcgtcaggcagccatcggagctgtggtatggctgtgcaggtcgtaaatcactgcataattcgtgctcgaaggcgc  
actcccgttctgataatgtttttgcgccacataacggttctggcaaatattctgaaatgagctgttgacaattaatcatccggctcgtataat  
gtgtggaattgtgagcggataacaatttcaggatctaggaggaaataacctgtctctgccattcctgacgtctgcgccaggttaaggtgatcatc  
ttcggcgagcactctgcggtgfacaataagccggcctcgtcgcctctgtgctgcttacgcacctacctgctgatcaggaattcttctgcac  
cggacacgatcagctggactttccggacatcagctcaaccacaagtgagcatcaacgactcaacgcgatcacggaggaccaggtgaa  
cagccaaaagctggccaagccagcaagcaaccgacggtctgtctcaggagctggtgtctctgctggaccgctgttagcgcagttaaagc  
gagagctccattaccacgccgcttctgctcctgtacatgtctgttctgctgcccgcacgaaagaacatcaagttcagcctgaagagcac  
gctgccgattggcgcaggcttaggctctagcgcactatcagcgtgagcctggcgtgctggcgtatggcctatctgggtggcctgattggcagca  
acgacctggagaactgagcgaacgacaagcagatcgtgaaccagtgggcctttatcggcgagaagtgactcatggcaccggagcgc  
gcattgacaacgcagttgccacgtatggcaacgccctgctgttcgagaaagacagccacaacggcacgatcaacacgaacaactcaagttc  
ctggacgacttcccgggatcccgatgattctgacctacaccgfatcccacgcagcaccgaagatttagtcgcccgcgtgctgttttagtca  
ccgaaaagtcccggaggtgatgaagccgatcctggacgcgatgggcgagtgccgctgcagggctgagatcatgaccaagctgagca  
agtgaagggcaccgacgatgagcgggtggagaccaacaatgagctgtacgagcagctgctggagctgatccgtatcaatcacggcctgc  
tggctctatcgggtgtctcaccggcctggaactgatcaaaaactgagcagcactgctgctacgaaattaacgggtgacg  
gtggcgggtgctcttcaacgctgctgcgccgtgacattacgcaggagcaaatcagacgttcaagaagaagctgcaggacgacttcagc  
tacgagacgttcgagacggacctggcggcagggctgttgcctgctgagcgcacaaaatctgaacaaggacctgaagatcaaaaagcctg  
gtgtccagctgttcgaaaacaagacgaccagaagcagcagatcagcagcctgttactgccgggtaacaccaatctgccgtggacgtctta  
aggatctaggaggagatcatatgagcgaattacgtgacattcagcgcgccaggttaagcactgctggccggtgctacctggtttagacac  
caagtaggagcgttcgctgctgctgcttctgcccgtatgcatgagttgccaccctgatgtagcctgcagggctctgacaagttcgaagtg  
cgtgtgaagagcaagcagttcaaggacggcgagtggtgtaccacattagccaaagagcggcttcatccgggttagcattggtggcagca  
agaaccatttatcgagaaggtcattgccaacgtcttcaagccttcaagcgaatattggacgattactgcaaccgcaacctgttctcatcgcac  
atttcagcagcagcgtaccacagccaagaggactctgttacggagcatcgtgtaaccgccgctgagcttccacagccatcgcattga  
ggaggtgccgaagacgggtctgggttctagcgggttttagttaccgtcttaacgacggcgttagcagcttctctgtagcagcactggagaa  
caactggacaagtagccgaaagtgattcataacctggcgcaggtggcactgtcagggcaaggttaaggtgctctggtttgatgtggc  
agcggccgctatggtctatccgctatcggccttccgccggcctgatcgaatctgccggacatcggctctgcgacgtatggttagcaa  
actggcgcactggtggcgaagaagactggaacatcaccatlaagtctaatcacctgccgagcggcttaacgttatgtagggcgatatcaa  
gaacggcagcgaacggtaagctggtgcagaaagtgaaaaactgttacgacagccacatgccgaaagcctgaagatttacacggagct  
ggaccacgccaatagccgtttatggatggtctgagcaagctggaccgctgcacgaaccacgacgactacagcgacaaaatcttcgag  
agcctggagcgaatgactgcacctgccagaagtaccggagatcagggaggtccgcgatccgtggcaacgattcgcctgacttccgc

aaaattcgaaggagagcggcgcgatcgaaccaccggtccagacgtctctgctggacgactgtcaaaccttaaaggcggttaacgtg  
cctgattccggcgcggggtggttacgacgccattgccgtcatcacgaaacaggacgtcgtatctcgcgcacaaacggccaacgacaaacgt  
ttcagcaaagtccaatggctggatgttacgacggccgactgggggttcgcaaggagaaggacccggaaactatctggataagtgggat  
ctaggaggattatgagatgaccgtttacacagcatccgttaccgacccgtcaacatcgcaacccttaagtattgggggaaaaggacacga  
agttgaatctgccaccaattcgtccatatcagtgactttatcgcaagatgacctcagaacgttgacctctcgcgctactgcacctgagttgac  
gcgacactttgtggttaattggagaaccacagcatcgacaatgaaagaactcaaaattgtctcgcgacacctacgccaattaagaaaggaa  
atggaatcgaaggacgacctcattgccacattatctcaatggaactccacattgtctccgaaaataactttctacagcagctggtttagcttct  
ccgctgctggctttgctgcattggtctctgcaattgctaagttafaccaattaccacagtcaacttcagaatatctagaatagcaagaaagggt  
ctggtcagctgtgagatcgtgtttggcgatcgtggcctgggaaatgggaaaagctgaagatggtcatgattccatggcagtacaaatcgc  
agacagctctgactggcctcagatgaaagctgtgtcctagttgtcagcgtatataaaaaggatgtgagttccactcagggtatgcaattgacc  
tggaacctccgaactatftaaagaaagaattgaacatgctgtaccaaaagagattgaaatcatcgtaagccattgtgaaaaagatttcc  
accttgcgaaggaaacaatgatggattccaactttccatgccacatgtttggactttccctcaatattctacatgaatgacacttccaagcg  
tatcatcagttggtccacaccattaatcagttttacggagaaacaatcgtgcatacacgtttgatgcaggccaatcgtgtgttactacttag  
ctgaaaatgagtcgaaacttttgcattatctataaattgtttgctctgttctggatgggacaagaaattactactgagcagcttgaggcttca  
accatcaattgaaatcatctaactttactgcacgtgaattggatcttgagttgcaaaaggatgttccagagtgatttactcaagtcggttcaggc  
ccacaagaacaacgaatctttgattgacgcaagactggctctaccaaaaggaataaggatctaggaggtaatgataatgcaaacggaacac  
gtcattttattgaaatgcacaggaggttccacgggtacgctggaagatgcccgcacacaggcagacaccgcttacatctcgcgttctcca  
gttggctgttfaatgcaaaaggacaattatttagttaccgccgactgagcaaaaaagcatggcctggcggtgtggactaacggttgg  
gcaccacaactgggagaagcaacgaagacgcatgacccggttgcggttatgagcttggcgtgaaattacgcctcctgaaatctatcta  
tctgactttcgtaccgccaccgatccgagtgccattgtggaatgaaggtgtcgggtatfttccgcacgcaccactagtcggtacag  
atcaatgatgatgaagtgatggattatcaatggtgtgatttagcagatgtattacacgggtattgatccacgccgtggcggtcagtcggtgatg  
gtgatgcaggcgacaaatcgggaagccagaaaacgattatctgcattaccagcttaataaggatctcgcaaaaaacccgcttcggcggg  
ggtttttcggcactgcacgggtgaccaatgcttctggcgtcaggcagccatcggaagctgtggtatggctgtgaggtcgtaaatcactgca  
taattcgtgctcaaggcgactcccgttctggataatgtttttcggcgcacataacggcttctggcaaatattctgaaatgagctgttgac  
aattaatcatccggctctgataatgtgtggaattgtgagcggataacaattcaggatctttaagaaggagatatacggatccaaactcgagtaa  
ggatctccaggcatcaataaaaacgaaaggctcagtcgaaagactgggccttctgtttatctgtttgtcgggtgaaacgctctctactagatc  
aactggctcaccttgggtggccttctgctgttatactagggatatactccgcttctcgtcactgactcgtacgctcggtcgttcgactg  
cggcgagcggaaatggcttacgaacggggcgagatttctggaagatgccaggaagataactaacagggaagtgagagggccgcggca  
aagccgttttccataggtcggccccctgacaagcatcacgaaatcagctcaaatcagtggtggcgaaccggacaggtataaag  
ataccaggcgtttccccctggcggtccctcgtgcgctcctctgcttctgcttctgggttaccgggtcattccgctgttatggccggtttgtctc  
attccacgctgacactcagttccggtaggcagttcgtcctcaagctggactgtatgcagaacccccgttcagtcgaccgctgcgcttat  
ccgtaactatcgtctgagccaaccggaaagacatgcaaaagcaccactggcagcagccactggtaattgatttagaggagttagcttga  
agtcacgcccgttaaggctaaactgaaaggacaagtttgggtactcgcctcctcaagccagttacctcgggtcaaaagattggtagctca  
gagaacctcgaaaaaccgctcgaaggcgggttttctgtttcagagcaagagattacgcgcagacaaaacgatctcaagaagatcatctt  
attaatcagataaaatattttagattcagtgcaattatcttcaaatgtagcacctgaaagtcagccccatagataaagtgttactagtgttg  
gattctcacaataaaaaacggcgcgcaaccgagcgttctgaacaaatccagatggagttctgaggtcattactggatctatcaacagga  
gtccaagcgagctgtaaaactggtctgacagttaccaatgcttaacatcagtgaggccacatctcagcgatctgtctatttctcatcattatg  
cctgactccccgtctgttagataactacgatacgggagggcttaccatctggccccagtgctgcaatgataccgagaccacgctcaccg  
gtccagattatcagcaataaacagccagccgggaaggccgagcgcagaagtggtctgcaactttatccgctccatccagcttattaatt  
gttccgggaagctagagtaagtgtccagttaatgtttgcgcaacgttgttgcattgctacaggcatcgtggtgtcacgctcgtcgtt  
gtatggcttcaatcagctccggttccaacgatcaaggcagttacatgatccccatgttgcgcaaaaaagcgggttagctccttcgctcctccg  
atcgttgcagaagtaagtggccgagttatcactcatggttatggcagcactgcataattcttactgtcatgccatccgtaagatgctttct  
gtgactggtgagttactcaaccaagtattctgagaatagttatgcggcagccagttgctcttccccggcgtcaatacgggataataccg  
ccacatagcagaactftaaaagtgctcatcattgaaaacgttcttggggcgaaaactctcaaggatctaccgctgttgagatccagttcag

gtaaccactcgtgcaccaactgatcttcagcatctttactttcaccagcgttctgggtgagcaaaaacaggaaggcaaaatgccgcaaaa  
aaggaataagggcgacacggaaatgtgaatactcatactcttctttcaatattattgaagcattatcagggtattgtctcatgagcggata  
catattgaatgtatttagaaaaataaacaatatgggggtccgcgacattccccgaaaagtgccact

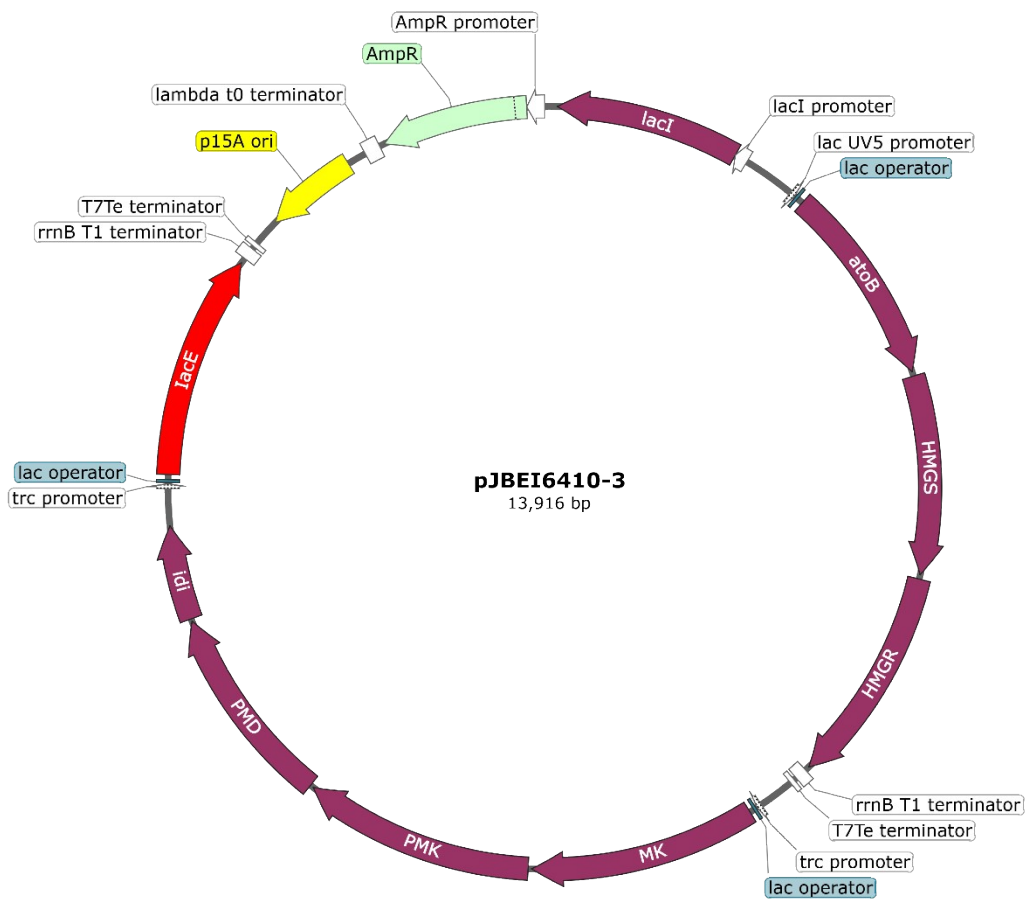

Fig. S4 The structure illustration of plasmid pJBEI6410-4. In this plasmid, the prenyltransferase *IacE* was inserted after the *trc* promoter.

Plasmid sequence of pJBEI6410-3:

gacgtcgggtcctaataatgagtagtaacttacattaatgcgttgctcactgcccgtttccagtcgggaaacctgctggtccagctgcatta  
atgaatcggccaacgcgcggggagaggcggtttgctattggcgccagggtggtttttccaccagtacgggcaacagctgattgc  
ccttcaccgctggccctgagagagttgagcaagcggtccacgctggtttgccccagcaggcgaatacctggttggatggtggttaacggc  
gggataaacatgagctgtctcggatcgtcgtatccactaccgagatgtccgcaccaacgcgcagcccggactcggtaatggcgcgcat  
gccccagcgccatctgatcgttggcaaccagcatcgagtgggaaacagatgccctcattcagcatttgcattggttggaaaaccggacatg  
gcactccagtcgcttccgttccgctatcggtgaattgattgagtgagatattatgccagccagccagacgcagacgcgccgagaca  
gaactaatgggcccgtaacagcgcgattgctggtgacccaatgcgaccagatgtccacgcccagtcgcgtaccgtcttcatgggagaa  
aataatactggtgaggtgctggtcagagacatcaagaataacgccggaacattagtcagggcagcttccacagcaatggcatcctggtc  
atccagcggatgtaataatgacagccactgacgctgctgcgagaaagattgtcaccgcccgtttacaggcttcagcggccttcttacc  
atcgacaccaccagctggcaccagttgatcggcgcgagatftaatgccgcgacaattgagcggcgcgctgagggccagactggag  
gtggcaacgcaatcagcaacgactgtttcccgcagttggtgccacgcggttgggaatgtaattcagctccgccatcgccgttccacttt  
tccccggtttcagaaaacgtggctggcctggtcaccacgcgggaaacggctgataagagacaccggcatactctgcgacatcgataa  
cgttactggtttcattcaccacctgaattgactcttccggcgcctatcatgccataccgcgaaagggttttgcgccattcaggtgctcgg  
gatctcagcgtctccttatgcgactcctgcattaggaagcagcccagtagtaggtgaggccgttgagcaccgccgcgcaaggaatgt  
gcatgcaaggagatggcggcccaacagtcccccggccacggggcctgccaccatacccacgccgaaacaagcgtcatgagcccgaagt  
ggcgagcccgatctccccatcggtgatgctggcgatataggcgccagcaaccgacctgtggcggcgggtgatgcccggccagatgctc  
cggcgtagaggatcgagatcgttaggcaccccaggccttacctttatgcttccggctctataatgttggaaattgtgagcggataacaattc  
agaattcaaaagatcttaggaggaatataaaatgaaaatgtgtcatcgtcagtgccgtactgctatcggtagtttaacggttcactcgt  
tccaccagcgcctacgactggggggcagacgaataaagccgccattgaacgtgcaaaaatcattcacaacacgttgatgaagtattatg  
ggtaacgtgttacaagccgggctggggcaaaatccggcgcgtcaggcactgttaaaaagcgggctggcagaaaacgggtgctgagttcacg  
gtcaataaagtatgtgttcgggtcttaaaagtgtggcgttccgccagccattcaggcaggtcagggcagagcattgtggcggggggg  
tatggaaaatagatttagccccctacttactcagatgcaaaagcagcctctggttatcgttggagcggacaggtttatgacgtaactctgcg  
cgatggcctgatgtgcccaccatggttatcatatggggattaccgccgaaaacgtggctaaagagtagcgaattaccggtgaaatgcagg  
atgaactggcgtacattcacagcgtaaagcggcagccgcaattgagtcgggtgctttacagccgaaatcgtcccggtaaatgttgcactc  
aaagaaaacctgcttctcagtaagacgagttcccgaagcgaactcaacggctgaagcgttaggtgattgcccggccttcgataaag  
caggaacagtcaccgctgggaacgcgtctggtattaacgacggtgctcggcctctggtgattatggaagaatctcggcgctggcagcagg  
ccttaccctcctgctcgttaaaagtattgccagcgggtggcgtgccccccgattgatgggtatggggccagctcaccacgcaaaaag  
cgttacaactggcggggctgcaactggcgatattgatctcattgaggctaatgaagcatttgcacagttccttgcggtgggaaaaacctg  
ggctttgattctgagaaagtgaatgcaacggcggggccatcgcgctcgggcatcctatcggtgccagtggtgctctattctggtcacactatt  
acatgccatgagggcagcgataaaacgctggggctggcaactgtgattggcggcgggtcaggaattgcgatggtgattgaacgggtg  
aattgagatctgaattaaggagacagctaaatgacaatggtatcgataaaataaactttacgttccaaagtactatgtagacatgctaaa  
ttagcagaagcagccaagtagaccaaaacaaattttaattggaattggtcaaacgaaatggctgttagctgtaaaccaagacatcgtttca  
atgggcgtaacgctgtaaggacattataacagacgaagacaaaaagaaatggatggaattgtggcaactgaatcagcagttgatgct  
gctaaagcagccgctgttcaattcacaactattaggtattcaacctttgcacgctgctttgaaatgaaagaagctgttatgctcaacaccag  
caattcaattagctaaagattatttagcaactagaccgaatgaaaaagtattagttattgctacagatacagcagttatggattgaactagggc  
gcgagccaacacaaggtgctggcgcagttcgatggttattgcacataatccaagcattttggcattaaatgaagatgctgttgccttactgaa  
gacgtttatgatttctggcgtccaactggacataaaatccattagttgatggtgcattatctaaagatgcttatatccgctcattccaacaaagctg  
gaatgaatacgaacgtaaggttaagtcgctagctgactcgcactctatgcttccatgtccatttcaaaaaatgggtaaaaaggcattaga  
gtcaatcattgataacgctgatgaaacaactcaagagcgtttacgttcaggatgaaagatgctgtagattataaccgttatgctggtaaatattata  
ctggatcattatattaaagcctaataatcattactgaaaaatcagatftacaagctggtgaaacaatcggttattcagttatggctcaggttcagttg  
gtgaattttatagtcgacattagttgaaggctacaagatcatttagatcaagctgcacataaagcattattaataaccgtactgaagtatctgtt  
gatgcataatgaaaccttcaaacgtttgatgacgttgaatttgacgaagaacaagatgctgttcatgaagatcgtcatattttctacttataaat  
attgaaaataacgttcgcaatatacagaccagagtaattagatctattcaggaaacagaccatgtccatgcaagtttagataagaattttc



acatttatctcgtaaagaaaagtacaacaattggttgataagcaatggtatcagaagaacaattcgacatttactgaatcatcattaatc gatg  
aagaagtagccaatagtttaattgaaaatgcatcgcgcgaaggtgcattaccggttgatttaccgaatatcattgtggacgataaggcatatg  
ttgacctatgatggtggaagagccttcagttgctgctgcagctagttatggtgcaaagctagtgatcagactggcggattfaaacggatctt  
ctgaacgtattatgataggcaaatcgtctttgatggcgtgacgatactgaaaaattatcagcagacattaagccttagaaaagcaaatcataa  
aattgcggatgaggcataccttctattaagcgcgtggtggtggtaccaacgtatagcgattgatacattcctgagcaacagtactatcttta  
aaagtattgtgatacgaagatgctatggcgctaatatgcttaatacatttttagaggccataactgcatttttaaaaaatgaattccgcaaag  
cgacatttaagtagtatttatccaatcatgcaacagcgtccgtgttaagttcaaggcgaaattgatgtaaaagattgaagggggcgagag  
aactggagaagaggtgccaacgaatggaacgtcttctgattggccaagtagatattcatcgtgcagcaacacataataaagggtgtatg  
aatggcatacatgctgtgttttagcaacaggaaatgatacgcgtggtgcagaagcaagtgccatgatacgcgagtcgtgacggacagat  
cgtggtattgctacatggcgttacgatcaagatcgaacgattgattggtacaattgaagtgcctatgacattggcaatcgttggcgggtgata  
aaagtattaccaattgctaaagcttattagagctactaaatgtagtgcagcacaagaattaggtcatgtagttgctgctggttttagcgcaa  
aactttgcagcatgctgcgcgtgtgtcagaaggtatcaacaaggtcatatgagttacaataaaatcattagctatcgtttaggggcaaaa  
ggtgatgaaattgctaaagtagctgaagcttgaaaaaagaaccccgtaaaatacacaagcagcggaaacattttacaagaaattagacaa  
caataaggatcttttaaggatctccaggcatcaataaaaagaaaggtcagtcgaaagactggccttctgtttatctgtttgtcgggtgaa  
cgctctactagagtcacactggctcaccttcgggtggccttctgctgttatagcgaattgatctggttgacagcttatcatcactgcacgg  
tgcaccaatgcttctggcgtcaggcagccatcggagctgtggtatggctgtgcaggtcgtaaatcactgcataattcgtgctcgaaggcgc  
actcccgttctgataatgtttttgcgccacatcataacggttctggcaaatctgaaatgagctgttgacaattaatcatccggctcgtataat  
gtgtggaattgtgagcggataacaatttcaggatctaggaggaaataacctgtctctgccattcctgacgtctgcgccaggttaaggatcatc  
ttcggcgagcactctgcggtgfacaataagccggcctcgtcgcctctgtgctgcttacgcacctacctgctgatcaggaattcttctgcac  
cggacacgatcagctggacttccggacatcagctcaaccacaagtgagcatcaacgactcaacgcgatcacggaggaccaggtgaa  
cagccaaaagctggccaagccagcaagcaaccgacggtctgtctcaggagctggtgtctctgctgacccgctgttagcgcagttaagc  
gagagctccattaccacgccgcttctgctcctgtacatgtctgttgcctgtgcccgcacgaaagaacatcaagttcagcctgaagagcac  
gctgccgattggcgcaggcttaggctctagcgcctatcagcgtgagcctggcgtgctgcatggcctatctgggtggcctgattggcagca  
acgacctggagaactgagcgaacgacaagcagatcgtgaaccagtgggcctttatcggcgagaagtgcattcatggcaccggagcgc  
gcattgacaacgcagttgccacgtatggcaacgccctgctgttcgagaaagacagccacaacggcacgatcaacacgaacaactcaagttc  
ctggacgacttcccgggatcccgatattctgacctacaccgfatcccacgcagcaccgaagatttagtcgcccgcgtgctgttttagtca  
ccgaaaagtcccggaggtgatgaagccgatcctggacgcgatgggcgagtgccgctgcagggctgagatcatgaccaagctgagca  
agtgaagggcaccgacgatgagcgggtggagaccaacaatgagctgtacgagcagctgctggagctgatccgtatcaatcacggcctgc  
tggctctatcgggtgtctcaccggcctggaactgatcaaaaactgagcagcagctgctgctctacgaaattaacgggtgacg  
gtggcgggtgctcttcaacgctgctgcgccgtgacattacgaggagcaaatcagacgttcaagaagaagctgcaggacgactcagc  
tacgagacgttcgagacggacctggcggcagggctgttgcctgctgagcgcacaaaatctgaacaaggacctgaagatcaaaaagcctg  
gtgtccagctgttcgaaaacaagacgaccagaagcagcagatcagcagctgttactgccggtaacaccaatctgccgtgacgtctta  
aggatctaggaggagatcatatgagcgaattacgtgacattcagcgcgccaggttaaggcactgctggccggtgctacctggtttagacac  
caagtaggagcgttcgctgctgctgcttctgcccgtatgcatgagttgccaccctgatgtagcctgcagggctctgacaagttcgaagtg  
cgtgtgaagagcaagcagttcaaggacggcgagtggtgtaccacattagccaaagagcggcttcatccggtagcattggtggcagca  
agaaccatttatcgagaaggtcattgccaacgtcttcaacttcaagccgaatattggacgattactgcaaccgcaacctgttcgcatcgac  
atttcagcagcagcgtaccacagccaagaggactctgttacggagcatcgtgtaaccgccgctgagcttccacagccatcgattga  
ggaggtgccgaagacgggtctgggttctagcgggttttagttaccgtcttaacgacggcgttagcagcttctctgtagcagcactggagaa  
caactggacaagtagccgaaagtgattcataacctggcgcaggtggcaccattgtcagggcaaggttaagttgctctggtttgatgtggc  
agcggccgctatggtctatccgctatcggccttccgccggcctgatcgaatctgccggacatcggctctgcgacgtatggttagcaa  
actggcgcactggtggacgaagaagactggaacatcaccatlaagtctaatcacctgccgagcggcttaacgttatgtagggcgatatcaa  
gaacggcagcgaacggtaagctggtgcagaaagtgaaaaactgttacgacagccacatgccgaaagcctgaagatttacacggagct  
ggaccacgccaatagccgtttatggatggtctgagcaagctggaccgctgcacgaaccacgacgactacagcgacaaaatcttcgag  
agcctggagcgaatgactgcacctgccagaagtaccggagatcagggaggtccgcgatccgtggcaacgattccgctgacttccgc

aaaattacgaaggagagcggcgcgatcgaaccaccggtccagacgtctctgctggacgactgtcaaacctaaaggcggttaacgtg  
cctgattccggcgcggggtggttacgacgccattgccgtcatcacgaaacaggacgtcgtatctgcgcgacaaacggccaacgacaaacgt  
ttcagcaaagtccaatggctggatgttacgacggccgactgggggtgttcgcaaggagaaggacccggaaactatctggataagtgaggt  
ctaggaggattatgagatgaccgtttacacagcatccgttaccgacccgtcaacatcgcaacccttaagtattgggggaaaaggacacga  
agttgaatctgccccaattcgtccatatcagtgactttatcgcaagatgacctcagaacgttgacctctgcggctactgcacctgagttgac  
ggcacactttgtggttaattggagaaccacagcatcgacaatgaagaactcaaaattgtctgcgcgacctacgccaattaagaaaggaa  
atggaatcgaaggacgacctcattgccacattatctcaatggaactccacattgtctccgaaaataactttctacagcagctggtttagcttct  
ccgctgctggctttgctgcattggtctctgcaattgctaagttafaccaattaccacagtcaacttcagaatatctagaatagcaagaaagggt  
ctggtcagctgtgagatcgtgtttggcggtacgtggcctgggaaatgggaaaagctgaagatggtcatgattccatggcagtacaaatgc  
agacagctctgactggcctcagatgaaagctgtgtcctagttgtcagcgtatataaaaaggatgtgagttccactcagggtatgcaattgacc  
tggaacctccgaactatftaaagaaagaattgaacatgctgtaccaaaagagattgaaatcatgctgaaagccattgtgaaaagattgcc  
acctttgcaaaggaaacaatgatggattccaactttccatgccacatggttgactttccctcaatattctacatgaatgacacttccaagcg  
tatcatcagttggtgccacaccattaatcagtttaccggagaaacaatcgtgcatacacgtttgatgcaggccaatcgtgtgttactacttag  
ctgaaaatgagtcgaaacttttgcattatctataaattgtttgctctgttctggatgggacaagaaattactactgagcagcttgaggtttca  
accatcaattgaaatcatctaactttactgcacgtgaattggatcttgagttgcaaaaggatgttgcagagtgatttactcaagtcggttcaggc  
ccacaagaacaacgaatctttgattgacgcaaaagactggctctaccaaaaggaataaggatctaggaggtaatgataatgcaaacggaacac  
gtcattttattgaaatgcacaggaggttccacgggtacgctggaaaatgatccgcacacaggcagacaccgcttaccatctcgcgttctca  
gttggctgttfaatgcaaaaggacaattatttagttaccgccgactgagcaaaaaagcatggcctggcgtgtggactaacctggttgtgg  
gcaccacaactgggagaagcaacgaagacgcatgacccggttgcggttatgagcttggcgtggaaattaccgctcctgaaatctatcta  
tctgactttcgtaccgcgccaccgatccgagtggtcattgtgaaaaatgaagtgtgtccggtatttgcgcacgcaccactagtcggtacag  
atcaatgatgatgaagtgatggattatcaatggtgtgatttagcagatgtattacacgggtattgatccacgccgtggcggtcagtcggtgatg  
gtgatgcaggcgacaaatcggaagccagaaaacgattatctgcattaccagcttaataaggatctcgcaaaaaacccgcttcggcggg  
ggtttttcggcactgcacgggtgcaccaatgcttctggcgtcaggcagccatcggaagctgtggtatggctgtgaggtcgtaaatcactgca  
taattcgtgctcaaggcgactcccgttctggataatgtttttgcccacatcataacggcttctggcaaatattctgaaatgagctgttgac  
aattaatcatccggctctgataatgtgtggaattgtgagcggataacaattcaggatctttaagaaggagatatacatggctatctcaaccctt  
ccaacggcgtaaagccatgtcgaaaagccttaccacaactgaaaagaggtcaataaaggcattgagacagacagtgaaagaccgagccttctg  
gtggggtgcttctgtagcctttggcctcgtctctcaggcaaatcactacaccaaggaagtgaacttactactcctcgttggttttaccaat  
ggattctaccggctctggggccacgacctctcagcggcaaaccttattaccgggtcttgattactcatgattgtcgcctttgagtacagtctca  
attggaagaaaagagttccaacagaccatccgtttactattgagcgggttacgaagcagctcggcacagccagcagatcctatcaaccagc  
tcggcgcaaaaggagttcctggaagcagctccaaggatgttctggtatggatctcacgcgattcaaccagtttctgaggcaaccaacgtacc  
caacgactgcgtagatgatccattgcaaaagcaccagcacacttccctcgcagccggttggatcgtttgacttggagcactctggcaac  
ctfatggccaagtcatacttctgccgattggcgtgcgatccagagcggatctcggccaataccatcattggcgataggtcaaggagtga  
acaaggcggacgggtcgtctacgacgggtcgtgaacgccattgagtcgtacctggcaacgttcacgcgaccggaggagggcggcag  
atgggactgtgtcaaatgactgctggccgaaacgccggctcgcctcaaggtctatttccgctcctcggcggacacgctcggcaaggc  
caaggacatgfacaactgggtggcggcctgaagggcccaagatggatgccagcctcaagggtatcagtgattctggtaccacctgttgg  
cctcgacagctccgaccggcctctgatgacaaggctgtatcggcaaccacaagtgattttcgtctacgagatgcgctcctcgaaggctc  
ggagcccgatattgatgtcaagtccacatccaatgtggcagcttgtaagacggatgggagattagcagctgctgcttcttggctcag  
agccatggtcaccctgatctcgcctcaggtataagtctgacttggcagcggcatttccaagcacaatattacgggcaagagtgtaggaacc  
catactfacatctccatcactcacaccaagacgggattgtacatgacctgtatctcagcccgaaactgcccagtttactactaaggatc  
caactcgagtaaggatctccaggaatcaataaaacgaaaggctcagtcgaaagactgggcttctgtttatctgtttgttcgggtgaacgc  
tctctactagagtcacactggctcacttccgggtggcctttctcgtttatactaggatataattccgcttctcgtcactgactcgtctacgctc  
ggctgtcactgcggcgagcggaaatggcttacgaacggggcggagatttctggaagatgccaggaagataacttaacagggaaagtgag  
aggcggcgggcaaaagcgttttccataggctccgccccctgacaagcatcacgaaatctgacgctcaaatcagtggtggcgaacccga  
caggactataagataaccaggcgtttccccctggcggctccctcgtgcgtctcctgcttctcgttctgcttccggttaccgggtcattccgctgtatg

gccgcgttgtctcattccacgcctgacactcagttccggtaggcagttcgcctccaagctggactgtatgcacgaacccccgttcagtcgga  
ccgctgcgccttatccggtaactatcgtcttgagccaacccggaaagacatgcaaaagcaccactggcagcagccactggtaattgatttag  
aggagttagcttgaagtcagcgcggtaaggtaaaactgaaaggacaagtttggtagctgcgctcctccaagccagttacctcgggtcaa  
agagttgtagctcagagaacctcgaacccgacctgcaaggcgggtttttcgtttcagagcaagagattacgcgcagacaaaaacgatct  
caagaagatcatctattaatcagataaaatatttagatttcagtgcaattatctctcaaatgtagcacctgaagtcagccccatacagataag  
ttgttactagtgctggattctaccaataaaaaacgcccggcgcaaccgagcgttctgaacaaatccagatggagttctgaggtcattactgg  
atctatcaacaggagtcgaagcagctcgtaaactggctgacagttaccaatgcttaatcagtgaggcacctatctcagcgatctgtctattc  
gttcatccatagttgcctgactccccgtcgtgtagataactacgatacgggagggccttaccatctggccccagtgctgcaatgataccgcgaga  
ccccagtcaccggctccagattatcagcaataaacagccagccggaagggccgagcgcagaagtggtcctgcaactttatccgctcca  
tccagctattaattgttccgggaagctagagtaagtagttccgagtaataagtttgcgcaacgttggccattgctacagggcatctggtgtc  
acgctcgtcttggtagcttattcagctccggttcccaacgatcaaggcagttacatgatccccatggtgtgcaaaaaagcggtagct  
ccttcggtcctccgatcgtgtcagaagtaagttggccagtggtatcactcatggttatggcagcactgataattcttactgtcatgccatcc  
gtaagatgctttctgtgactggtgagtaactcaaccaagtcattctgagaatagtgatcggcgaccgagttgctcttccccggcgtcaatacg  
ggataataccgccacatagcagaactttaaagtgtcatcattggaaaacgttcttcggggcgaactctcaaggatcttaccgctgttga  
gatccagttcagtaaccactcgtgcaccaactgatcttcagcatctttactttaccagcgttctgggtgagcaaaaacagggaaggcaa  
aatgccgcaaaaagggaataaggcgacacggaaatgttgaatactatactctctcttttcaatattatgaagcatttatcagggttattgtct  
catgagcggatacatattgatgtatttagaaaaataacaaatagggttccgcgcacatttccccgaaaagtccacct

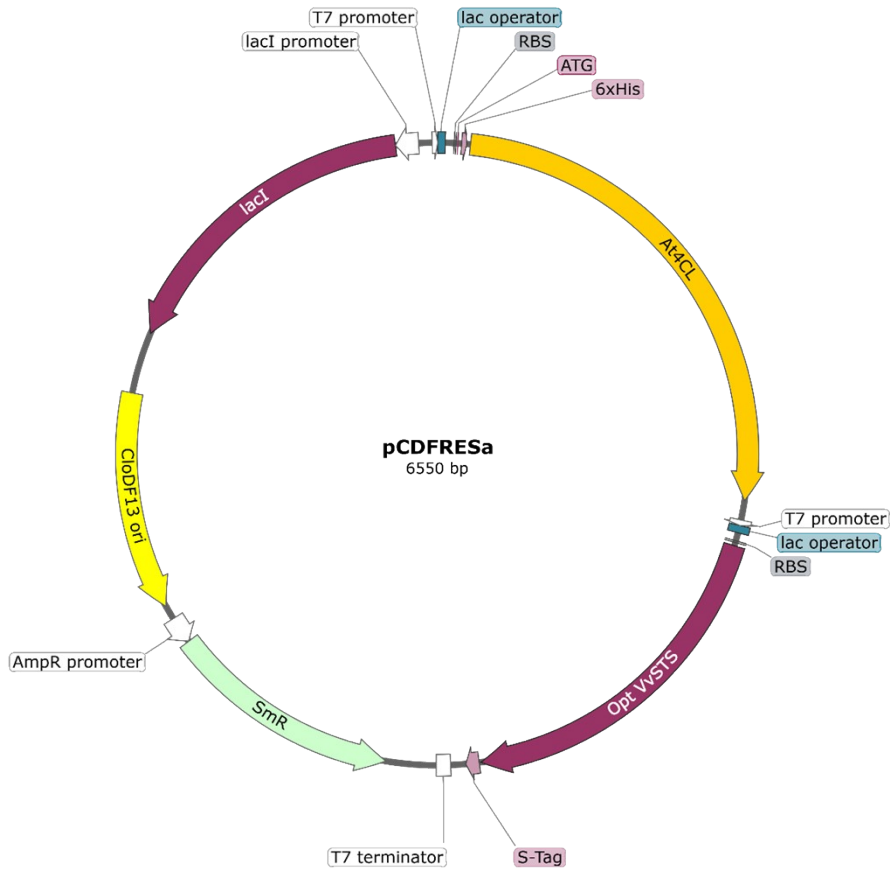

Fig. S5 The structure illustration of plasmid pCDFRESa. The codon optimized At4CL was inserted between restriction sites BamHI and NotI, so that it was expressed with a 6 × His tag at the N-terminal. The codon optimized VvSTS was inserted between restriction sites NdeI and XhoI.

Plasmid sequence of pCDFRESa:

ggggaattgtgagcggataacaattcccctgtagaataatftttgfttaactttaataaggagatataccatgggcagcagccatcaccatcatca  
ccacagccaggatccgatggcggcgcggaacaggcgggttctcaggttatggaaaaacagtctaacaacaactctgacgttatcttccg  
ttctaaactgccggacatctacatcccgaaccactgtctctgcacgactacatctccagaacatcttgaattcgcgaccaaaccgtgctga  
taacgggtccgaccggcacgttacactactctgacgttacgttatctctctgcagatcggcgaactccacaaactgggtgtaaccag  
aacgacgttgttatgtctgtctgccgaactccccggaattcgttctgtcttctggcggcgtcttccgtgggtgacccgacccggcga  
accgttcttccccggcggaaatcggaaacaggcgaagcgttaacaccaaactgatcatcaccgaagcgggttacgttgacaaaatc  
aaaccgtcgcagaacgacgacgggtgtgtatcgttgcacgcacgacaacgaatctgttccgatcccgaagggtgctgcgttaccgaac  
tgaccagcttaccaccgaagcgtctgaagtatcactctgtgaaatctctccggacgacgttgtgctgctgccgtactcttctggtaccaccg  
gtctgccgaaagggtgtatgtgaccacaaaggctgtgtacctctgttgcgcagcaggtgacgggtgaaaaccggaacctgtacttccactc  
gacgacgttatctgtgcttctgccgatgttccacatctacgcgtgaactctatcatgctgtgctgctgctgttgggtgcccgcacctgatc  
atgccgaaattcgaatcaacctgctgctggaactgatccagcgttgcgaagtaccgttgcgccgatggttccgccgatcgttctggcgatc  
cgaatcttctgaaaccgaaaaatacgcacctgtcttctatccgtgtttaaactctggcgcggcggcgtgggtaagaactggaagacgcgg  
taacgcgaaattcccgaacgcgaaactgggtcagggttacggtatgaccgaagcgggtccgggttctggcgatgctctgggttccgcaaa  
aacgttcccgggttaaatctggcgtgcggtaccgttctgtaacgcggaaatgaaatcgttgaccggacaccgggtgactctctgtctct  
aacccagccgggtgaaatctgcatccgtgggtcaccagatcatgaagggtacctgaacaaccggcggcggcggcggaaaccatcgacaaa  
gacggttggcgcacaccgggtgacatcgggtgatcgcacgacgacgaactgttcatcgttgaccgtctgaaagaactgatcaatacaaaa  
ggttccaggttgcggcggcggaaactggaagcgtctgatcgggtcaccggacatcaccgacgttgcgggttgcgatgaaagaagaag  
cggcgggtgaagtccgggtgcttctgtttaaactaaagactgaaactgtctgaaagacgacgttaaacaggtcgttctaaacaggtgtttt  
ctacaaactatcaaaaagtttttaccgaatctatcccgaagcggcgtctgtaaactctgcgtaaacactgcgtgcgaaactggcg  
aacggtctgcccggcgcataatgcttaagtcgaacagaaagtaatcgtattgtacacggcgcataatcgaatataacgactactatagg  
gaattgtgagcggataacaattcccactctagatattagtttaagataagaaggagatatacatatgatggcgtctgttgaagaattccgtaac  
cgcagcgtgcgaaagggtccggcgaccatcctggcgatcgggtaccggcggacccggaccactgcgttaccagctgactacgggactacta  
cttccgtgttaccaaatctgaacacatgaccgaactgaaaaaaaaaattcaaccgtatctgcgacaaatctatgatcaaaaacgttaccacc  
tgaccgaagaaatgctggaagaacaccgaacatcgggtgcgtacatggcggcgtctctgaacatccgtcaggaatcatcaccggcgaagt  
ccgcgtctgggtcgtgacgcggcgtgaaagcgtgaaagaatggggcagccgaaatcaaaatcaccacctggttttgcaccacctct  
gggttgaatcgggggtgcggactacaactggcgaacctgctgggtctgaaacctctgttctgctgtgttatgctgtaccaccagggtgct  
acgcgggtggtaccgttctgctgaccgcgaaagacctggcggaaaacaacgcgggtgcgcgttctggtgttctgctgaaatcaccgtg  
ttacctccgtggtccgtgaaagcgcgtggactctctggttggcagggcgttctgggtgacgggttcttctgcggttatcgttgggtgacc  
ggacgttctatcgaactcctgcttccagctggttctgcccgcagacctcatcccgaactctgcgggtgcatcgcgggtaacctgctg  
gaagttggtctgacctccacctgtggccgaacctccgacctgatctctgaaacatcgaaaaatgctgaccaggcgttcgaccgctg  
ggtatctgactggaactctctgttctggatcgcgcacccgggtggtccggcgatcctggacgcggtgaaagcgaactgaacctgaaaa  
aaaaaactggaagcgaacctcactgtctgtaaacgtaacatgtcttctgctgctgttctgttcatctggacgaaatgcgtaaaaaat  
ctctgaaagtgaaaaagcaccaccgggtgaaggtctggactgggtgttctgttctggttccgggtctgacctgaaaccgttcttct  
gcactctgttccgaccgttaccactaatctggtaaagaaccgtctgcgaaattgaaagccagcaccatggactcgtctactagcgcagct  
taattaacctaggctgctgccaccgtgagcaataactagcataacccttggggccttaaacgggtcttgagggtttttgctgaaacctca  
ggcatttgagaagcacacgggtcacactgctccggtagtcaataaacggtaaacagcaatagacataagcggctatttaacgacctgcc  
tgaaccgacgaccgggtcatcgtggccggatcttgcggccctcggctgaacgaattgttagacattattgcccactaccttgggtatctcgc  
cttccagtagtgacaaattctccaactgatctgcgcgcaggccaagcagatcttcttcttcaagataagcctgctactagctcaagatgac  
gggtgatactggcggcaggcgtccattgccagtcggcagcagacatcctcggcgcgattttgccgggtactgcgctgtacaaaatgc  
gggacaacgtaagcactacattctcctatcggcagccagtcggcggcggcagttccatagcgttaaggttcaatfagccctcaaatagatc  
ctgttcaggaaaccggatcaagagttctccgccgtggacctaccaaggcaacgctatgttctctgttttgcagcaagatagccagatcaa  
tgtgatcgtggctggtcgaagatactgcaagaatgtcattgcgctgccattctcaaatgcagttcgcgcttagctggataacgccacgg  
aatgatgctgctgcacaacaatggtgactctacagcgggagaatctcgtctctccaggggaaagcgaagttccaaaaggtcgtgatc

aaagctcggcgttgtttcatcaagccttacggcaccgtaaccagcaaatcaatatactgtgtggcttcaggccgcatccactcgggagc  
cgtacaaatgtacggccagcaacgtcgggtcagatggcgtcgcgatgacccaactacctctgatagttgagtcgatacttcggcgatcaccg  
cttcctcatactcttcttttcaafattattgaagcatttatcagggttattgtctcatgagcggatacatattgaatgtatttagaaaaataacaaa  
tagctagctcactcggctcgtacgtccggcggtgagactcggcggcgctcgggacacatacaaaagttaccacagattccgtggataa  
gcaggggactaacatgtgaggcaaacagcagggccgcggcgtggcgttttccataggctccgccctcctgccagagttcacataaaca  
gacgctttccgggtgcatctgtgggagccgtgaggctcaacctgaatctgacagctacgggcgaaacccgacaggactaaagatccccacc  
gtttccggcgggtcgtcctcttgcgtctcctgttccgacctgccgtttaccggatactgttccgctttctcccttacgggaggtggcg  
ctttctcatagctcacacactggatctcggctcgggtgtaggtcgttcccaagctgggctgtaagcaagaactccccgtcagcccactgc  
tgcgcttatccggtaactgttcaactgagccaacccggaaaagcacggtaaacgccactggcagcagccattgtaactgggagttcgca  
gaggattgttagctaaacgcgggtgctctgaagtgtgcgcaaaagtcggctacactggaaggacagattggtgctgtgctctcgaa  
agccagttaccacggtaagcagttccccaaactgactaacctcgcatacaaacctccccaggtggttttctttagggcaaaaagttac  
gcgcaaaaaaaggatctcaagaagatccttgatcttttactgaaccgctctagattcagtgcaatttatcttcaaatgtagcacctgaa  
gtcagccccatagatataagttgaattctcatgttagtcatgccccgcgccaccgggaaggagctgactgggtgaaagctctcaaggcat  
cggctgagatcccgggtcctaagtgtgagtaacttacattaattgcttgcgctcactccccgtttccagtcgggaaacctgtctgcccag  
ctgcattaatgaatcgccaacgcgcggggagagggcgttgcgtattgggcgccagggtggttttctttaccagtgagacgggcaacag  
ctgattgcccttaccgcctggccctgagagagttgagcaagcggctccacgctggttggccccagcagggcaaaatcctgtttgatggtggt  
aacggcgggatataaacatgagctgtctcgggtatcgtatccactaccgagatgtcgcaccaacgcgcagcccggactcggtaatggc  
gcgattgcccagcgcctatctgatcgttggcaaccagcatcgcagtgggaacgatgccctcattcagcatttgcatggtttgtgaaaaccg  
gacatggcactccagtcgcttcccgttccgctatcggctgaatttgattgcgagtgagataattatgccagccagccagcagcagcgcgcc  
gagacagaacttaatgggccgctaacagcgcgatttgctggtgaccaatgcgaccagatgctccacgccagtcgctaccgtctcatg  
ggagaaaaataactgttgatgggtgctggtcagagacatcaagaaataacgccggaacattagtgagggcagctccacagcaatggcattc  
ctggtcatccagcggatagtaatgatcagcccactgacgcgttgcgcgagaagattgtgcaccgccctttacaggcttcgacgccgttctg  
tctaccatcgacaccaccagctggcaccagttgatcggcgcgagatttaacgccgcgacaatttgcgacggcgcgtgcagggccagac  
tggaggtggcaacccaatcagcaacgactgtttcccgcagttgtgtccacgcgggtgggaatgtaattcagctccgccatcgccgctt  
ccacttttcccgcgttttcgagaacgtggctggcctggtcaccacgcgggaacggctctgataagagacaccggcactactctcgacat  
cgtataacgttactggtttcattccaccctgaattgactcttccggcgctatcatgccataaccgcgaaagggttttgcgccattcagatgt  
gtccgggatctcagcgtctcccttatgcgactcctgcattaggaattaatacagactactata

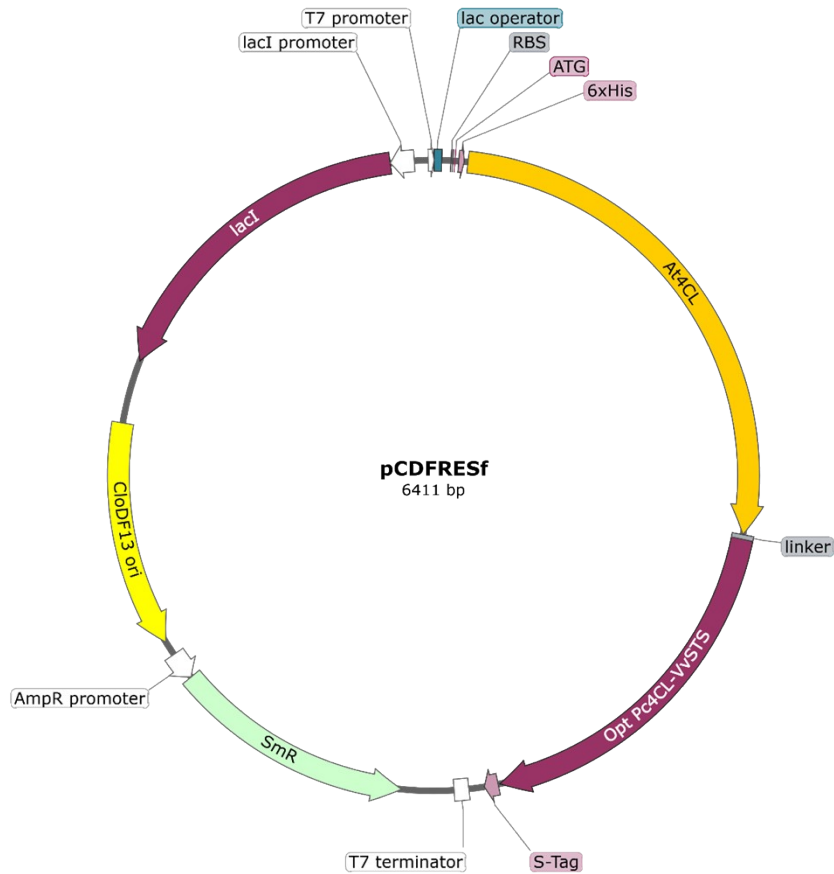

Fig. S6 The structure illustration of plasmid pCDFRESf. The codon optimized At4CL and VvSTS were expressed as a fusion protein, linked with a rigid linker (EAAAK) between the C-terminal of At4CL and the N-terminal of VvSTS. The fusion protein was inserted between restriction sites BamHI and NotI, so that it was expressed with a 6 × His tag at the N-terminal.





cgctcgatgacccaactacctgatagttgagtcgatactcggcgatcaccgctccctcatactctccttttcaatattattgaagcattat  
cagggttattgtctcatgagcggatacatattgaaatgatttagaaaaataacaaatagctagctcactcggctcgtacgctccggggtgag  
actcggcgggcgctgcggacacatacaaagtaccacagattccgtggataagcaggggactaacatgtgaggcaaacagcagggcc  
gcggcggtggcgttttccataggtccgccctcctgccaggttcacataaacagacgctttccgggtgatctgtgggagccgtgaggtca  
acatgaatctgacagtacggcgaaacccgacaggactaaagatccccaccgttccggcggtcgtcctcttgcgctcctctgtccg  
acctgcggttaccggatacctgttccgcttttcccttacgggaagtgtggcgctttctcatagctcacacactggtatctcggctcgggtgag  
gtcgtcgtccaagtgggtgtaagcaagaactccccgtcagccgactgctgcgcttatccgtaactgttcaactgagccaacccgg  
aaaagcacggtaaacgccactggcagcagccattggaactgggagctgcagaggattgtttagctaaacacgcggttgccttgaagt  
tgcgccaagtccggctacactggaaggacagattgggtgctgctcgcgaaagccagttaccacggtaagcagttccccaactgactta  
acctcgtacaaaccctcccaggtggttttcttacagggcaaaagattacgcgcagaaaaaggatcagaagatcctttagctct  
ttctactgaaccgcttagattcagtgcaattatctctcaaatgtagcacctgaagtcagcccatacagataaagtgttaattctatgttagtc  
atgccccgcgccaccggaaggagctgactgggtgaaagctcgaaggcagcgtcgcgagatccgggtgcctaagagtgagtaactta  
cattaattgcgttgcgctcactgcccgtttcagtcgggaacctgtcgtgcagctgcattaatgaatcgccaacgcgcggggagaggcg  
gtttgcgtattggcgccagggtggtttttcttaccagtgagacgggcaacagctgattgccctcaccgctggccctgagagagttgcag  
caagcgggtccacgctggttgcggcagcagcgaatcctgtttgatgggtgtaacggcgggatataacatgagctgtctcgggtatcgtc  
tatccactaccgagatgcccaccaacgcgcagcccggactcggtaatggcgcgattgcgccagcgcctatgctgttggcaacca  
gcatgcagtggaacgatgcctcattcagcatttgcattggtttgtaaaacggacatggcactccagtcgcttcccgttccgtatcggc  
tgaatttgattgcgagtgagatattatgccagccagccagcagacgcagcgcggagacagaacttaattgggccgtaacagcgcgatttg  
ctggtgaccaatgcgaccagatgctccacgcccagtcgctacgcttcatgggagaaaaataactgttgggtgctctggtcagagac  
atcaagaaataacgcgggaacattagtcagggcagctccacagcaatggcatcctggtcatccagcggatagttatgacagcccactgac  
gcgttgcgagagaagattgtgcaccgccgtttacaggcttcgacgccgcttcttaccatcgacaccaccacgctggcaccagttgatc  
ggcgcgagattaatcggcgacaatttgcgacggcgcgtgcagggccagactggaggtggcaacccaatcagcaacgactgtttgcc  
cgccagttgttgcacgcggttgggaatgtaattcagctccgccatcggcgttccacttttcccgcgttttcgcaaacgtgggtggcct  
ggttaccacgcgggaaacggtctgataagagacaccggcactctgcgacatcgtataacgttactggttccacattcaccacctgaattg  
actcttcccggcgctatcatgccataaccgcgaaaggtttgcgccatcgtggtgtccgggatctcgacgctccttccatgcgactcctgc  
attaggaattaatacgaactactata

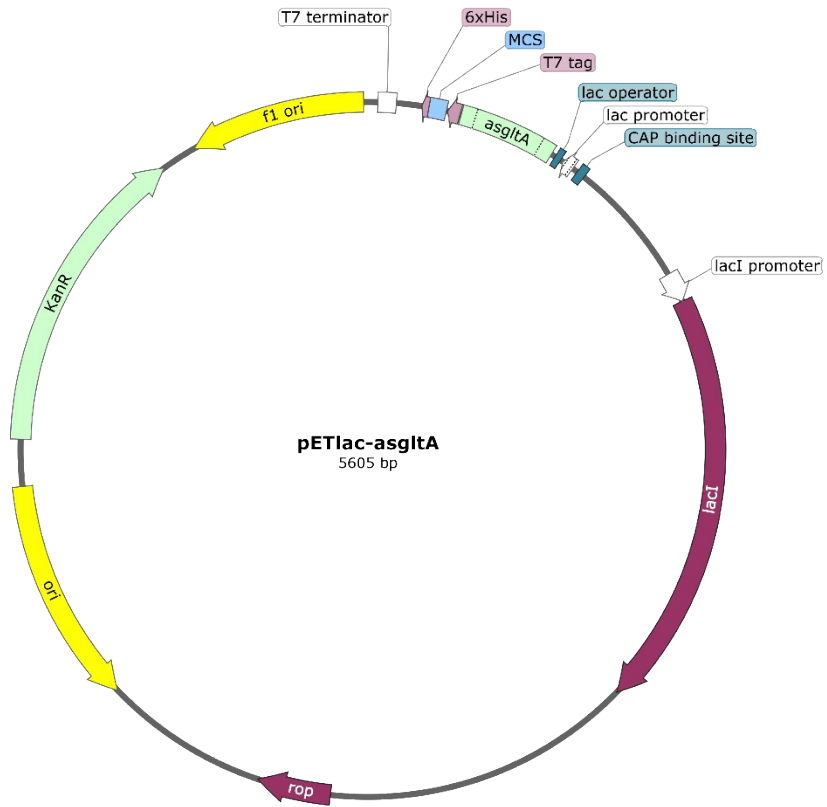

Fig. S7 The structure illustration of plasmid pETlac-asgltA. The T7 promoter was replaced by lac promoter amplified from pUC19, followed with the anti-gltA RNA frame.

Plasmid sequence of pETlac-asgltA:

atccggatagttcctcctttcagcaaaaaaccctcaagaccggtttagaggccccaaggggtatgctagttattgctcagcgggtggcagc  
agccaactcagcttccttcgggctttgtagcagccgatctcagtggtggtggtggtgctcgagtgccggcgaagcttgcgacgga  
gctcgaattcggatccgcgacccatttctgtccaccagtcagctagccatagaggaggaattaacctcagtggtggtggtggtggtg  
gtttccctcctttcacagagcggcgagccaaatacaaacgggtaaagccaggtgatgtgcgaaggcaatttaagttccggcagcttacg  
caataaggcgtaaggagacctaaatggctgatacaaaaagcaaacctcacctcaacggggacacagctgtgaactggatgtcaccacc  
accaccaccactgcatggttaattctcctccatggtgaaattgtatccgctcacaattccacacaacatacagccggaagcataaagttaa  
agcctgggggtgcctaagtgtagtgaactcacattaattgctgtgctcactgcccgtttcagctctagaagatctcagctctacgccg  
gacgcatcgtggccgcatcaccggcgccacaggtgcggttctggcgctatatacggcagatcaccgatggggaagatcgggctcgc  
acttccggctcatgagcgttcttggcggtggtatggtggcagggcccggtggcggggactgttggcgccatctccttgcagccat  
tcttgcggcggggtgctcaacggcctcaacctactactgggctgcttctaagcaggagtcgataaggagagcgtcgagatccggga  
caccatcgaatggcgcaaaccttccgggtatggcatgatacggccggaagagagtaattcagggtggtgaatgtgaaccagtaacgt  
tatacagatgctcgagagatgccggtgtctctatcagaccgttcccgctggtgaaccaggccagccacgttctcgcaaacgcgggaaa  
aagtggaaagcggcagtgccggagctgaattaccccaccggctggcacaacaactggcgggcaaacagctgttctgattggcgttgc  
cacctcagcttggccctgcacgcgccgtcgaaattgtcggcggttaaatctcgcgccatcaactgggtgccagcgtggtggtcgtgat  
ggtagaacgaagcggcgtcgaagcctgtaaagcggcggtgcacaactcttcgcgcaacgcgtcagtggtgctatcattaactaccgctgg  
atgaccagatgccattgctgtggaagctgctgcaactaattccggcgttatttctgatgctctgaccagacaccatcaacagattatttcc  
tccatgaagacggtacgcgactgggctggagcatctgctgcattgggtcaccagcaaatcgcgctgttagcgggccattaaagtctgtc  
tcggcgcttctgctgtggtggtggcataaatatctactcgaatcaaatcagccgatagcggaacgggaagcggcactggagtgccat  
gtccggttttcaacaacatgcaaatgctgaatgagggcatcttccactgcgatgctggttggcaacgatcagatggcgctggcgcaat  
gcgcgccattaccgagtcgggctgcgcttgggtcgatctcggtagtgggatacagcagatacgaagacagctcatgttataccgc  
cgttaaccaccatcaaacagatttccgctgctggggcaaacagcgtggaccgctgctgcaactctcagggccagggcgtgaaagggc  
aatcagctgttcccgtctactgggtgaaaagaaaaaccacctggcgcccaatcagcaaacccctctccccgcgcttggccgattcatta  
atgagctggcagcagaggttccgactggaaagcggcagtgagcgaacgaattaatgtaagtagctcactcattaggcaccgggat  
ctcgaccgatgcccttgagagcctcaaccagtcagctcctccgggtggcgccgggcatgactatcgtcggcacttatgactgtctcttt  
atcatgcaactcgtaggacaggtgccggcagcgtctgggctatttccggcagggaccgcttctgctggagcgcgacgatcggcctgtc  
gcttgcggtattcgaatcttgcagccctcgtcaagccttctcactggtcccgccaccaaacgttccggcgagaagcagccattatgcc  
ggcatggcgcccccacgggtgcgcatgatcgtctctgttggaggaccggctagctggcggggttgccttactggttagcagaatga  
atcaccgatacgcgagcgaactggaagcagctgctgctgcaaacgctcgcacactgagcaacaacatgaatggtcttccggttccggttcc  
gtaaagtctgaaacgcggaagtcagcgcctgcacattatgtccggatctgcatcgcagatgctgctggctacacctgtggaacacctac  
atctgtattaacgaagcgtggcattgacctgagtgatttctctgttcccgcgcatccataccgccagttgtttacctcacaacgttccagt  
aacgggcatgttcatcatcagtaaccgctatcgtgagcatcctctctcgttcatcgggtatcattaccccatgaacagaatcccccttacg  
gagcatcagtgaccaaacaggaaaaaaccgcccttaacatggcccgtttatcagaagccagacattaacgcttctggagaaactcaacga  
gttgacgcggatgaacaggcagacatctgtaactgctcagaccacgctgatgagcttaccgcagctcctcgcgcttctgggtgatga  
cgggtgaaaaccttgacacatgcagctcccggagacggtcacagcttctgtaagcggatgccgggagcagacaagccgtcagggcgc  
gtcagcgggtgttggcgggtgtcggggcagccatgaccagtcacgtagcagatagcggagtgatactggcttaactatggcgcag  
agcagattgtactgagagtgaccatatacgggtgtgaaataccgcacagatgcgtaaggagaaaataccgcatcaggcgtcttccgcttc  
ctcgtcactgactcgtcgtcgtcgttccggctcggcgagcgggtatcagctcactcaaaaggcgtataacgggtatccacagaatcagg  
ggataacgcaggaagaacatgtgacaaaaggccagcaaaaggccaagaccgtaaaaaggccgcttctgctggcgttttccataggct  
ccgccccctgacgagcatcaaaaatcagcgtcaagtcaaggtggcgaaaccgacaggactataagataaccaggcgttccccct  
ggaaagctccctcgtcgtctctgttccgacctccgcttaccggatacctgtcgccttctccttccgggaagcgtggcgttctctatag  
ctcacgctgtaggtatctcagttcgtgtaggtcgtcgtccaagctgggctgtgtgcacgaacccccgtcagcccagccgctcgcctta  
tccgtaactatcgttctgagccaaccggtaagacacgacttatcgccactggcagcagccactgtaaacaggattagcagagcaggtat  
gtaggcgggtgctacagattctgaagtgtggcctaactacggctacactagaaggacagtaattggtatctcgtcgtcgtgaagccagta

ccttcggaaaaagagttggtagctcttgatccggcaacaaccaccgctggtagcgggtgtttttgttgcaagcagcagattacgcgcag  
aaaaaaggatctcaagaagatccttgatctttctacgggtctgacgctcagtggaacgaaaactcacgttaagggttttggtcatgaaca  
ataaaactgtctgcttacataaacagtaatacaaggggtgffatgagccatattcaacgggaaacgtcttgcttagccgcgatfaaattccaac  
atggatgctgatttatatgggtataaatgggctcgcgataatgctgggcaatcaggtcgcacaatctatcgattgtatgggaagcccgatgcgc  
cagagttgttctgaaacatggcaaaggtagcgttccaatgatgttacagatgagatggtcagactaaactggctgacggaattatgcctcttc  
cgaccatcaagcattttatccgtactcctgatgatgcatggttactcaccactgcgatccccgggaaaacagcattccagggtattagaagaat  
cctgattcaggtgaaaatattgttgatgcgctggcagtgctcctgcgccgggttcattcgattcctgtttgtaattgtccttttaacagcgatcgcgta  
ttcgtctcgtcagggcgaatcacgaatgaataacgggttggtgatgcgagtgattttgatgacgagcgtaatggctggcctgttgaacaagtc  
tggaaagaaatgcataaaacttttccattctcaccggatcagtcgctcactcatgggtgatttctcacttgataacctattttgacgaggggaaatta  
ataggttgattgatgttgacgagtcggaatcgcagaccgataaccaggatcttccatcctatggaactgcctcgggtgagtttctccttattac  
agaaacggcttttcaaaaatggtattgataatcctgatatgaataaattgcagtttatttgatgctcgtatgagtttttaagaattaattcatgag  
cggatacatattgaaatgatttagaaaataaacaataggggtccgcgcacatttcccgaaaagtgccacctgaaattgtaaacgttaatt  
ttgtaaaattcgcgttaattttgttaaatcagctcatttttaaccaataggccgaaatcggcaaatccctataaatcaaaagaatagaccga  
gataggggtgagtggttccagtttgaacaagagtcactatfaaaagcgtggactccaacgtcaaggcgcaaaaaccgtctatcaggg  
cgatggcccactacgtgaaccatcacctaatacaagttttggggctcaggtgccgtaaaagcactaaatcggaaccctaaaggagcccc  
gatttagagctgacgggaaagccggcgaacgtggcgcgaaaaggaaaggaaagcgaaggagcgggcgctaggggcgtggcga  
gtgtagcggtcacgtcgcgtaaccaccacaccgccgcttaatgcgccgtacagggcgcgtccattcgcca

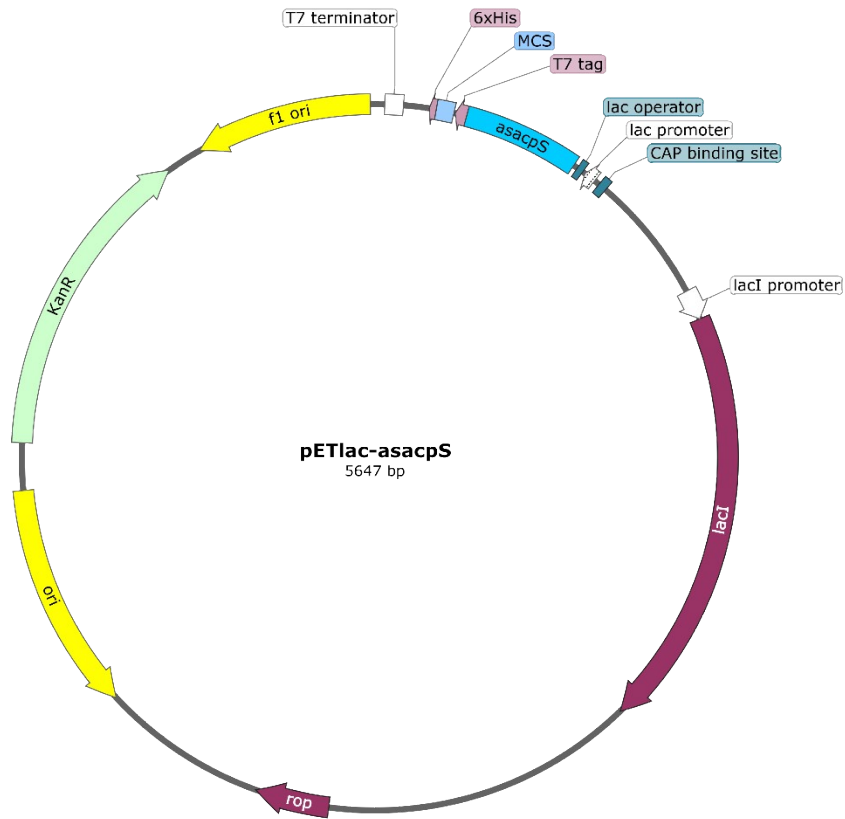

Fig. S8 The structure illustration of plasmid pETlac-asacpS. The T7 promoter was replaced by lac promoter amplified from pUC19, followed with the anti-gltA RNA frame.

Plasmid sequence of pETlac-asacpS:

atccggatagttctctctttcagcaaaaaacccctcaagaccgctttagaggccccaaggggtatgctagttattgctcagcgggtggcagc  
agccaactcagcttctcttggggctttagcagccggatctcagtggtggtggtggtgctcgagtgccggcgaagcttgcgacgga  
gctcgaattcggatccgcgacccatttgcgtccaccagtcagctagcaggaggaattaacctgcagtggtggtggtggtggtccatccct  
gagatgcatgaactgaatacggatccattattggtcgtcagtgatgaccggactgaaagatcgggtgcagaatgaagcgtctgatg  
ctggaagcgcgtggtaattggaatattagggttaggcacggatattgaggatcgcctcgcacgaagcggatcgcggatccggatc  
gcctggcagccgcgtattaagcgaatacgaatgcaccaccaccaccactgcatggttaattctctccatggtaaatgttatccgctc  
acaattccacacaacatagcagccggaagcataaagtgtaaagcctgggggtgcctaagagtgagtaactcacattaattgcgttgcgctca  
ctgcccgtttcagctcttagaagatctcgcctctacgccggacgcatctggtggccgcatcaccggcggcagggcgggttgcggc  
cctatatcgccgacatcaccgatgggaagatcgggctcggcacttgggctcagagcgttcttggcgtgggtatggtggcagggccc  
gtggccggggactgttggcggcctctccttgcacattccttgcggcggcgggtgctcaacggcctcaactactactgggctgcttc  
ctaagcaggagtcgataaggggagcgtcagatccggacaccatcgaatggcgcaaaaccttgcggatggcatgatagcggccg  
gaagagagtcattcagggtggtgaatgtgaaccagtaacgttatacagtcgcagagatgcccgtgctcttatcagaccgttcccgcgt  
ggtgaaccaggccagccacgttctgcgaaaacggggaaaaagtggaaaggcggatggcggagctgaattacatcccaaccgctggc  
acaacaactggcgggcaaacagctggtgctgattggcgttccacctcagcttggcctgcacgcggcctgcgaaattgctcggcgatta  
aatctcggccgatcaactgggtgcccagcgtggtgctcagtgatgagaacgaagcggcgtcgaagcctgtaaaggcggcgggtgcacaatc  
tctcgcgcaacgcgtcagtggtgctgacattatccgctggatgaccaggatgccattgctgtggaagctgctgactaatgttccggcg  
ttattctgatgtctctgaccagacacctcaacagtattttctccatgaagacggtacgcgactggcggtggagcatctggtcgcattgg  
gtcaccagcaaatcgcgtttagcggggcccaatagttctgctcggcgcgtctgctctggctggctggcataaatatctactcgaatcaa  
attcagccgatagcggaaagggagcactggagtgccatgctccggttcaacaacatgcaaatgctgaatgagggcagcgttcccac  
tgcgatgctggttccaacgatcagatggcgtggcgcaatgcgcgccattaccagtcgggctgctgctggtgctgagatctcggtag  
tgggatacgcgataccgaagacagctcatgttatatcccgcgttaaccaccatcaaacaggatttccgctgctggggcaaacagcgtgg  
accgctgctgcaactctcagggccaggcgggtgaaggcgaatcagctgttggcctgctcactggtgaaaagaaaaaccacctggcgcc  
caatacgcgaaaccgctctccccgcgcttggccgattcattaatgcagctggcagcagaggttcccactggaaagcggcagtgagcg  
caacgcaatfaatgaaagtagctcactcattaggcaccgggatctcgcaccgatgcccttgagagcctcaaccagtcagctcctccggtgg  
gcgcggggcatgactatctcggcgcactatgactgctcttcttatcatgcaactcgtaggacaggtgccggcagcgcctctgggtcatttccg  
cgaggaccgcttctgctggagcgcgacgatgatcgccctgctgcttgcggatattcgaatctgcacgccctcgcacagccttgcactggt  
cccgccaaaacttctggcgagaagcagccattatcggcgcatggcgccccacgggtgcgcatgatcgtgctcctgctggtgagga  
cccggctaggtggcgggttgccttactggttagcagaatgaatcaccgatacgcgagcgaactgaaagcactgctgctgcaaaactgct  
gagcactgagcaacaacatgaatggtcttgggttccggttctgtaaagtctgaaacgcggaagtcagcgcctgcaccattatgtccgga  
tctgcatcgcaggatgctgctggctaccctgtggaacacctatctgtatfaacgaagcgtggcattgacctgagtgattttctctggtccc  
gccgcatccataccgagctgtttaccctcaaacgttccagtaaccgggatgttcatcatcagtaaccgctatcgtgagcatcctctctgctt  
catcggatcattacccccatgaacagaaatcccccttacaggagcagctcagtgaccaaacaggaaaaaacggccttaacatggcccgtt  
tatcagaagccagacattaacgcttctggagaaactcaacgagctggacgcggatgaacaggcagacatctgtaactcgttcacgaccag  
ctgatgagcttaccgagctgcctcgcgcttccggtgatgacggtaaacctctgacacatgcagctccgggagacggtcacagcttctt  
gtaagcggatgccgggagcagacaagcccgtcagggcgcgtcagcgggtgttggcgggtgctggggcgcagccatgaccagctcagct  
agcgatagcggagtgatactggcctaactatcgccatcagagcagattgtactgagagtgaccatataatgcggtgtgaaataccgcag  
atgcgtaaggagaaaaataccgatcaggcgtcttccgcttccctcgtcactgactgctgctcggctgcttccggtcggcgagcgggtatc  
agctcactcaaaaggcggtaatacgggtatccacagaatcaggggataacgcaggaaagaacatgtgagcaaaaggccagcaaaaggccag  
gaaccgtaaaaaggccgcttctggcgttttccataggctccgccccctgacgagcatcaaaaaatgcagctcaagtcagaggtggc  
gaaaccgacaggactataagatacaggcgttccccctggaagctccctcgtcgcctccttccgacctgccgcttaccggatactt  
gtccgcttctccctcgggaagcgtggcgttctcatagctcacgctgtaggtatctcagttcgggtgtaggtcgttccgctcaagctgggctg  
tgtgcacgaacccccgtcagcccagcgtgcgcttaccgtaactatcgttctgagtcacaacccggtaagacacgacttatcgccactg  
gcagcagccactgtaaacaggattagcagagcaggtatgtagggcgtgctacagagttctgaaagtgtggcctaactacggctacactag

aaggacagtatttggatctgcgctctgctgaagccagttaccttcggaaaaagagttggtagctcttgatccggcaacaaccaccgctggt  
agcgggtggTTTTTgttgaagcagcagattacgcgcagaaaaaaggatctcaagaagatcctttgatctttctacggggctgacgctcag  
tggAACgaaactcacgftaagggatttgggtcatgaacaataaaactgtctgctfacataaacagtaatacaaggggtgtatgagccatattca  
acgggaaacgtcttctctagggcgcgattaaattccaacatggatgctgatttatgggtataaatgggctcgcgataatgctgggcaatcag  
gtgcgacaatctatcattgatgggaagcccgatgcgccagagttgttctgaacatggcaaggtagcgttgccaatgatgttacagatga  
gatggtcagactaaactggctgacggaattatgcctcttccgacctcaagcattttatccgtactcctgatgatgatggttactcaccactgcg  
atccccgggaaacagcattccaggtattagaagaatcctgattcaggtgaaaatattgttgatgcgctggcagtgctcctgcccgggtgca  
ttcgattcctgtttgtaattgtcctftaacagcgatcgcgtatttctctcgtcagggcgaatcacgaatgaataacggfttgggtgatgcgagtg  
atTTTgatgacgagcgtaatggctggcctgttgaacaagtctgaaagaaatgcataaacTTTTGCCattctcaccggattcagctcactcatg  
gtgatttctcactgataaccttattttgacgaggggaaattaataggttattgatgttgacgagtcggaatcgagaccgataccaggatct  
tgccatcctatggaactgcctcgggtgagtttctcctcattacagaaacggcTTTTcaaaaatattggtattgataatcctgatatgaataaattgca  
gtttcatttgatgctc gatgagtttctaaagaattaattcatgagcggatacatattgaaatgatttagaaaaataacaataaggggtccgcgca  
cattccccgaaaagtgccacctgaaattgtaaacgftaatattttgttaaaatcgcgftaaattttgttaaatcagctcatttttaaccaataggcc  
gaaatggcaaaatccctataaatcaaaagaatagaccgagatagggtgagtggttccagtttggaaacaagagtcactattaagaacgt  
ggactccaacgtcaaagggcgaAAAaccgtctatcagggc gatggccactacgtgaaccatcacctaataagTTTTGGGGtcgaggtg  
ccgtaaagcactaaatcggaaccctaaagggagcccccgatttagagcttgacggggaaagccggcgaacgtggcgagaaaggaaggga  
agaaagcgaaggagcgggcgctagggcgctggcaagtgtagcggtcacgctgcgcgtaaccaccacaccgccgcttaaatgcgcc  
gctacagggcgcgtccattcgcca

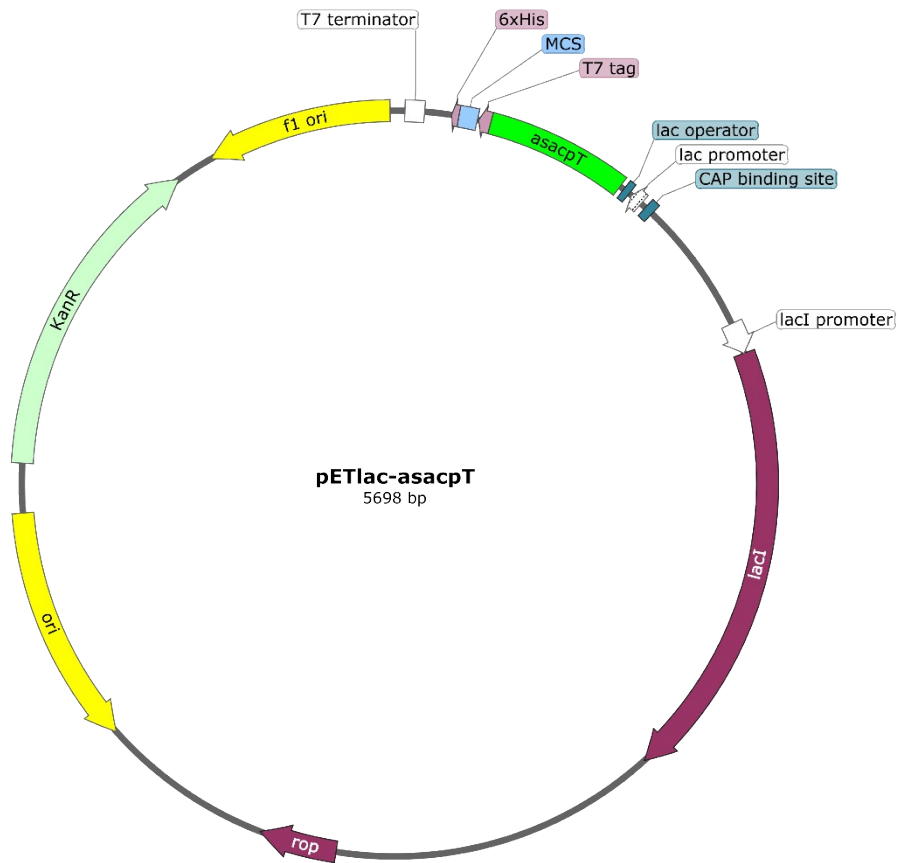

Fig. S9 The structure illustration of plasmid pETlac-asacpT. The T7 promoter was replaced by lac promoter amplified from pUC19, followed with the anti-gltA RNA frame.



Plasmid sequence of pETlac-asacpT:

atccggatagttcctcctttcagcaaaaaaccctcaagaccggttagagcccaaggggtatgctagttattgctcagcgggtggcagc  
agccaactcagcttccttcgggctttgtagcagccggatctcagtggtggtggtggtgctcgagtgccgcaagcttgcgacgga  
gctcgaattcggatccgcgacccatttctgtccaccagtcagctagcaggaggaattaacctgcagtggtggtggtggtgaaaggcg  
gtagcaaacggcgatttactggggccggcagaccgaaaagtcggttaccgggatgagggcacaagtgatacgatacgacttcatcttc  
cattaaacgttggccctgatgatcggatagttctggggaagtttcgacctaaagcgcagctccactgccaccgggttacgcgagcaagc  
accgcaaggtccacgacgcaacgctggtggtgggggctgcaattgcttgcacacgcttcccctaccggagatcatctaccacc  
accaccaccactgcatggttaattcctcctcatggtgaaattgttatccgctcacaattccacacaacatacgagccggaagcataaagttaa  
agcctgggggtcctaagtagtgactaacacattaattgcttgcgctcactgcccgtttccagctctagaagatctcgatcctctacgccg  
gacgcacgtggccggcatcaccggcggcagagtgctggttgcgctataatcggcagatcaccgatggggaagatcgggctcggc  
acttcgggctcatgagcgttcttggcgtgggtatggtggcaggccccgtggccggggactggtggcgccatctccttcatgacccat  
tccttggcgggcggtgctcaacggcctcaactactactgggctgcttctaattgcaggagtcgataaggagagcgtcgatccggga  
caccatcgaatggcgcaaaaccttcgcggtatgcatgatagcggcgggaagagagcaattcagggtggtgaaatgtaaacagtaactg  
tatacgatgctgcagagatgccggtgctcttatcagaccgttcccggctggtgaaccaggccagccacttctcgcgaaaacggggaaa  
aagtggaaagcggcgatggcggagctgaattacattccaaccgctggcacaacaactggcgggcaaacagtcgttctgattggcgttc  
cacctccagctggccctgcacgcgctcgaattgctcggcgattaataatcgcggcgatcaactgggtgccagcgtggtggtgctgat  
ggtagaacgaagcggcgtcgaagcctgtaaagcggcggcacaacttctcgcgcaacgctcagtggtggtgatattaactaccgctgg  
atgaccaggatgccattgctgtggaagctgctcactaatgttccggcggtatttctgatgctctgaccagacaccatcaacagatattttc  
tccatgaagacggctacggcactgggctgggagcatctgctcattgggtcaccagcaaatcgcgctgttagcgggcccattaaattctgct  
tcggcgctctgctgctgctggtggctggcataaatatctactcgaatcaaatcagccgatagcggaaagcggcactggagtgccat  
gtccggttttcaacaacatgcaaatgctgaatgagggcagctgtccactgcgatgctggttccaacgatcagatggcgtggcgcaat  
gcgcgccattaccgagtcgggctgcgctggtgctggatctcggtagtgggatacgacgataccgaagacagctcatgttatcccgc  
cgttaaccacatcaaacaggatttctgctgctgggcaaacagcgtggaccgttctgcaactctcagggccaggcgggtgaagggc  
aatcagctgttcccgtcactggtgaaaagaaaaaccacctggcgccaatacgaaccgctctcccgcgcttggccgattcatta  
atgcagctggcacgacaggttcccactggaaagcggcagtgagcgaacgaattaatgtaagtagctcactcattaggcaccgggat  
ctcgaccgatgcccttgagagcctcaaccagtcagctcctccgggtggcgcggggatgactatcgtcggcacttatgactgtctcttt  
atcatgcaactcgtaggacaggtgccggcagcgtctgggtcatttccggcaggaccgttctgctggagcgcgacgatgctggcctgtc  
gcttgcgggtattcggaaatcttgcacgccctcgtcaagcctcgtcactggtcccggcaccacgcttctggcgagaagcaggccattatcgc  
ggatggcgggcccacgggtgctcagatgctgctcctgctggtgaggaccggctaggctggcggggtgcttactggttagcagaatga  
atcaccgatacgcgagcgaacgtgaagcactgctgctgcaaacgctcgcacctgagcaacaacatgaatggtcttccggttccggttct  
gtaaagtctgaaacgcggaagtcagcgcctgcaccattatgtccggatctcagcagcagcagcagcagcagcagcagcagcagcagc  
atctgtattaacgaagcgtggcattgacctgagtgatttctctgctcccggcgcacataccgccaggtgtttaccctcacaacgttccagt  
aacggggcatgttcatcatcagtaaccctgatcgtgagcctcctcctctgcttaccgcatcattacccccatgaacagaaatcccccttacg  
gaggcatcagtgaccaaacaggaaaaaccgcttaacatggcccgttatacagaagccagacattaacgcttctggagaaactcaacga  
gctggacgcggatgaacaggcagacatctgtaatgcttcacaccacgctgatgagcttaccgagctgcctcgcgcgttctgggtgatga  
cggtgaaaacctctgacacatgacgctcccggagacggcagcctgtctgtaagcggatgccgggagcagacaagcccgtcaggggcgc  
gtcagcgggtgtggcgggtgctggggcgcagccatgaccagtcacgtagcagatagcggagtgatactggcttaactatgctggcagcag  
agcagattgtactgagagtgaccatatacgggtgtgaaataccgcacagatgcgtaaggagaaaataccgcatcaggcgtcttccgcttc  
ctcgtcactgactcgtcgtcgtcgtcgtcgtcgtcgtcgtcgtcgtcgtcgtcgtcgtcgtcgtcgtcgtcgtcgtcgtcgtcgtcgtc  
ggataacgcaggaaagaacatgtgagcaaaaggccagcaaaaggccaggaaccgtaaaaaggccgctgctggcgttctccataggct  
ccgccccctgacgagcatcaaaaaatcagcgtcaagtcaaggtggcgaaccgacagactataaagataccaggcgttccccct  
ggaagctccctcgtcgtcctcgttccgacctgcccgttaccggatcctgtccgcttctccctcgggaagcgtggcgttctcatag  
ctcacgctgtaggtatcagttcgggtgtaggtcgttcgctcaagctgggctgtgtgcacaacccccgttcagcccggaccgtcgcctta  
tccggttaactatgctttagtccaaccggtaagacacgacttatgccactggcagcagccactgtaacaggattagcagagcaggtat

gtagcgggtgctacagagttctgaagtgggtggcctaactacggctacactagaaggacagtatttggtatctgcgctctgctgaagccagtta  
ccttcggaaaaagagttgtagctcttgatccggcaaaaaccaccgctggtagcgggtgtttttgttgcaagcagcagattacgcgcag  
aaaaaaggatctcaagaagatcctttgatctttctacgggtctgacgctcagtggaacgaaactcacgtaagggttttggtcatgaaca  
ataaaactgctgcttacataaacagtaatacaaggggtttatgagccatattcaacgggaaacgcttctcttaggccggtataaattccaac  
atggatgctgatttatatgggtataaatgggctcgcgataatgtcgggcaatcaggtcgcacaatctatcattgatgggaagcccgatgcgc  
cagagttgttctgaacatggcaaggtagcgttgccaatgatgttacagatgagatgggtcagactaaactggctgacggaatttatgcctcttc  
cgaccatcaagcattttatccgtactctgatgatgcatggttactaccactcgcgatccccgggaaaacagcattccagggtattagaagaat  
cctgattcaggtgaaaatattgtgatgcgctggcagtgctcctgcgccggttgattcattcctgtttgtaattgctctttaacagcgcgcgta  
ttcgtctcgtcagggcgaatcacgaatgaataacgggttggtgatgcgagtgattttgatgacgagcgtaatggctggcctgttgaacaagtc  
tgaaagaaatgcataaactttgccattctaccggattcagtcgactcatggtgatttctcacttgataacctattttgacgaggggaaatta  
ataggttgattgatgttgacgagtcggaatcgcagaccgataaccaggatctgccatcctatggaactgcctcgggtgagtttctcctcattac  
agaaacggcttttcaaaaataggattgataatcctgatatgaataaattgcagtttcatttgatgctcgcgatgatttttaagaattaattcatgag  
cggatacatattgaaatgtatttagaaaaataaacaataggggttccgcgcacatttccccgaaaagtgccacctgaaattgtaaacgtaaat  
ttgttaaattcgcgttaaattttgttaaatcagctatttttaaccaataggccgaaatcggcaaaatccctataaatcaaaagaatagaccga  
gatagggttgagtggttccagttggaacaagatccactattaaagaacgtggactccaacgtcaaaggcgaaaaaccgtctatcaggg  
cgatggcccactacgtgaaccatcacccaatcaagtttttggggctgaggtgccgtaaagcactaaatcggaaccctaaaggagcccc  
gatttagagcttgacgggaaagccggcgaacgtggcgagaaagggaagggaagaaagcgaaggagcgggcgctagggcgctggcaa  
gtgtagcgggtcacgctgcgcgtaaccaccacaccgccgcttaatgcgccgtacaggcgctccattcgcca

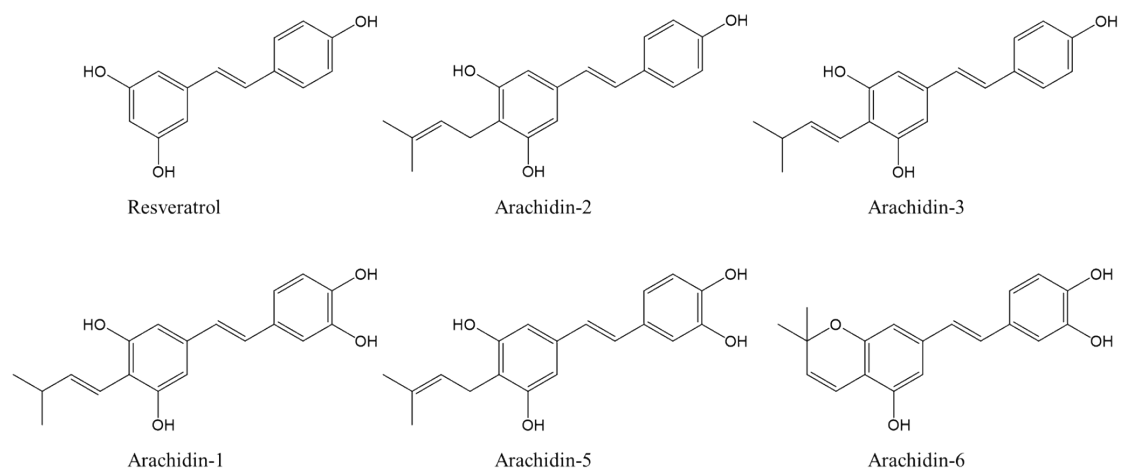

Fig. S10 Resveratrol and the prenylated stilbenoids isolated from the elicited hairy root cultures and seedlings of peanut<sup>38-40</sup>.

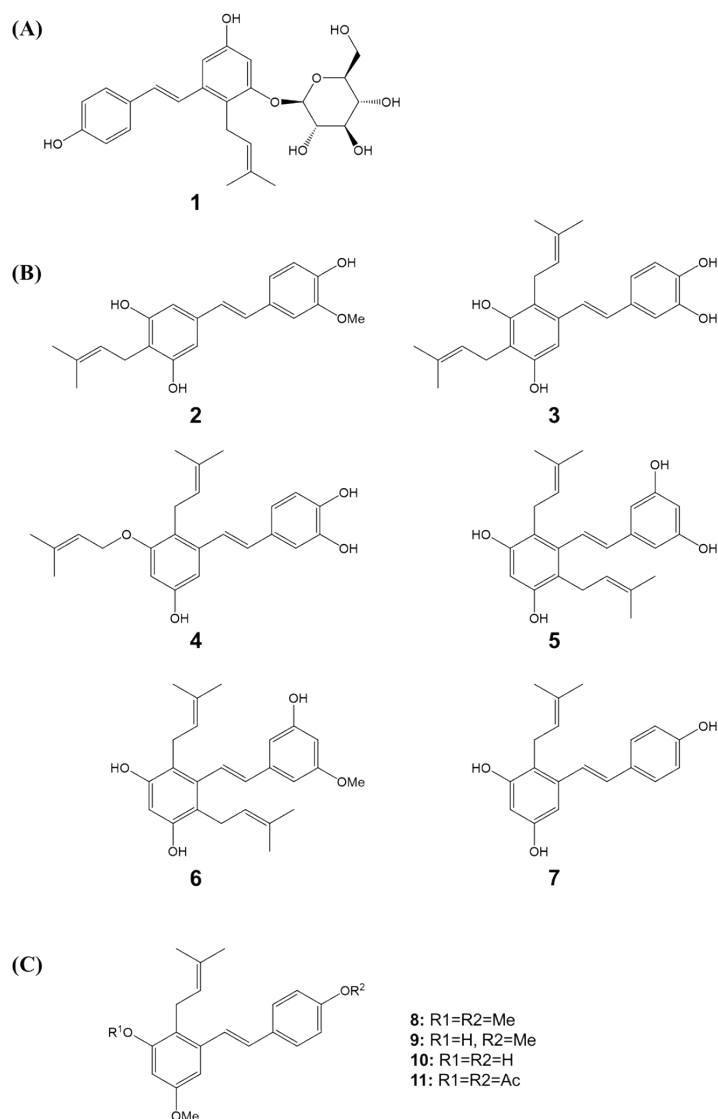

Fig. S11 2-C-prenyl resveratrol and its derivatives. (A) Vulpinoideol A (**1**) from *Carex vulpinoidea*<sup>42</sup>. (B) (*E*)-4-(3-methyl-2-buten-1-yl)-3,4',5-trihydroxy-3'-methoxystilbene (**2**), (*E*)-2,4-bis(3-methyl-2-buten-1-yl)-3,3',4',5-tetrahydroxystilbene (**3**), (*E*)-2-(3-methyl-2-buten-1-yl)-3-(3-methyl-2-butenyloxy)-3',4',5-trihydroxystilbene (**4**), (*E*)-2,6-bis(3-methyl-2-buten-1-yl)-3,3',5,5'-tetrahydroxystilbene (**5**) and (*E*)-2,6-bis(3-methyl-2-buten-1-yl)-3,4',5-trihydroxy-3'-methoxystilbene (**6**), and 2-C-prenyl resveratrol (**7**) isolated from Kangaroo Island propolis<sup>41</sup>. (C) 2-prenyl-3,5,4'-trimethoxystilbene (**8**), 2-prenyl-3-hydroxy-5,4'-dimethoxystilbene (**9**) and 2-prenyl-3,4'-dihydroxy-5-methoxystilbene (**10**) and its corresponding acetate (**11**) isolated from *Scirpus holoschoenus* L.<sup>43</sup>.

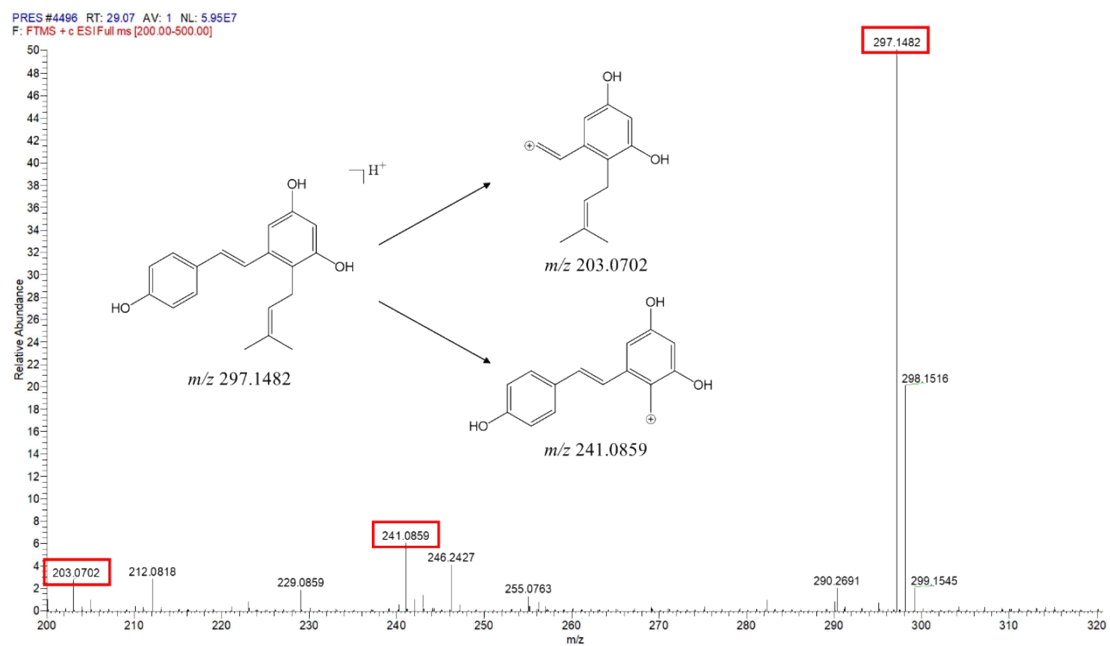

Figure S12. The ESI-MS spectrum and putative fragmentation pathway of the product 2-C-prenyl resveratrol.

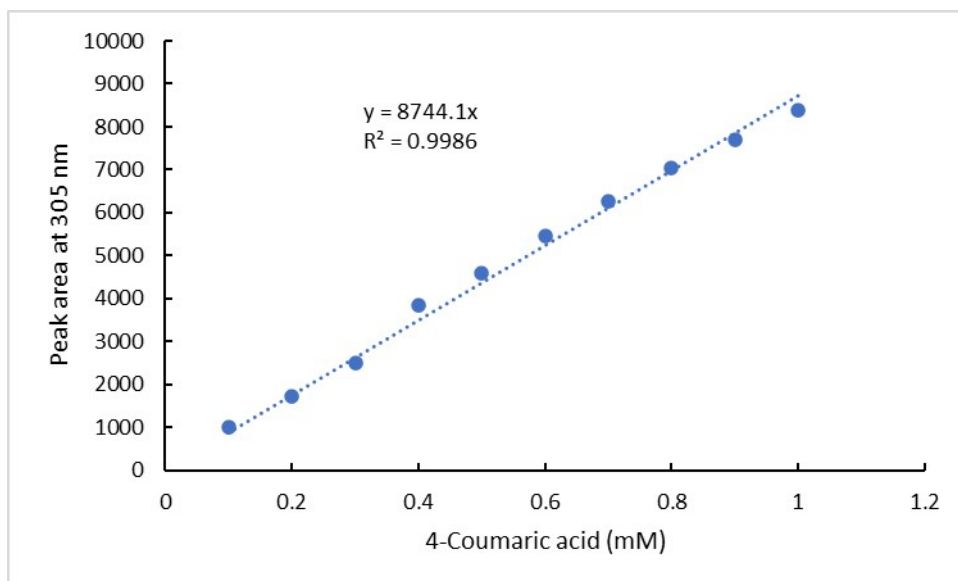

Fig. S13 Standard curve for 4-coumaric acid.

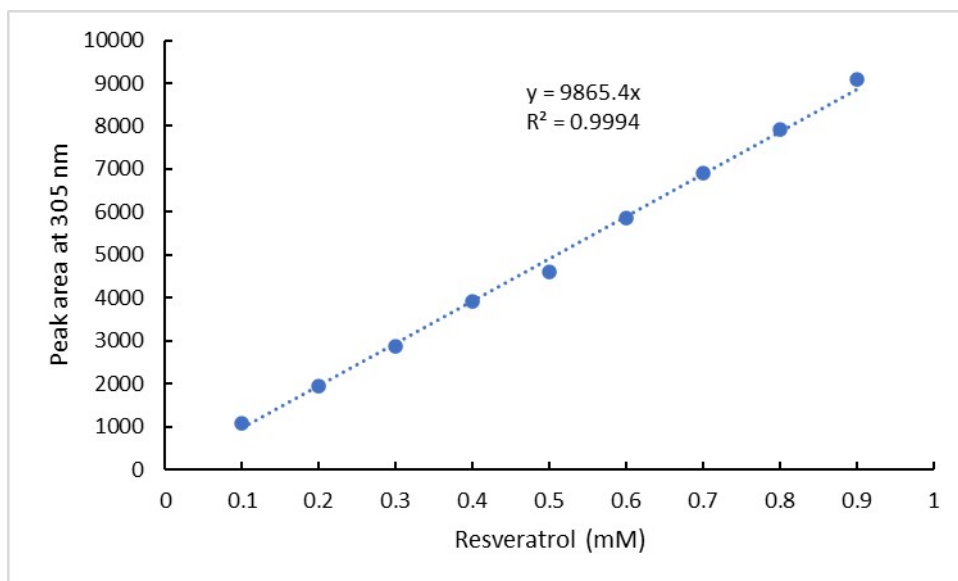

Fig. S14 Standard curve for resveratrol.

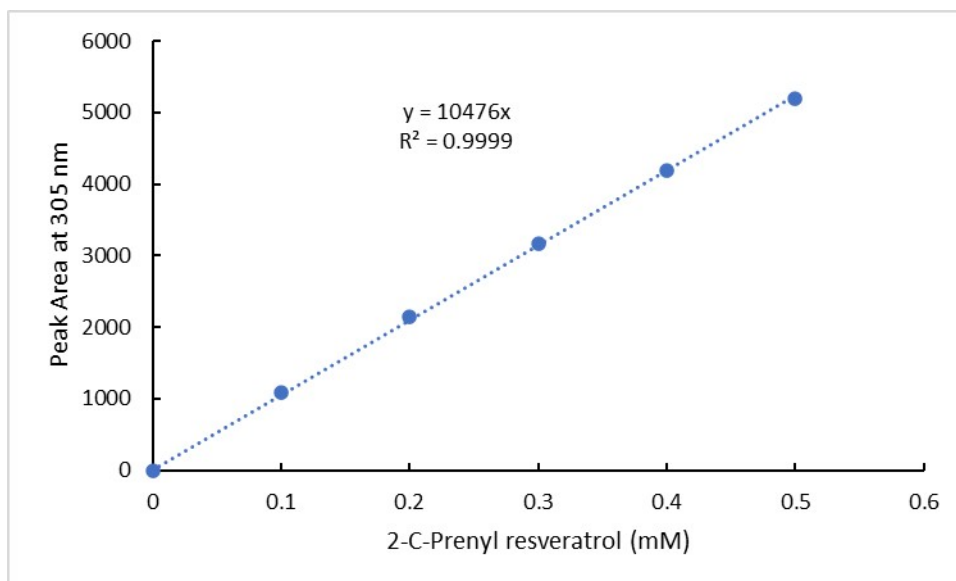

Fig. S15 Standard curve for 2-C-prenyl resveratrol.



Media compositions:

**LB:** tryptone 10 g/L, sodium chloride 10 g/L, yeast extract 5 g/L, sterilized at 121 °C for 20 min.

**Minimal M9:** disodium hydrogen phosphate 6.8 g/L, potassium dihydrogen phosphate 3.0 g/L, sodium chloride 0.5 g/L, ammonium chloride 1.0 g/L, calcium chloride 0.01 g/L, sterilized at 121 °C for 20 min. The medium was supplemented with glucose 10 g/L, magnesium sulfate 0.12 g/L before use. Glucose and magnesium sulfate were sterilized separately at 115 °C for 30 min.

**TB:** tryptone 12 g/L, yeast extract 24 g/L, glycerol 4 mL/L, dipotassium phosphate 12.54 g/L, potassium dihydrogen phosphate 2.31 g/L, sterilized at 121 °C for 20 min.

**EZ Rich Defined Medium** was purchased from Coolaber (Beijing) Technology (product No. MK0106) containing 10×MOPS mixture, 10×ACGU, 5×Supplement EZ, diluted with sterilized water and supplemented with 0.23 g/L sterilized dipotassium phosphate and 2 g/L glucose.

**Mineral medium:** diammonium hydrogen phosphate 4 g/L, potassium dihydrogen phosphate 13.54 g/L, citric acid 1.7 g/L, yeast extract 5 g/L, sterilized at 121 °C for 20 min. The medium was supplemented with glucose 10g/L, magnesium sulfate 0.7 g/L, 200×trace elements 5ml/L before use. Glucose and magnesium sulfate were sterilized separately at 115 °C for 30 min. 200×trace elements were sterilized through filtration with 0.22 µm filter.

200×trace elements: ferrous sulfate 11 g/L, calcium chloride 4 g/L, copper sulfate 1.28 g/L, zinc sulfate 2.47 g/L, ammonium heptamolybdate 0.19 g/L, manganese sulfate 0.68 g/L, sodium tetraborate 0.02 g/L, dissolved in 1 M HCl filtered with 0.22 µm filter.
